# Supplementary material for: Single-cell sequencing analysis reveals the relationship between tumor microenvironment cells and oxidative stress in breast cancer bone metastases
Source: publisher site journal article supplement (doi:10.18632/aging.204885), 2023-07-19
Supplement: Supplementary file [file aging-v15i14-204885-supplementary-material-SD5.pdf]

**Supplementary Table 3. Expression of receptor ligands between cell subpopulations.**

| Ligand | Receptor | Cell_from_mean_exprs | Cell_from           | Cell_to_mean_exprs | Cell_to             | Comm_type     |
|--------|----------|----------------------|---------------------|--------------------|---------------------|---------------|
| CALM2  | INSR     | 19.6089743589744     | BC_PEG10            | 20.9230769230769   | BC_PEG10            | other         |
| CALM2  | INSR     | 19.6089743589744     | BC_PEG10            | 13.821752265861    | BC_GNB2L1           | other         |
| CALM2  | INSR     | 11.5619335347432     | BC_GNB2L1           | 20.9230769230769   | BC_PEG10            | other         |
| CALM2  | INSR     | 11.5619335347432     | BC_GNB2L1           | 13.821752265861    | BC_GNB2L1           | other         |
| ARF1   | INSR     | 6.46794871794872     | BC_PEG10            | 20.9230769230769   | BC_PEG10            | other         |
| AREG   | ERBB3    | 50.2948717948718     | BC_PEG10            | 1.91666666666667   | BC_PEG10            | other         |
| RPS19  | C5AR1    | 80.2884615384615     | BC_PEG10            | 1.16839224513889   | CD4.T               | other         |
| ARF1   | INSR     | 6.46794871794872     | BC_PEG10            | 13.821752265861    | BC_GNB2L1           | other         |
| ARF1   | INSR     | 4.04229607250755     | BC_GNB2L1           | 20.9230769230769   | BC_PEG10            | other         |
| CALM3  | INSR     | 3.1474358974359      | BC_PEG10            | 20.9230769230769   | BC_PEG10            | other         |
| AREG   | ERBB3    | 32.7009063444109     | BC_GNB2L1           | 1.91666666666667   | BC_PEG10            | other         |
| CALM1  | INSR     | 2.91666666666667     | BC_PEG10            | 20.9230769230769   | BC_PEG10            | other         |
| ARF1   | INSR     | 4.04229607250755     | BC_GNB2L1           | 13.821752265861    | BC_GNB2L1           | other         |
| CALM2  | INSR     | 2.60237524234234     | MSC_MARCKSL1        | 20.9230769230769   | BC_PEG10            | other         |
| RPS19  | C5AR1    | 45.9214501510574     | BC_GNB2L1           | 1.16839224513889   | CD4.T               | other         |
| IGF1   | INSR     | 1.54024861578947     | Fibroblasts_MGST1   | 20.9230769230769   | BC_PEG10            | growth factor |
| IGF1   | INSR     | 1.54024861578947     | Fibroblasts_MGST1   | 13.821752265861    | BC_GNB2L1           | growth factor |
| IGF1   | INSR     | 0.960274636585366    | MSC_MGST1           | 20.9230769230769   | BC_PEG10            | growth factor |
| FGF7   | FGFR1    | 1.38125268624813     | MSC_IBSP            | 10.6025641025641   | BC_PEG10            | growth factor |
| FGF7   | FGFR1    | 1.32148095799087     | Fibroblasts_ASPN    | 10.6025641025641   | BC_PEG10            | growth factor |
| IGF1   | INSR     | 0.960274636585366    | MSC_MGST1           | 13.821752265861    | BC_GNB2L1           | growth factor |
| FGF7   | FGFR1    | 1.24366999565217     | MSC_ASPN            | 10.6025641025641   | BC_PEG10            | growth factor |
| FGF7   | FGFR1    | 1.23176533947368     | Fibroblasts_MGST1   | 10.6025641025641   | BC_PEG10            | growth factor |
| FGF7   | FGFR1    | 1.10933513627451     | Fibroblasts_OLFML2B | 10.6025641025641   | BC_PEG10            | growth factor |
| FGF7   | FGFR1    | 1.07037036125        | MSC_COL4A1          | 10.6025641025641   | BC_PEG10            | growth factor |
| FGF7   | FGFR1    | 1.06288600401338     | MSC_TAGLN           | 10.6025641025641   | BC_PEG10            | growth factor |
| FGF7   | FGFR1    | 1.06204908761062     | Fibroblasts_IBSP    | 10.6025641025641   | BC_PEG10            | growth factor |
| FGF7   | FGFR1    | 1.0396824073741      | MSC_SPP1            | 10.6025641025641   | BC_PEG10            | growth factor |
| FGF7   | FGFR1    | 1.02052917982063     | Fibroblasts_TAGLN   | 10.6025641025641   | BC_PEG10            | growth factor |
| FGF7   | FGFR1    | 0.957525197560976    | MSC_MGST1           | 10.6025641025641   | BC_PEG10            | growth factor |
| CD24   | SIGLEC10 | 21.8525641025641     | BC_PEG10            | 0.327505427777778  | CD4.T               | checkpoint    |
| CXCL12 | SDC4     | 2.60106499473684     | Fibroblasts_MGST1   | 2.56410256410256   | BC_PEG10            | cytokine      |
| CXCL12 | ITGB1    | 2.60106499473684     | Fibroblasts_MGST1   | 2.10531071604938   | EN                  | cytokine      |
| CXCL12 | CXCR4    | 2.60106499473684     | Fibroblasts_MGST1   | 2.09322732470862   | CD8.T               | cytokine      |
| CXCL12 | SDC4     | 2.60106499473684     | Fibroblasts_MGST1   | 2.03021148036254   | BC_GNB2L1           | cytokine      |
| CXCL12 | ITGB1    | 2.60106499473684     | Fibroblasts_MGST1   | 1.8766818457265    | MSC_POSTN           | cytokine      |
| CXCL12 | ITGB1    | 2.60106499473684     | Fibroblasts_MGST1   | 1.79928626726457   | Fibroblasts_TAGLN   | cytokine      |
| CXCL12 | ITGB1    | 2.60106499473684     | Fibroblasts_MGST1   | 1.7858228834375    | MSC_COL4A1          | cytokine      |
| CXCL12 | ITGB1    | 2.60106499473684     | Fibroblasts_MGST1   | 1.78367909498328   | MSC_TAGLN           | cytokine      |
| CXCL12 | ITGB1    | 2.60106499473684     | Fibroblasts_MGST1   | 1.77953439019608   | Fibroblasts_OLFML2B | cytokine      |
| CXCL12 | ITGB1    | 2.60106499473684     | Fibroblasts_MGST1   | 1.64979349303062   | BC_BGN              | cytokine      |
| CXCL12 | ITGB1    | 2.60106499473684     | Fibroblasts_MGST1   | 1.64658979452055   | Fibroblasts_ASPN    | cytokine      |
| CXCL12 | ITGB1    | 2.60106499473684     | Fibroblasts_MGST1   | 1.62992778415546   | MSC_IBSP            | cytokine      |
| CXCL12 | ITGB1    | 2.60106499473684     | Fibroblasts_MGST1   | 1.61278043157895   | Fibroblasts_MGST1   | cytokine      |
| CXCL12 | ITGB1    | 2.60106499473684     | Fibroblasts_MGST1   | 1.59678676223022   | MSC_SPP1            | cytokine      |
| CXCL12 | ITGB1    | 2.60106499473684     | Fibroblasts_MGST1   | 1.59097440442478   | Fibroblasts_IBSP    | cytokine      |
| CD24   | SIGLEC10 | 10.1873111782477     | BC_GNB2L1           | 0.327505427777778  | CD4.T               | checkpoint    |
| CD24   | SIGLEC10 | 21.8525641025641     | BC_PEG10            | 0.051744314375     | OC                  | checkpoint    |
| CD24   | SIGLEC10 | 21.8525641025641     | BC_PEG10            | 0.0382243126984127 | B                   | checkpoint    |
| LGALS9 | HAVCR2   | 0.939809984027778    | CD4.T               | 0.854847563194444  | CD4.T               | checkpoint    |
| CD24   | SIGLEC10 | 2.05944244794979     | BC_SCGB2A2          | 0.327505427777778  | CD4.T               | checkpoint    |
| CD24   | SIGLEC10 | 2.02310481390549     | BC_MUC1             | 0.327505427777778  | CD4.T               | checkpoint    |
| LGALS9 | HAVCR2   | 0.694962933950617    | EN                  | 0.854847563194444  | CD4.T               | checkpoint    |
| CD24   | SIGLEC10 | 10.1873111782477     | BC_GNB2L1           | 0.051744314375     | OC                  | checkpoint    |
| CD24   | SIGLEC10 | 1.55538858648649     | MSC_MARCKSL1        | 0.327505427777778  | CD4.T               | checkpoint    |
| CD24   | SIGLEC10 | 1.34344896457243     | BC_FN1              | 0.327505427777778  | CD4.T               | checkpoint    |
| LGALS9 | HAVCR2   | 0.46798954875        | OC                  | 0.854847563194444  | CD4.T               | checkpoint    |
| CD24   | SIGLEC10 | 10.1873111782477     | BC_GNB2L1           | 0.0382243126984127 | B                   | checkpoint    |
| CD24   | SIGLEC10 | 0.947003539473684    | MSC_KRT18           | 0.327505427777778  | CD4.T               | checkpoint    |
| LGALS9 | HAVCR2   | 0.939809984027778    | CD4.T               | 0.265815408522727  | OC                  | checkpoint    |
