# Supplementary material for: Single-cell sequencing analysis reveals the relationship between tumor microenvironment cells and oxidative stress in breast cancer bone metastases
Source: Aging (Albany NY). 2023 Jul 19;15(14):6950–68. doi: 10.18632/aging.204885 (PMC10415571; doi:10.18632/aging.204885)
Supplement: Supplementary Table 1 [file aging-15-204885-s003.xlsx]

## Sheet: Sheet1
Supplementary Table 1. Differentially expressed genes in subpopulations of Fibroblasts.
p_val	avg_log2FC	pct.1	pct.2	p_val_adj	cluster	gene
1.24795e-16	0.454703	0.135	0.012	4.66658e-12	Fibroblasts_S100P	TYROBP
1.50654e-14	0.325887	1	0.999	5.63357e-10	Fibroblasts_S100P	PTMA
1.37768e-13	0.881877	1	0.991	5.15168e-09	Fibroblasts_S100P	FTH1
2.93461e-13	0.418224	0.985	0.94	1.09737e-08	Fibroblasts_S100P	NPM1
4.11705e-13	0.342129	1	0.999	1.53953e-08	Fibroblasts_S100P	EIF1
6.56013e-12	0.365236	1	0.994	2.4531e-07	Fibroblasts_S100P	RPS3
2.38702e-11	1.0031	0.489	0.252	8.92602e-07	Fibroblasts_S100P	KRT18
2.4691e-11	0.63782	0.707	0.586	9.23297e-07	Fibroblasts_S100P	H2AFZ
6.19722e-11	0.446914	0.211	0.055	2.31739e-06	Fibroblasts_S100P	CLDN7
6.50589e-11	0.736623	0.105	0.013	2.43281e-06	Fibroblasts_S100P	NPW
8.04675e-11	1.01572	0.654	0.417	3.009e-06	Fibroblasts_S100P	KRT19
1.1883e-10	0.30014	0.992	0.993	4.44352e-06	Fibroblasts_S100P	FAU
1.25302e-10	0.293436	0.12	0.018	4.68553e-06	Fibroblasts_S100P	RAC2
1.37578e-10	0.536734	1	0.999	5.1446e-06	Fibroblasts_S100P	RPL8
1.39397e-10	0.382303	0.985	0.993	5.21261e-06	Fibroblasts_S100P	TMSB4X
4.2526e-10	0.366538	0.173	0.041	1.59022e-05	Fibroblasts_S100P	MAL2
6.64575e-10	0.407232	0.368	0.159	2.48511e-05	Fibroblasts_S100P	PIM3
8.85866e-10	0.402781	1	0.998	3.31261e-05	Fibroblasts_S100P	RPL32
1.01399e-09	0.275661	0.203	0.057	3.7917e-05	Fibroblasts_S100P	ABCC9
2.70817e-09	0.30712	0.992	0.995	0.000101269	Fibroblasts_S100P	RPS8
3.48081e-09	0.442091	0.835	0.821	0.000130161	Fibroblasts_S100P	ATP6V1G1
4.43534e-09	0.549519	0.827	0.773	0.000165855	Fibroblasts_S100P	SAT1
5.50766e-09	0.507608	0.195	0.059	0.000205954	Fibroblasts_S100P	CKS2
6.43819e-09	0.366727	0.361	0.164	0.00024075	Fibroblasts_S100P	ARHGDIB
8.43403e-09	07:25:21.896000	0.158	0.038	0.000315382	Fibroblasts_S100P	HMGA1
1.31983e-08	0.870864	1	1	0.000493538	Fibroblasts_S100P	MALAT1
1.32703e-08	1.05109	0.293	0.123	0.000496231	Fibroblasts_S100P	AREG
1.35936e-08	0.467015	0.992	0.998	0.00050832	Fibroblasts_S100P	RPL15
1.85556e-08	0.277	0.105	0.018	0.000693869	Fibroblasts_S100P	PCSK1N
2.24935e-08	0.329609	0.391	0.197	0.000841123	Fibroblasts_S100P	S100P
2.37003e-08	0.289376	0.143	0.034	0.00088625	Fibroblasts_S100P	TPD52
2.90642e-08	0.295489	1	0.999	0.00108683	Fibroblasts_S100P	RPS14
3.15281e-08	0.386046	0.331	0.15	0.00117896	Fibroblasts_S100P	DDIT3
3.23675e-08	0.281907	1	0.996	0.00121035	Fibroblasts_S100P	RPL18
3.2408e-08	0.572638	0.451	0.267	0.00121187	Fibroblasts_S100P	MARCKSL1
5.92352e-08	0.453148	0.992	0.984	0.00221504	Fibroblasts_S100P	RPL7
6.04685e-08	0.504318	1	1	0.00226116	Fibroblasts_S100P	H3F3B
7.22244e-08	0.297083	1	0.993	0.00270076	Fibroblasts_S100P	RPL14
8.82025e-08	0.308895	1	0.996	0.00329824	Fibroblasts_S100P	RPL3
1.06641e-07	0.260061	0.165	0.048	0.00398772	Fibroblasts_S100P	TSPAN13
1.20778e-07	0.506075	1	0.999	0.00451638	Fibroblasts_S100P	RPS2
1.34841e-07	0.341439	1	1	0.00504226	Fibroblasts_S100P	RPL10
1.95881e-07	0.522045	0.195	0.067	0.00732476	Fibroblasts_S100P	CLDN3
2.22822e-07	0.401585	1	0.998	0.00833221	Fibroblasts_S100P	GAPDH
2.3711e-07	0.922006	0.421	0.247	0.00886649	Fibroblasts_S100P	KRT8
2.42609e-07	0.434791	0.263	0.109	0.0090721	Fibroblasts_S100P	FXYD3
4.28327e-07	0.307715	0.278	0.122	0.0160169	Fibroblasts_S100P	AP1S2
5.07124e-07	0.328578	0.165	0.052	0.0189634	Fibroblasts_S100P	TUBA4A
5.20801e-07	0.318075	0.128	0.033	0.0194748	Fibroblasts_S100P	SLC9A3R1
5.21572e-07	0.275923	0.15	0.044	0.0195037	Fibroblasts_S100P	PAFAH1B3
5.81277e-07	0.439083	0.97	0.965	0.0217363	Fibroblasts_S100P	OAZ1
6.78318e-07	0.329703	1	0.999	0.025365	Fibroblasts_S100P	RPS19
9.24699e-07	0.299329	1	1	0.0345782	Fibroblasts_S100P	RPL19
1.11437e-06	0.309002	0.241	0.1	0.0416709	Fibroblasts_S100P	KDM6B
1.19407e-06	0.302821	0.211	0.081	0.0446511	Fibroblasts_S100P	VAMP8
1.22958e-06	0.282168	0.94	0.92	0.0459788	Fibroblasts_S100P	TPI1
1.38693e-06	0.317723	0.767	0.794	0.0518629	Fibroblasts_S100P	PABPC1
1.67085e-06	0.34892	0.97	0.996	0.0624797	Fibroblasts_S100P	H3F3A
2.36435e-06	0.292116	0.368	0.203	0.0884126	Fibroblasts_S100P	MXI1
2.36683e-06	0.316681	1	0.997	0.0885051	Fibroblasts_S100P	RPL13A
2.77441e-06	0.312776	0.256	0.117	0.103746	Fibroblasts_S100P	MCAM
3.31037e-06	0.296799	1	0.996	0.123788	Fibroblasts_S100P	RPL6
3.99836e-06	0.482667	0.218	0.093	0.149515	Fibroblasts_S100P	MMP9
5.11384e-06	0.338312	0.895	0.9	0.191227	Fibroblasts_S100P	TXN
5.22401e-06	0.391043	0.195	0.078	0.195347	Fibroblasts_S100P	EPCAM
5.41823e-06	0.251441	1	0.988	0.202609	Fibroblasts_S100P	RPS7
5.84047e-06	0.550125	0.286	0.145	0.218399	Fibroblasts_S100P	S100A14
6.83176e-06	0.256197	1	0.997	0.255467	Fibroblasts_S100P	NACA
9.55206e-06	0.308229	0.985	0.969	0.35719	Fibroblasts_S100P	BTF3
9.77648e-06	0.356592	0.391	0.241	0.365582	Fibroblasts_S100P	ERO1A
1.01997e-05	0.362196	0.323	0.172	0.381409	Fibroblasts_S100P	STARD10
1.03162e-05	0.909732	0.278	0.139	0.385765	Fibroblasts_S100P	ALDOA
1.20375e-05	0.285553	0.376	0.227	0.45013	Fibroblasts_S100P	EPB41L4A-AS1
1.23969e-05	0.60464	0.511	0.384	0.463569	Fibroblasts_S100P	NFKBIA
1.48354e-05	0.470172	0.737	0.632	0.554754	Fibroblasts_S100P	XBP1
1.52345e-05	0.301474	0.977	0.972	0.569678	Fibroblasts_S100P	RPSA
1.98477e-05	0.581659	0.271	0.14	0.742185	Fibroblasts_S100P	ELF3
2.17584e-05	0.353449	0.301	0.163	0.813632	Fibroblasts_S100P	EGLN3
2.66576e-05	0.351151	0.699	0.704	0.996835	Fibroblasts_S100P	SQSTM1
3.57282e-05	0.291222	0.737	0.769	1	Fibroblasts_S100P	BTG1
4.02999e-05	0.253452	0.263	0.132	1	Fibroblasts_S100P	DUSP4
4.57264e-05	0.278561	0.361	0.213	1	Fibroblasts_S100P	WBP2
4.92646e-05	0.277954	0.301	0.168	1	Fibroblasts_S100P	AC020916.1
5.08866e-05	0.306463	0.444	0.298	1	Fibroblasts_S100P	GLRX
5.80141e-05	0.296366	0.113	0.036	1	Fibroblasts_S100P	SPTSSB
6.04673e-05	0.315929	0.195	0.088	1	Fibroblasts_S100P	TSPAN1
6.62525e-05	0.306599	0.917	0.969	1	Fibroblasts_S100P	MUCL1
6.93932e-05	0.325234	0.346	0.211	1	Fibroblasts_S100P	VASP
6.94648e-05	0.43043	0.474	0.348	1	Fibroblasts_S100P	VEGFA
0.000105051	0.359806	0.526	0.427	1	Fibroblasts_S100P	SLC3A2
0.000118597	0.407309	0.308	0.189	1	Fibroblasts_S100P	HILPDA
0.000145599	0.254744	0.128	0.048	1	Fibroblasts_S100P	LSR
0.000166632	0.363135	0.85	0.866	1	Fibroblasts_S100P	RAC1
0.000182183	0.306008	0.865	0.895	1	Fibroblasts_S100P	JUNB
0.000190433	0.340814	0.316	0.189	1	Fibroblasts_S100P	MUC1
0.0002628	0.261893	0.94	0.955	1	Fibroblasts_S100P	EEF1D
0.000359722	0.353832	0.398	0.282	1	Fibroblasts_S100P	ATF3
0.000392596	0.326765	0.308	0.191	1	Fibroblasts_S100P	ATP1B1
0.000419353	0.353726	0.173	0.082	1	Fibroblasts_S100P	SCGB1D2
0.000516521	0.287443	0.677	0.637	1	Fibroblasts_S100P	PPP1R15A
0.000552449	0.416049	0.511	0.391	1	Fibroblasts_S100P	AGR2
0.000683365	0.325661	1	1	1	Fibroblasts_S100P	MT-ND2
0.000714432	0.334178	0.617	0.556	1	Fibroblasts_S100P	TUBB4B
0.000742631	0.281521	0.925	0.939	1	Fibroblasts_S100P	YBX1
0.00075104	0.376395	0.286	0.18	1	Fibroblasts_S100P	ADM
0.000774522	0.312248	0.15	0.069	1	Fibroblasts_S100P	CA2
0.000795426	0.322076	0.368	0.242	1	Fibroblasts_S100P	NAMPT
0.000848309	0.289763	0.895	0.928	1	Fibroblasts_S100P	ENO1
0.000926979	0.524974	0.323	0.219	1	Fibroblasts_S100P	CD24
0.00101986	0.258627	0.218	0.121	1	Fibroblasts_S100P	RGS10
0.00107314	0.269504	0.346	0.231	1	Fibroblasts_S100P	KRT7
0.00114457	0.370997	0.925	0.926	1	Fibroblasts_S100P	COX6C
0.00116197	0.355383	0.639	0.581	1	Fibroblasts_S100P	ATP6V0B
0.00121175	0.269908	0.128	0.057	1	Fibroblasts_S100P	SYNGR2
0.0013041	0.283354	0.669	0.697	1	Fibroblasts_S100P	ZFAS1
0.00139296	0.369902	0.346	0.256	1	Fibroblasts_S100P	RGS2
0.00149723	0.465782	0.286	0.184	1	Fibroblasts_S100P	CLDN4
0.00154834	0.267924	0.579	0.496	1	Fibroblasts_S100P	DDIT4
0.00165463	0.325898	0.865	0.901	1	Fibroblasts_S100P	HINT1
0.00188701	0.346963	0.421	0.323	1	Fibroblasts_S100P	LSM4
0.00199642	0.350607	0.677	0.7	1	Fibroblasts_S100P	EIF3H
0.00220916	0.301562	0.647	0.623	1	Fibroblasts_S100P	PLP2
0.00275971	0.491573	0.368	0.283	1	Fibroblasts_S100P	SPINT2
0.00297398	0.272302	0.406	0.309	1	Fibroblasts_S100P	AMD1
0.00306366	0.258507	0.421	0.328	1	Fibroblasts_S100P	CD44
0.00364742	0.293061	0.218	0.128	1	Fibroblasts_S100P	G0S2
0.00388434	0.297469	0.414	0.317	1	Fibroblasts_S100P	PHLDA2
0.0041404	0.260229	0.211	0.122	1	Fibroblasts_S100P	MGST1
0.00425317	0.260372	0.887	0.879	1	Fibroblasts_S100P	EEF1B2
0.00445255	0.328011	0.594	0.557	1	Fibroblasts_S100P	RHOB
0.00535509	0.295595	0.429	0.334	1	Fibroblasts_S100P	ARL6IP1
0.00542474	0.421953	0.541	0.455	1	Fibroblasts_S100P	SCGB2A2
0.00612612	0.277419	0.699	0.732	1	Fibroblasts_S100P	PGK1
0.00617581	0.325247	1	1	1	Fibroblasts_S100P	MT-CO3
0.00658745	0.258491	0.872	0.92	1	Fibroblasts_S100P	HNRNPA1
0.00659764	0.366707	0.647	0.691	1	Fibroblasts_S100P	IER3
0.00688678	0.378509	1	1	1	Fibroblasts_S100P	MT-CO2
0.00714494	0.299699	0.654	0.68	1	Fibroblasts_S100P	CEBPB
0.00718385	0.293061	0.662	0.639	1	Fibroblasts_S100P	CIB1
0.00774652	0.259301	0.293	0.205	1	Fibroblasts_S100P	ANGPTL4
0.00835368	0.296366	0.451	0.364	1	Fibroblasts_S100P	CD46
0.00854135	0.271722	0.308	0.222	1	Fibroblasts_S100P	PLK2
0.00899999	0.322141	0.677	0.711	1	Fibroblasts_S100P	SERP1
2.00669e-234	1.90689	1	0	7.5038e-230	Fibroblasts_CLDN10	RP5-940J5.9
2.00811e-234	2.32193	1	0	7.50912e-230	Fibroblasts_CLDN10	MYBPC1
2.00843e-234	2.73697	1	0	7.51031e-230	Fibroblasts_CLDN10	CLDN10
7.32341e-215	2.22239	0.917	0	2.73851e-210	Fibroblasts_CLDN10	MAGEA4
3.25744e-197	2.36787	0.917	0.001	1.21809e-192	Fibroblasts_CLDN10	AC090498.1
2.46241e-195	2.05889	0.833	0	9.20793e-191	Fibroblasts_CLDN10	SOSTDC1
7.66186e-176	1.22239	0.75	0	2.86507e-171	Fibroblasts_CLDN10	TFF2
7.67267e-176	1.87447	0.75	0	2.86912e-171	Fibroblasts_CLDN10	KLK5
2.63503e-169	1.41095	0.917	0.003	9.85345e-165	Fibroblasts_CLDN10	EBLN3
4.49393e-165	1.91829	1	0.005	1.68046e-160	Fibroblasts_CLDN10	MYEOV2
1.91388e-158	2.05753	0.75	0.001	7.15675e-154	Fibroblasts_CLDN10	LCN2
4.37773e-158	3.13217	0.917	0.004	1.63701e-153	Fibroblasts_CLDN10	EREG
5.25917e-158	1.65616	0.917	0.004	1.96661e-153	Fibroblasts_CLDN10	MESDC2
1.75371e-157	1.98778	1	0.006	6.55781e-153	Fibroblasts_CLDN10	C14orf2
6.41644e-157	2.25405	1	0.006	2.39936e-152	Fibroblasts_CLDN10	SHFM1
6.42028e-157	2.01483	1	0.006	2.4008e-152	Fibroblasts_CLDN10	COL9A3
2.20356e-156	1	0.667	0	8.24e-152	Fibroblasts_CLDN10	KLK6
2.20787e-156	2.54432	0.667	0	8.25612e-152	Fibroblasts_CLDN10	PI3
2.20874e-156	1.54432	0.667	0	8.25935e-152	Fibroblasts_CLDN10	FAM46A
1.74277e-149	3.95563	1	0.007	6.51693e-145	Fibroblasts_CLDN10	KRT6B
1.12023e-147	1.97031	1	0.007	4.189e-143	Fibroblasts_CLDN10	SELM
6.51799e-144	0.935875	0.75	0.002	2.43734e-139	Fibroblasts_CLDN10	ZCCHC11
1.56793e-142	4.00139	1	0.008	5.8631e-138	Fibroblasts_CLDN10	ATP5E
1.9206e-142	2.62759	1	0.008	7.18188e-138	Fibroblasts_CLDN10	USMG5
1.80222e-141	2.62794	1	0.008	6.73921e-137	Fibroblasts_CLDN10	ATP5L
1.99053e-141	2.30296	1	0.008	7.44339e-137	Fibroblasts_CLDN10	SELK
1.00907e-140	1.85013	1	0.008	3.77332e-136	Fibroblasts_CLDN10	C19orf43
5.08936e-140	2.12429	1	0.008	1.90312e-135	Fibroblasts_CLDN10	TCEB2
2.20321e-139	2.9512	1	0.008	8.23867e-135	Fibroblasts_CLDN10	GNB2L1
4.54796e-139	0.937236	0.667	0.001	1.70066e-134	Fibroblasts_CLDN10	MFI2
5.88171e-137	0.736966	0.583	0	2.19941e-132	Fibroblasts_CLDN10	CTC-444N24.11
2.73947e-132	2.36243	0.75	0.003	1.0244e-127	Fibroblasts_CLDN10	NPY1R
5.1232e-132	1.11139	0.75	0.003	1.91577e-127	Fibroblasts_CLDN10	TMEM261
1.77591e-131	1.97432	0.917	0.007	6.64082e-127	Fibroblasts_CLDN10	ATP5O
1.12935e-130	1.42974	0.917	0.007	4.22311e-126	Fibroblasts_CLDN10	ATP5B
1.18535e-130	1.2554	0.917	0.007	4.43248e-126	Fibroblasts_CLDN10	ATP5J
1.32567e-130	1.79243	0.833	0.005	4.9572e-126	Fibroblasts_CLDN10	NGFRAP1
1.38707e-130	1.30027	0.917	0.007	5.18679e-126	Fibroblasts_CLDN10	ATP5C1
1.55932e-130	1.31513	0.833	0.005	5.83092e-126	Fibroblasts_CLDN10	FAM127B
2.73713e-130	1.10732	0.833	0.005	1.02352e-125	Fibroblasts_CLDN10	LINC00493
2.25983e-125	2.03993	0.917	0.008	8.45039e-121	Fibroblasts_CLDN10	ATP5J2
3.98023e-125	1.11139	0.667	0.002	1.48837e-120	Fibroblasts_CLDN10	FAM60A
4.23766e-125	0.935875	0.667	0.002	1.58463e-120	Fibroblasts_CLDN10	UQCRHL
6.62376e-125	1.78704	0.917	0.008	2.47689e-120	Fibroblasts_CLDN10	ATP5I
1.57828e-123	2.37731	0.917	0.008	5.90183e-119	Fibroblasts_CLDN10	ATP5G3
7.81892e-123	1.56702	0.917	0.008	2.92381e-118	Fibroblasts_CLDN10	ATP5G2
8.63252e-123	1.78908	0.917	0.008	3.22805e-118	Fibroblasts_CLDN10	ATP5H
1.43373e-121	1.21288	0.75	0.004	5.36131e-117	Fibroblasts_CLDN10	ATP5F1
2.27918e-121	0.986428	0.75	0.004	8.52276e-117	Fibroblasts_CLDN10	UFD1L
7.58896e-120	0.735603	0.583	0.001	2.83782e-115	Fibroblasts_CLDN10	WBP5
1.45918e-117	0.584963	0.5	0	5.45647e-113	Fibroblasts_CLDN10	SLCO4A1-AS1
1.45918e-117	0.584963	0.5	0	5.45647e-113	Fibroblasts_CLDN10	DSG1
1.45918e-117	0.584963	0.5	0	5.45647e-113	Fibroblasts_CLDN10	CDH19
1.45918e-117	0.584963	0.5	0	5.45647e-113	Fibroblasts_CLDN10	TPTEP1
1.46089e-117	0.807355	0.5	0	5.46286e-113	Fibroblasts_CLDN10	RP11-49I11.1
6.85392e-115	1.48758	0.833	0.007	2.56295e-110	Fibroblasts_CLDN10	SYT8
4.5001e-114	1.34088	0.833	0.007	1.68277e-109	Fibroblasts_CLDN10	ATP5G1
4.90198e-114	1.36515	0.667	0.003	1.83305e-109	Fibroblasts_CLDN10	KIAA0907
1.11846e-113	1.85685	0.917	0.009	4.18237e-109	Fibroblasts_CLDN10	KYNU
3.33946e-113	1.26486	0.75	0.005	1.24876e-108	Fibroblasts_CLDN10	WBSCR22
4.08419e-107	1.18205	0.833	0.008	1.52724e-102	Fibroblasts_CLDN10	GPX1
1.76784e-106	0.66024	0.583	0.002	6.61067e-102	Fibroblasts_CLDN10	FAM127A
1.63689e-105	0.990486	0.75	0.006	6.12098e-101	Fibroblasts_CLDN10	44819
4.59018e-104	0.867667	0.667	0.004	1.71645e-99	Fibroblasts_CLDN10	FAM103A1
1.05954e-103	1.68417	0.917	0.011	3.96204e-99	Fibroblasts_CLDN10	S100B
1.84053e-102	1.15096	0.833	0.009	6.88247e-98	Fibroblasts_CLDN10	TRIM29
7.93423e-101	0.937236	0.5	0.001	2.96693e-96	Fibroblasts_CLDN10	TPT1-AS1
8.51805e-101	0.661602	0.5	0.001	3.18524e-96	Fibroblasts_CLDN10	SMPDL3B
8.51805e-101	0.661602	0.5	0.001	3.18524e-96	Fibroblasts_CLDN10	LINC00116
9.14159e-101	0.5836	0.5	0.001	3.4184e-96	Fibroblasts_CLDN10	SPG20
3.38176e-98	0.5025	0.417	0	1.26458e-93	Fibroblasts_CLDN10	MLLT4
3.38176e-98	0.5025	0.417	0	1.26458e-93	Fibroblasts_CLDN10	DSCR3
3.38439e-98	0.662965	0.417	0	1.26556e-93	Fibroblasts_CLDN10	ZNF750
3.38597e-98	0.874469	0.417	0	1.26615e-93	Fibroblasts_CLDN10	AC005152.3
1.71842e-97	0.910244	0.75	0.007	6.42588e-93	Fibroblasts_CLDN10	C11orf31
4.51847e-96	1.04803	0.667	0.005	1.68964e-91	Fibroblasts_CLDN10	RTFDC1
8.29354e-96	0.65888	0.583	0.003	3.10129e-91	Fibroblasts_CLDN10	MUC5B
2.12031e-95	1.14425	0.667	0.005	7.92868e-91	Fibroblasts_CLDN10	ATP5A1
7.64118e-94	1.75094	0.833	0.01	2.85734e-89	Fibroblasts_CLDN10	EHF
1.23583e-93	1.31106	0.75	0.008	4.62125e-89	Fibroblasts_CLDN10	MANSC1
7.23794e-89	1.04127	0.667	0.006	2.70656e-84	Fibroblasts_CLDN10	C16orf13
8.76311e-89	0.919634	0.667	0.006	3.27688e-84	Fibroblasts_CLDN10	APOA1BP
8.76422e-89	0.983729	0.667	0.006	3.27729e-84	Fibroblasts_CLDN10	LINC01420
3.22491e-88	0.66024	0.5	0.002	1.20592e-83	Fibroblasts_CLDN10	LYRM5
2.37443e-87	0.994556	0.583	0.004	8.87893e-83	Fibroblasts_CLDN10	C7orf73
2.94233e-87	1.31513	0.583	0.004	1.10026e-82	Fibroblasts_CLDN10	ATP6V1B1
1.759e-85	4.22139	0.917	0.016	6.5776e-81	Fibroblasts_CLDN10	KRT81
5.61482e-84	1.89197	0.75	0.009	2.09961e-79	Fibroblasts_CLDN10	CA9
3.18727e-83	1.09786	0.667	0.007	1.19185e-78	Fibroblasts_CLDN10	C14orf166
5.20764e-83	1.03993	0.667	0.007	1.94735e-78	Fibroblasts_CLDN10	VIMP
6.38728e-82	0.661602	0.417	0.001	2.38846e-77	Fibroblasts_CLDN10	KIAA1715
6.84576e-82	0.5836	0.417	0.001	2.5599e-77	Fibroblasts_CLDN10	RP11-14N7.2
7.33469e-82	0.501137	0.417	0.001	2.74273e-77	Fibroblasts_CLDN10	C7orf49
2.60801e-79	1.75228	0.833	0.014	9.75237e-75	Fibroblasts_CLDN10	LINC00511
7.35712e-79	0.415037	0.333	0	2.75112e-74	Fibroblasts_CLDN10	RP11-195F19.5
7.35712e-79	0.415037	0.333	0	2.75112e-74	Fibroblasts_CLDN10	PSMD5-AS1
7.35712e-79	0.415037	0.333	0	2.75112e-74	Fibroblasts_CLDN10	OBFC1
7.35712e-79	0.415037	0.333	0	2.75112e-74	Fibroblasts_CLDN10	CARKD
7.35712e-79	0.415037	0.333	0	2.75112e-74	Fibroblasts_CLDN10	DGCR14
7.35712e-79	0.415037	0.333	0	2.75112e-74	Fibroblasts_CLDN10	LINC00393
7.36055e-79	0.5025	0.333	0	2.7524e-74	Fibroblasts_CLDN10	PRAME
1.86794e-78	1.96147	0.5	0.003	6.98496e-74	Fibroblasts_CLDN10	KRT15
2.25261e-78	3.68913	0.917	0.019	8.42341e-74	Fibroblasts_CLDN10	WFDC2
4.75471e-77	0.935988	0.667	0.008	1.77797e-72	Fibroblasts_CLDN10	HN1
1.29595e-73	0.727452	0.583	0.006	4.84609e-69	Fibroblasts_CLDN10	LINC00998
7.50819e-73	0.711287	0.583	0.006	2.80761e-68	Fibroblasts_CLDN10	SELT
7.32492e-71	1.05345	0.5	0.004	2.73908e-66	Fibroblasts_CLDN10	LINC00969
3.07385e-70	0.582238	0.417	0.002	1.14943e-65	Fibroblasts_CLDN10	MGEA5
1.03038e-69	4.23449	1	0.028	3.853e-65	Fibroblasts_CLDN10	S100A2
4.67778e-67	2.10983	0.917	0.024	1.74921e-62	Fibroblasts_CLDN10	PLPP2
8.51107e-66	1.37868	0.833	0.019	3.18263e-61	Fibroblasts_CLDN10	KRTCAP3
1.63558e-65	0.787044	0.667	0.01	6.11608e-61	Fibroblasts_CLDN10	SH2D3A
2.5756e-64	0.927732	0.583	0.008	9.63118e-60	Fibroblasts_CLDN10	CDH1
4.7573e-64	1.98808	0.917	0.026	1.77894e-59	Fibroblasts_CLDN10	TACC2
7.44903e-64	0.57139	0.5	0.005	2.78549e-59	Fibroblasts_CLDN10	CTSV
1.68e-63	0.715311	0.583	0.008	6.28221e-59	Fibroblasts_CLDN10	GCNT2
2.96131e-63	1.27166	0.333	0.001	1.10735e-58	Fibroblasts_CLDN10	CCL20
3.38445e-63	0.501137	0.333	0.001	1.26558e-58	Fibroblasts_CLDN10	RP11-382A20.3
3.61702e-63	0.413675	0.333	0.001	1.35255e-58	Fibroblasts_CLDN10	RP11-390F4.3
6.06823e-63	0.625281	0.583	0.008	2.26916e-58	Fibroblasts_CLDN10	TCEB1
1.45502e-61	0.65888	0.417	0.003	5.4409e-57	Fibroblasts_CLDN10	PVRL4
1.45502e-61	0.65888	0.417	0.003	5.4409e-57	Fibroblasts_CLDN10	TUG1
2.58365e-61	0.495698	0.417	0.003	9.6613e-57	Fibroblasts_CLDN10	LINC00460
8.63787e-60	3.78067	1	0.036	3.23005e-55	Fibroblasts_CLDN10	MIA
1.52049e-59	0.321928	0.25	0	5.68571e-55	Fibroblasts_CLDN10	FO538757.2
1.52049e-59	0.321928	0.25	0	5.68571e-55	Fibroblasts_CLDN10	PROM1
1.52049e-59	0.321928	0.25	0	5.68571e-55	Fibroblasts_CLDN10	C5orf42
1.52049e-59	0.321928	0.25	0	5.68571e-55	Fibroblasts_CLDN10	RP11-140K17.3
1.52049e-59	0.321928	0.25	0	5.68571e-55	Fibroblasts_CLDN10	ZCCHC6
1.52049e-59	0.321928	0.25	0	5.68571e-55	Fibroblasts_CLDN10	ATP5EP2
1.52049e-59	0.321928	0.25	0	5.68571e-55	Fibroblasts_CLDN10	RP11-65I12.1
1.52049e-59	0.321928	0.25	0	5.68571e-55	Fibroblasts_CLDN10	MMP7
1.52049e-59	0.321928	0.25	0	5.68571e-55	Fibroblasts_CLDN10	RP11-1109M24.5
1.52084e-59	0.5025	0.25	0	5.68704e-55	Fibroblasts_CLDN10	C6orf141
1.52084e-59	0.5025	0.25	0	5.68704e-55	Fibroblasts_CLDN10	KLK7
9.72534e-59	0.726098	0.5	0.006	3.63669e-54	Fibroblasts_CLDN10	CH17-189H20.1
1.24638e-58	0.575449	0.5	0.006	4.6607e-54	Fibroblasts_CLDN10	FTSJ2
5.59418e-57	2.18653	0.917	0.03	2.09189e-52	Fibroblasts_CLDN10	PDE4B
1.08273e-56	1.2554	0.583	0.009	4.04874e-52	Fibroblasts_CLDN10	PRRG4
1.71121e-56	1.28424	0.833	0.024	6.3989e-52	Fibroblasts_CLDN10	EFNB2
1.57411e-55	1.59895	1	0.038	5.88622e-51	Fibroblasts_CLDN10	KLF5
1.63971e-55	0.781509	0.583	0.009	6.13155e-51	Fibroblasts_CLDN10	SERPINA1
4.1099e-55	1.27762	0.833	0.025	1.53686e-50	Fibroblasts_CLDN10	MAP7
1.30064e-54	0.497056	0.417	0.004	4.8636e-50	Fibroblasts_CLDN10	ROPN1B
1.30064e-54	0.497056	0.417	0.004	4.8636e-50	Fibroblasts_CLDN10	PLEKHB1
1.36445e-54	0.578161	0.417	0.004	5.10222e-50	Fibroblasts_CLDN10	C14orf1
1.72122e-54	0.576804	0.417	0.004	6.43633e-50	Fibroblasts_CLDN10	LINC00657
2.51272e-54	0.653451	0.5	0.007	9.39608e-50	Fibroblasts_CLDN10	ZC3H11A
8.66404e-53	0.639968	0.583	0.01	3.23983e-48	Fibroblasts_CLDN10	PKP1
9.5152e-53	0.499776	0.333	0.002	3.55811e-48	Fibroblasts_CLDN10	FGF13
1.06318e-52	0.412313	0.333	0.002	3.97565e-48	Fibroblasts_CLDN10	AP006222.2
1.06318e-52	0.412313	0.333	0.002	3.97565e-48	Fibroblasts_CLDN10	FAM63A
1.06318e-52	0.412313	0.333	0.002	3.97565e-48	Fibroblasts_CLDN10	ASUN
1.06416e-52	0.580877	0.333	0.002	3.97933e-48	Fibroblasts_CLDN10	DSG3
1.32918e-52	0.410952	0.333	0.002	4.97033e-48	Fibroblasts_CLDN10	KDF1
1.71716e-52	0.77233	0.583	0.01	6.42115e-48	Fibroblasts_CLDN10	LCP1
3.87695e-50	0.57004	0.5	0.008	1.44975e-45	Fibroblasts_CLDN10	TMEM40
3.27792e-49	0.653451	0.417	0.005	1.22574e-44	Fibroblasts_CLDN10	SCO2
2.26085e-47	1.8594	1	0.046	8.45421e-43	Fibroblasts_CLDN10	SMIM22
8.11267e-47	1.89392	0.917	0.039	3.03365e-42	Fibroblasts_CLDN10	CAPS
6.11523e-46	0.765691	0.75	0.024	2.28673e-41	Fibroblasts_CLDN10	ANK3
2.79942e-45	0.498415	0.333	0.003	1.04681e-40	Fibroblasts_CLDN10	CMB9-22P13.1
3.2286e-45	0.410952	0.333	0.003	1.2073e-40	Fibroblasts_CLDN10	C1orf27
3.2286e-45	0.410952	0.333	0.003	1.2073e-40	Fibroblasts_CLDN10	RP11-620J15.3
6.78909e-45	2.80136	1	0.051	2.53871e-40	Fibroblasts_CLDN10	RBP1
7.59241e-45	0.413675	0.25	0.001	2.83911e-40	Fibroblasts_CLDN10	ILF3-AS1
8.08193e-45	0.320565	0.25	0.001	3.02216e-40	Fibroblasts_CLDN10	LINC00869
8.08193e-45	0.320565	0.25	0.001	3.02216e-40	Fibroblasts_CLDN10	RP11-83A24.2
8.08193e-45	0.320565	0.25	0.001	3.02216e-40	Fibroblasts_CLDN10	FAM35A
8.60733e-45	0.499776	0.25	0.001	3.21862e-40	Fibroblasts_CLDN10	LRAT
8.62355e-45	0.654806	0.417	0.006	3.22469e-40	Fibroblasts_CLDN10	KRT23
9.75714e-45	0.319203	0.25	0.001	3.64859e-40	Fibroblasts_CLDN10	C10orf35
9.75714e-45	0.319203	0.25	0.001	3.64859e-40	Fibroblasts_CLDN10	LLNLR-245B6.1
3.57163e-44	0.896935	0.667	0.019	1.33557e-39	Fibroblasts_CLDN10	CXADR
5.19137e-44	1.71511	0.833	0.033	1.94126e-39	Fibroblasts_CLDN10	DMKN
5.03522e-41	0.549937	0.5	0.01	1.88287e-36	Fibroblasts_CLDN10	SERPINB5
5.87993e-41	0.818305	0.667	0.021	2.19874e-36	Fibroblasts_CLDN10	ITGB4
9.33879e-41	0.813069	0.75	0.027	3.49215e-36	Fibroblasts_CLDN10	F11R
1.1452e-40	0.564652	0.417	0.007	4.28236e-36	Fibroblasts_CLDN10	ATPIF1
3.06488e-40	0.415037	0.167	0	1.14608e-35	Fibroblasts_CLDN10	LINC00664
3.06512e-40	0.584963	0.167	0	1.14617e-35	Fibroblasts_CLDN10	KLK11
3.06512e-40	0.415037	0.167	0	1.14617e-35	Fibroblasts_CLDN10	RP11-138A9.1
3.06512e-40	0.321928	0.167	0	1.14617e-35	Fibroblasts_CLDN10	DNER
3.06512e-40	0.321928	0.167	0	1.14617e-35	Fibroblasts_CLDN10	LSAMP
3.06512e-40	0.321928	0.167	0	1.14617e-35	Fibroblasts_CLDN10	C11orf86
3.06512e-40	0.321928	0.167	0	1.14617e-35	Fibroblasts_CLDN10	C6orf15
7.38539e-40	1.61733	0.75	0.03	2.76169e-35	Fibroblasts_CLDN10	FOLR1
1.86093e-39	0.406879	0.333	0.004	6.95876e-35	Fibroblasts_CLDN10	CCDC53
2.90204e-38	0.927732	0.417	0.008	1.08519e-33	Fibroblasts_CLDN10	SRRM2-AS1
3.66835e-37	0.962316	0.667	0.025	1.37174e-32	Fibroblasts_CLDN10	ITGB8
5.95952e-37	1.07249	0.583	0.018	2.2285e-32	Fibroblasts_CLDN10	SDCBP2
1.59785e-36	0.767016	0.583	0.018	5.97502e-32	Fibroblasts_CLDN10	ADGRG1
3.22514e-36	2.94237	1	0.071	1.20601e-31	Fibroblasts_CLDN10	GPRC5A
5.13088e-36	0.412313	0.25	0.002	1.91864e-31	Fibroblasts_CLDN10	FAM63B
5.13088e-36	0.412313	0.25	0.002	1.91864e-31	Fibroblasts_CLDN10	RP4-568C11.4
5.67031e-36	0.319203	0.25	0.002	2.12036e-31	Fibroblasts_CLDN10	INADL
5.67031e-36	0.319203	0.25	0.002	2.12036e-31	Fibroblasts_CLDN10	C2orf47
5.67031e-36	0.319203	0.25	0.002	2.12036e-31	Fibroblasts_CLDN10	WHSC1
5.67031e-36	0.319203	0.25	0.002	2.12036e-31	Fibroblasts_CLDN10	C4orf27
5.67031e-36	0.319203	0.25	0.002	2.12036e-31	Fibroblasts_CLDN10	RNMTL1
6.27057e-36	0.409593	0.25	0.002	2.34482e-31	Fibroblasts_CLDN10	FGFBP2
6.59141e-36	0.317843	0.25	0.002	2.46479e-31	Fibroblasts_CLDN10	CCDC64B
9.69119e-36	2.00144	0.833	0.043	3.62392e-31	Fibroblasts_CLDN10	DHCR24
2.16132e-35	0.730164	0.333	0.005	8.08206e-31	Fibroblasts_CLDN10	CTA-29F11.1
2.60049e-35	0.495698	0.333	0.005	9.72426e-31	Fibroblasts_CLDN10	FAM195B
3.62869e-35	0.405524	0.333	0.005	1.35691e-30	Fibroblasts_CLDN10	C1orf210
4.07246e-35	0.49028	0.417	0.009	1.52286e-30	Fibroblasts_CLDN10	RNF212
4.20859e-35	0.405524	0.333	0.005	1.57376e-30	Fibroblasts_CLDN10	C11orf73
7.55591e-34	0.629271	0.583	0.02	2.82546e-29	Fibroblasts_CLDN10	COL9A2
1.52191e-32	2.49338	0.833	0.05	5.69102e-28	Fibroblasts_CLDN10	KRT16
1.56331e-32	1.01591	0.667	0.029	5.84586e-28	Fibroblasts_CLDN10	TMEM79
7.5671e-32	0.575449	0.333	0.006	2.82964e-27	Fibroblasts_CLDN10	CD163L1
7.70299e-32	0.707274	0.5	0.015	2.88046e-27	Fibroblasts_CLDN10	PTPN6
9.86472e-32	0.406879	0.333	0.006	3.68881e-27	Fibroblasts_CLDN10	C17orf62
1.20604e-31	0.49028	0.333	0.006	4.50985e-27	Fibroblasts_CLDN10	UTP11L
2.73215e-31	2.13155	1	0.085	1.02166e-26	Fibroblasts_CLDN10	LYPD3
5.93235e-31	1.18315	0.917	0.063	2.21834e-26	Fibroblasts_CLDN10	FAM215B
4.01703e-30	0.410952	0.25	0.003	1.50213e-25	Fibroblasts_CLDN10	TMEM5
4.01703e-30	0.410952	0.25	0.003	1.50213e-25	Fibroblasts_CLDN10	SQRDL
4.55115e-30	0.317843	0.25	0.003	1.70186e-25	Fibroblasts_CLDN10	MINA
4.55115e-30	0.317843	0.25	0.003	1.70186e-25	Fibroblasts_CLDN10	ARHGAP4
4.55115e-30	0.317843	0.25	0.003	1.70186e-25	Fibroblasts_CLDN10	TMPRSS13
4.55324e-30	0.495698	0.25	0.003	1.70264e-25	Fibroblasts_CLDN10	ECE2
1.0288e-29	0.933382	0.75	0.042	3.84709e-25	Fibroblasts_CLDN10	APOO
1.6567e-29	2.27266	0.667	0.034	6.19505e-25	Fibroblasts_CLDN10	MALL
4.73278e-29	0.575449	0.333	0.007	1.76978e-24	Fibroblasts_CLDN10	BNIPL
5.4146e-29	2.12588	0.75	0.045	2.02473e-24	Fibroblasts_CLDN10	HLA-DQB1
5.50097e-29	0.567344	0.417	0.011	2.05703e-24	Fibroblasts_CLDN10	AC007325.4
9.20415e-29	0.398766	0.333	0.007	3.4418e-24	Fibroblasts_CLDN10	B3GNT5
8.17928e-28	1.46216	0.917	0.075	3.05856e-23	Fibroblasts_CLDN10	OCIAD2
3.59391e-27	0.413675	0.167	0.001	1.34391e-22	Fibroblasts_CLDN10	RP11-532F12.5
3.80024e-27	0.413675	0.167	0.001	1.42106e-22	Fibroblasts_CLDN10	RP1-313I6.12
3.80024e-27	0.320565	0.167	0.001	1.42106e-22	Fibroblasts_CLDN10	KIAA1033
9.09705e-27	0.726098	0.333	0.008	3.40175e-22	Fibroblasts_CLDN10	PON3
1.54088e-26	0.922328	0.333	0.008	5.76196e-22	Fibroblasts_CLDN10	PLCG2
1.76777e-26	0.40417	0.333	0.008	6.6104e-22	Fibroblasts_CLDN10	LY6K
1.97559e-26	0.400115	0.333	0.008	7.3875e-22	Fibroblasts_CLDN10	IRF6
3.98052e-26	0.644	0.417	0.013	1.48847e-21	Fibroblasts_CLDN10	ZNF90
7.33498e-26	0.408236	0.25	0.004	2.74284e-21	Fibroblasts_CLDN10	GBAS
2.13191e-25	0.892966	0.583	0.029	7.97205e-21	Fibroblasts_CLDN10	FILIP1
5.47787e-25	2.12322	1	0.105	2.04839e-20	Fibroblasts_CLDN10	ST3GAL4
5.93638e-25	0.687374	0.583	0.029	2.21985e-20	Fibroblasts_CLDN10	DSG2
2.28544e-24	0.396072	0.333	0.009	8.54618e-20	Fibroblasts_CLDN10	BEX2
4.56794e-24	0.548607	0.5	0.022	1.70813e-19	Fibroblasts_CLDN10	MAPK13
8.08216e-24	1.46704	0.833	0.071	3.02224e-19	Fibroblasts_CLDN10	DSP
1.55451e-23	0.92559	0.667	0.043	5.81293e-19	Fibroblasts_CLDN10	DSC2
1.56985e-23	2.52429	1	0.123	5.8703e-19	Fibroblasts_CLDN10	MGST1
3.28003e-23	0.836453	0.833	0.066	1.22654e-18	Fibroblasts_CLDN10	CLDN7
4.53022e-23	1.3806	0.917	0.088	1.69403e-18	Fibroblasts_CLDN10	VAMP8
9.98418e-23	2.41217	1	0.116	3.73348e-18	Fibroblasts_CLDN10	AZGP1
1.12556e-22	0.315126	0.25	0.005	4.20891e-18	Fibroblasts_CLDN10	GJC3
1.12556e-22	0.315126	0.25	0.005	4.20891e-18	Fibroblasts_CLDN10	SBF2-AS1
1.12556e-22	0.315126	0.25	0.005	4.20891e-18	Fibroblasts_CLDN10	RP11-12G12.7
1.22272e-22	0.398766	0.333	0.009	4.57223e-18	Fibroblasts_CLDN10	SERPINA5
1.23619e-22	0.31377	0.25	0.005	4.6226e-18	Fibroblasts_CLDN10	CPSF3L
3.25921e-22	0.725196	0.667	0.044	1.21875e-17	Fibroblasts_CLDN10	VPS37B
3.50198e-22	1.3157	0.583	0.036	1.30953e-17	Fibroblasts_CLDN10	PID1
5.33663e-22	1.05592	0.833	0.078	1.99558e-17	Fibroblasts_CLDN10	ARSD
5.66329e-22	0.583384	0.583	0.033	2.11773e-17	Fibroblasts_CLDN10	SLC38A1
8.0811e-22	0.548607	0.5	0.025	3.02185e-17	Fibroblasts_CLDN10	URB1-AS1
1.93883e-21	0.556607	0.417	0.017	7.25005e-17	Fibroblasts_CLDN10	TUFT1
7.07938e-21	2.4633	0.917	0.106	2.64726e-16	Fibroblasts_CLDN10	S100A9
7.96579e-21	0.80006	0.667	0.048	2.97873e-16	Fibroblasts_CLDN10	CXorf40B
9.67294e-21	1.3722	0.833	0.086	3.6171e-16	Fibroblasts_CLDN10	USP36
1.08348e-20	2.91784	1	0.147	4.05157e-16	Fibroblasts_CLDN10	ALDOA
1.51694e-20	0.317843	0.167	0.002	5.67245e-16	Fibroblasts_CLDN10	NMU
1.67441e-20	0.551269	0.417	0.018	6.2613e-16	Fibroblasts_CLDN10	PIGA
1.75047e-20	1.01922	0.667	0.049	6.5457e-16	Fibroblasts_CLDN10	DDR1
2.37784e-20	0.494342	0.25	0.006	8.89168e-16	Fibroblasts_CLDN10	TMPRSS3
2.65623e-20	1.61026	0.917	0.107	9.9327e-16	Fibroblasts_CLDN10	PHGDH
3.60179e-20	0.312414	0.25	0.006	1.34685e-15	Fibroblasts_CLDN10	C6orf1
4.25238e-20	0.305657	0.25	0.006	1.59013e-15	Fibroblasts_CLDN10	PSD4
4.61942e-20	0.307006	0.25	0.006	1.72739e-15	Fibroblasts_CLDN10	RAB17
4.61954e-20	0.301618	0.25	0.006	1.72743e-15	Fibroblasts_CLDN10	STRA13
5.23593e-20	0.486229	0.333	0.011	1.95792e-15	Fibroblasts_CLDN10	C6orf132
7.28761e-20	0.396072	0.333	0.011	2.72513e-15	Fibroblasts_CLDN10	RHPN2
1.23618e-19	0.769308	0.667	0.051	4.62256e-15	Fibroblasts_CLDN10	LSR
1.47677e-19	6.07472	1	0.164	5.52224e-15	Fibroblasts_CLDN10	SLPI
1.53974e-19	2.92715	1	0.153	5.75769e-15	Fibroblasts_CLDN10	S100A14
2.13791e-19	0.765691	0.5	0.029	7.99452e-15	Fibroblasts_CLDN10	LINC00346
5.63226e-19	0.621301	0.417	0.02	2.10613e-14	Fibroblasts_CLDN10	CXCR4
5.89084e-19	0.567344	0.333	0.012	2.20282e-14	Fibroblasts_CLDN10	GRB7
6.28149e-19	0.549937	0.417	0.02	2.3489e-14	Fibroblasts_CLDN10	TTLL4
6.93215e-19	2.59046	0.917	0.133	2.59221e-14	Fibroblasts_CLDN10	AVPI1
7.67663e-19	0.606801	0.5	0.029	2.8706e-14	Fibroblasts_CLDN10	STAP2
9.04585e-19	0.479503	0.333	0.012	3.3826e-14	Fibroblasts_CLDN10	CRB3
9.31224e-19	0.996187	0.5	0.03	3.48222e-14	Fibroblasts_CLDN10	CHI3L2
4.24159e-18	0.304309	0.25	0.007	1.5861e-13	Fibroblasts_CLDN10	CTD-3252C9.4
4.88742e-18	0.78839	0.333	0.013	1.8276e-13	Fibroblasts_CLDN10	CLN3
1.01899e-17	0.767016	0.417	0.022	3.81041e-13	Fibroblasts_CLDN10	PALMD
1.05684e-17	0.396072	0.333	0.013	3.95194e-13	Fibroblasts_CLDN10	POLR2J3
1.31802e-17	0.386682	0.333	0.013	4.92859e-13	Fibroblasts_CLDN10	TMC6
6.83851e-17	2.65378	1	0.186	2.55719e-12	Fibroblasts_CLDN10	PERP
9.54705e-17	0.614692	0.5	0.034	3.57002e-12	Fibroblasts_CLDN10	PPRC1
1.2426e-16	0.317843	0.167	0.003	4.64659e-12	Fibroblasts_CLDN10	LINC01554
1.32555e-16	0.853599	0.833	0.1	4.95677e-12	Fibroblasts_CLDN10	NTHL1
1.42006e-16	0.315126	0.167	0.003	5.31016e-12	Fibroblasts_CLDN10	FAM83H-AS1
1.45076e-16	0.535371	0.333	0.014	5.42496e-12	Fibroblasts_CLDN10	CHI3L1
1.78819e-16	0.629271	0.583	0.046	6.68674e-12	Fibroblasts_CLDN10	RAB25
2.75402e-16	0.507965	0.5	0.034	1.02984e-11	Fibroblasts_CLDN10	NUPR2
3.49203e-16	0.744648	0.5	0.036	1.30581e-11	Fibroblasts_CLDN10	SLC7A5
3.71482e-16	4.5772	1	0.213	1.38912e-11	Fibroblasts_CLDN10	S100P
4.68647e-16	0.553936	0.333	0.015	1.75246e-11	Fibroblasts_CLDN10	BIK
5.3522e-16	0.693977	0.333	0.015	2.0014e-11	Fibroblasts_CLDN10	MISP
6.59413e-16	6.01008	1	0.224	2.46581e-11	Fibroblasts_CLDN10	KRT17
7.42096e-16	0.384011	0.333	0.015	2.77499e-11	Fibroblasts_CLDN10	MPZL2
7.42633e-16	0.79618	0.583	0.051	2.777e-11	Fibroblasts_CLDN10	IQCG
7.98795e-16	2.12009	1	0.204	2.98701e-11	Fibroblasts_CLDN10	GLIPR1
9.5163e-16	0.816994	0.5	0.038	3.55853e-11	Fibroblasts_CLDN10	INHBB
1.051e-15	1.61114	0.75	0.09	3.93011e-11	Fibroblasts_CLDN10	TACSTD2
1.5549e-15	0.639968	0.333	0.016	5.81441e-11	Fibroblasts_CLDN10	HSD17B8
1.95824e-15	1.12908	0.75	0.09	7.32264e-11	Fibroblasts_CLDN10	ARHGAP18
2.01364e-15	0.773116	0.667	0.068	7.52981e-11	Fibroblasts_CLDN10	SOX6
3.04986e-15	0.460836	0.417	0.026	1.14047e-10	Fibroblasts_CLDN10	QPRT
3.25341e-15	1.09614	0.833	0.117	1.21658e-10	Fibroblasts_CLDN10	SRPK1
3.92768e-15	0.38802	0.333	0.016	1.46872e-10	Fibroblasts_CLDN10	RBM38
7.33716e-15	0.663852	0.5	0.039	2.74366e-10	Fibroblasts_CLDN10	SPINT1
8.57075e-15	1.01983	0.75	0.096	3.20495e-10	Fibroblasts_CLDN10	PRR34-AS1
8.83379e-15	0.802088	0.75	0.091	3.30331e-10	Fibroblasts_CLDN10	MSRB1
8.95231e-15	0.460836	0.417	0.026	3.34763e-10	Fibroblasts_CLDN10	ARRB2
1.00486e-14	0.520951	0.417	0.026	3.75759e-10	Fibroblasts_CLDN10	ITGB6
1.05946e-14	0.527488	0.5	0.039	3.96176e-10	Fibroblasts_CLDN10	RECQL5
1.22552e-14	1.50201	0.833	0.134	4.58272e-10	Fibroblasts_CLDN10	TOMM5
1.97381e-14	1.84863	0.833	0.13	7.38085e-10	Fibroblasts_CLDN10	SGK1
2.33325e-14	1.25649	0.667	0.074	8.72497e-10	Fibroblasts_CLDN10	IRS2
3.16628e-14	2.56492	1	0.236	1.184e-09	Fibroblasts_CLDN10	NCOA7
3.43187e-14	1.81379	0.917	0.171	1.28331e-09	Fibroblasts_CLDN10	SDC4
4.15864e-14	4.34396	1	0.257	1.55508e-09	Fibroblasts_CLDN10	NDUFA4L2
4.36773e-14	0.692088	0.667	0.074	1.63327e-09	Fibroblasts_CLDN10	PDHX
5.04092e-14	0.737958	0.75	0.095	1.885e-09	Fibroblasts_CLDN10	PLD1
5.71568e-14	0.884733	0.667	0.078	2.13732e-09	Fibroblasts_CLDN10	IQCK
5.73724e-14	0.315126	0.167	0.004	2.14538e-09	Fibroblasts_CLDN10	GPAT3
1.22719e-13	1.41203	0.917	0.176	4.58894e-09	Fibroblasts_CLDN10	CD109
1.36388e-13	0.690012	0.417	0.03	5.10008e-09	Fibroblasts_CLDN10	ACTR3B
1.45136e-13	0.524869	0.5	0.043	5.42721e-09	Fibroblasts_CLDN10	PCAT6
2.52317e-13	0.713094	0.833	0.119	9.43515e-09	Fibroblasts_CLDN10	NQO1
2.80679e-13	1.97269	0.667	0.081	1.04957e-08	Fibroblasts_CLDN10	S100A8
4.16428e-13	0.302963	0.25	0.01	1.55719e-08	Fibroblasts_CLDN10	PGAM2
4.39138e-13	0.300274	0.25	0.01	1.64211e-08	Fibroblasts_CLDN10	GRHL1
4.43437e-13	0.684554	0.667	0.079	1.65819e-08	Fibroblasts_CLDN10	JARID2
8.29836e-13	0.657262	0.5	0.043	3.10309e-08	Fibroblasts_CLDN10	C3
9.22402e-13	2.28053	0.917	0.214	3.44923e-08	Fibroblasts_CLDN10	GPX3
1.36688e-12	0.531424	0.417	0.032	5.11131e-08	Fibroblasts_CLDN10	RAD50
1.64911e-12	0.956808	0.75	0.112	6.16669e-08	Fibroblasts_CLDN10	NFKBIL1
1.76398e-12	1.39552	0.917	0.213	6.59624e-08	Fibroblasts_CLDN10	CREB3
1.8777e-12	0.874696	0.667	0.091	7.02149e-08	Fibroblasts_CLDN10	NDUFAF4
2.00942e-12	0.450276	0.417	0.032	7.51404e-08	Fibroblasts_CLDN10	KSR1
2.68015e-12	0.462161	0.333	0.021	1.00222e-07	Fibroblasts_CLDN10	DHCR7
2.90992e-12	1.8193	0.917	0.188	1.08814e-07	Fibroblasts_CLDN10	CLDN4
2.95371e-12	0.304309	0.25	0.011	1.10451e-07	Fibroblasts_CLDN10	AP1S3
4.03815e-12	0.791022	0.5	0.049	1.51002e-07	Fibroblasts_CLDN10	BIRC3
5.16046e-12	1.57404	1	0.281	1.9297e-07	Fibroblasts_CLDN10	EZR
7.53518e-12	0.514443	0.5	0.049	2.81771e-07	Fibroblasts_CLDN10	RGP1
8.1667e-12	0.944886	0.583	0.072	3.05386e-07	Fibroblasts_CLDN10	AHNAK2
8.32373e-12	0.447649	0.417	0.034	3.11257e-07	Fibroblasts_CLDN10	FOSL1
8.38724e-12	0.382677	0.333	0.022	3.13632e-07	Fibroblasts_CLDN10	MEX3A
8.40752e-12	1.9415	1	0.332	3.14391e-07	Fibroblasts_CLDN10	CD44
1.23031e-11	0.707274	0.583	0.071	4.6006e-07	Fibroblasts_CLDN10	MAD2L1BP
1.26048e-11	1.81411	0.917	0.274	4.71345e-07	Fibroblasts_CLDN10	CHMP1B
1.39083e-11	2.6599	0.5	0.055	5.20089e-07	Fibroblasts_CLDN10	TNFRSF11B
1.43547e-11	1.14571	0.75	0.121	5.3678e-07	Fibroblasts_CLDN10	FXYD3
1.59412e-11	0.470139	0.333	0.023	5.96106e-07	Fibroblasts_CLDN10	NOP2
1.64317e-11	0.300274	0.25	0.012	6.14449e-07	Fibroblasts_CLDN10	TIAM1
1.67126e-11	0.468807	0.333	0.023	6.24952e-07	Fibroblasts_CLDN10	CHMP4C
1.84671e-11	0.513145	0.5	0.051	6.9056e-07	Fibroblasts_CLDN10	ZNF675
1.94092e-11	0.511849	0.5	0.051	7.25786e-07	Fibroblasts_CLDN10	MTRNR2L12
2.00378e-11	1.45991	0.833	0.19	7.49293e-07	Fibroblasts_CLDN10	RAB9A
2.03972e-11	0.510553	0.5	0.051	7.62735e-07	Fibroblasts_CLDN10	CREB5
2.48878e-11	0.986428	0.833	0.15	9.30654e-07	Fibroblasts_CLDN10	REL
2.59831e-11	3.19499	1	0.615	9.7161e-07	Fibroblasts_CLDN10	RPS17
2.74893e-11	0.448962	0.417	0.036	1.02794e-06	Fibroblasts_CLDN10	USP6NL
3.41553e-11	1.28557	0.917	0.212	1.2772e-06	Fibroblasts_CLDN10	ZNF91
3.7853e-11	1.06984	0.917	0.215	1.41547e-06	Fibroblasts_CLDN10	CNPY3
4.62402e-11	1.17907	0.833	0.152	1.72911e-06	Fibroblasts_CLDN10	NFIB
4.68895e-11	0.907573	0.667	0.102	1.75339e-06	Fibroblasts_CLDN10	SAYSD1
5.44511e-11	0.377353	0.333	0.024	2.03614e-06	Fibroblasts_CLDN10	MFSD14A
6.23575e-11	0.368084	0.333	0.024	2.3318e-06	Fibroblasts_CLDN10	PROM2
7.36145e-11	0.759412	0.75	0.122	2.75274e-06	Fibroblasts_CLDN10	EFNA1
8.89266e-11	0.586873	0.583	0.073	3.32532e-06	Fibroblasts_CLDN10	TSTD1
8.91432e-11	0.696386	0.75	0.123	3.33342e-06	Fibroblasts_CLDN10	RNF8
1.09622e-10	0.771	0.833	0.157	4.0992e-06	Fibroblasts_CLDN10	PRCC
1.18092e-10	2.38864	1	0.911	4.41592e-06	Fibroblasts_CLDN10	RPL31
1.18727e-10	0.484881	0.167	0.006	4.43966e-06	Fibroblasts_CLDN10	GPR183
1.19061e-10	2.26843	1	0.975	4.45216e-06	Fibroblasts_CLDN10	RPL27A
1.2109e-10	0.784306	1	0.225	4.52805e-06	Fibroblasts_CLDN10	MEA1
1.21204e-10	0.31106	0.167	0.006	4.53232e-06	Fibroblasts_CLDN10	PRSS22
1.22088e-10	1.37039	1	0.714	4.56536e-06	Fibroblasts_CLDN10	MRPL51
1.26336e-10	0.309708	0.167	0.006	4.72422e-06	Fibroblasts_CLDN10	C9orf142
1.2645e-10	0.378682	0.333	0.025	4.72848e-06	Fibroblasts_CLDN10	CYB5R2
1.29516e-10	2.04245	1	0.979	4.84311e-06	Fibroblasts_CLDN10	RPL38
1.30879e-10	0.579518	0.667	0.095	4.89409e-06	Fibroblasts_CLDN10	TPD52L1
1.31077e-10	1.38748	0.917	0.255	4.90148e-06	Fibroblasts_CLDN10	NDUFA9
1.77955e-10	0.668365	0.667	0.101	6.65447e-06	Fibroblasts_CLDN10	ENDOV
1.86912e-10	0.348419	0.333	0.025	6.98941e-06	Fibroblasts_CLDN10	ANXA3
1.88554e-10	1.32746	0.917	0.23	7.05079e-06	Fibroblasts_CLDN10	PTP4A1
2.07238e-10	2.4152	1	0.995	7.74946e-06	Fibroblasts_CLDN10	RPS12
2.12386e-10	2.5723	1	0.648	7.94195e-06	Fibroblasts_CLDN10	MIF
2.87693e-10	1.24161	0.833	0.182	1.0758e-05	Fibroblasts_CLDN10	SOX9
2.90265e-10	0.372049	0.333	0.026	1.08542e-05	Fibroblasts_CLDN10	CBX8
3.10716e-10	2.44249	1	0.994	1.16189e-05	Fibroblasts_CLDN10	RPLP2
3.68547e-10	0.944211	0.833	0.189	1.37815e-05	Fibroblasts_CLDN10	HTATIP2
3.85161e-10	1.83168	1	0.997	1.44027e-05	Fibroblasts_CLDN10	RPL26
4.01797e-10	2.34119	1	1	1.50248e-05	Fibroblasts_CLDN10	EEF1A1
4.04818e-10	1.83154	1	0.764	1.51378e-05	Fibroblasts_CLDN10	CSTB
4.14254e-10	2.12788	1	0.997	1.54906e-05	Fibroblasts_CLDN10	RPL35A
4.17374e-10	1.25159	0.833	0.201	1.56073e-05	Fibroblasts_CLDN10	PON2
4.56279e-10	0.526178	0.417	0.042	1.70621e-05	Fibroblasts_CLDN10	LIG3
5.16168e-10	1.82466	1	0.997	1.93016e-05	Fibroblasts_CLDN10	RPL37A
5.21085e-10	2.12048	1	0.999	1.94855e-05	Fibroblasts_CLDN10	RPS18
5.45543e-10	1.25344	1	0.66	2.04001e-05	Fibroblasts_CLDN10	CUTA
5.51123e-10	2.06241	1	0.999	2.06087e-05	Fibroblasts_CLDN10	RPS15A
5.54213e-10	1.98172	1	0.999	2.07242e-05	Fibroblasts_CLDN10	PTMA
5.81077e-10	2.60977	1	1	2.17288e-05	Fibroblasts_CLDN10	RPL10
5.91216e-10	4.33538	1	0.994	2.21079e-05	Fibroblasts_CLDN10	S100A6
6.06939e-10	2.60625	1	0.996	2.26959e-05	Fibroblasts_CLDN10	RPS27
6.21611e-10	0.947588	0.833	0.187	2.32445e-05	Fibroblasts_CLDN10	HPRT1
6.60858e-10	3.67769	1	0.998	2.47121e-05	Fibroblasts_CLDN10	GAPDH
6.75533e-10	0.658676	0.417	0.043	2.52609e-05	Fibroblasts_CLDN10	TFAP2A
6.79075e-10	2.13199	1	0.993	2.53933e-05	Fibroblasts_CLDN10	RPL37
6.87925e-10	1.66563	1	0.826	2.57243e-05	Fibroblasts_CLDN10	UQCRH
8.01615e-10	1.46277	1	0.805	2.99756e-05	Fibroblasts_CLDN10	SLC25A6
8.0569e-10	0.561612	0.5	0.06	3.0128e-05	Fibroblasts_CLDN10	AIFM1
8.06597e-10	1.51444	1	0.974	3.01619e-05	Fibroblasts_CLDN10	RPS21
8.37026e-10	1.37591	0.667	0.117	3.12998e-05	Fibroblasts_CLDN10	SYNGR1
8.82493e-10	0.740171	0.75	0.14	3.29999e-05	Fibroblasts_CLDN10	HOOK2
8.96557e-10	1.5616	1	0.991	3.35259e-05	Fibroblasts_CLDN10	RPS28
9.39481e-10	1.34984	1	0.39	3.51309e-05	Fibroblasts_CLDN10	SH3KBP1
9.41546e-10	0.701478	0.833	0.165	3.52082e-05	Fibroblasts_CLDN10	DCBLD1
9.654e-10	0.296249	0.25	0.015	3.61002e-05	Fibroblasts_CLDN10	RAB3IP
1.00368e-09	0.292236	0.25	0.015	3.75315e-05	Fibroblasts_CLDN10	TMEM97
1.01841e-09	2.52909	1	0.922	3.80824e-05	Fibroblasts_CLDN10	TPI1
1.24812e-09	1.14988	0.667	0.124	4.66723e-05	Fibroblasts_CLDN10	VMA21
1.27839e-09	0.810457	0.417	0.045	4.78039e-05	Fibroblasts_CLDN10	ARSG
1.34738e-09	3.83138	1	1	5.03839e-05	Fibroblasts_CLDN10	MALAT1
1.41417e-09	0.935243	0.833	0.195	5.28814e-05	Fibroblasts_CLDN10	ACTL6A
1.43051e-09	0.495095	0.5	0.061	5.34926e-05	Fibroblasts_CLDN10	DNAJC24
2.34396e-09	0.677059	0.583	0.089	8.765e-05	Fibroblasts_CLDN10	METTL2B
2.61132e-09	1.62315	1	1	9.76478e-05	Fibroblasts_CLDN10	RPLP1
2.63806e-09	0.438489	0.417	0.044	9.86476e-05	Fibroblasts_CLDN10	CXorf40A
2.73143e-09	1.23548	0.833	0.251	0.000102139	Fibroblasts_CLDN10	SULF2
2.76362e-09	0.298931	0.25	0.016	0.000103343	Fibroblasts_CLDN10	RNASEH1-AS1
3.11184e-09	2.85423	0.917	0.437	0.000116364	Fibroblasts_CLDN10	TMEM45A
3.21329e-09	1.43932	1	0.999	0.000120158	Fibroblasts_CLDN10	RPS15
3.32242e-09	0.285573	0.25	0.016	0.000124239	Fibroblasts_CLDN10	TMC4
3.53903e-09	1.79843	1	1	0.000132338	Fibroblasts_CLDN10	TMSB10
3.69857e-09	1.08432	0.833	0.21	0.000138304	Fibroblasts_CLDN10	CCNC
4.05274e-09	0.799609	0.583	0.094	0.000151548	Fibroblasts_CLDN10	PSME4
4.1164e-09	1.42356	1	1	0.000153929	Fibroblasts_CLDN10	RPL41
4.28232e-09	3.21844	1	0.823	0.000160133	Fibroblasts_CLDN10	CTSD
4.32187e-09	0.429386	0.417	0.045	0.000161612	Fibroblasts_CLDN10	NUP88
4.4171e-09	1.38802	0.917	0.286	0.000165173	Fibroblasts_CLDN10	SPINT2
5.03713e-09	1.01701	0.833	0.208	0.000188359	Fibroblasts_CLDN10	TMEM106C
5.07726e-09	1.41375	1	0.998	0.000189859	Fibroblasts_CLDN10	RPS23
5.35462e-09	0.886477	0.75	0.164	0.000200231	Fibroblasts_CLDN10	CXCL16
5.73936e-09	1.1326	0.833	0.216	0.000214618	Fibroblasts_CLDN10	SVIP
5.77626e-09	1.0148	0.833	0.223	0.000215998	Fibroblasts_CLDN10	OFD1
5.97237e-09	2.36803	1	0.44	0.000223331	Fibroblasts_CLDN10	KRT19
5.97689e-09	0.434581	0.417	0.046	0.0002235	Fibroblasts_CLDN10	RPP21
5.97689e-09	0.434581	0.417	0.046	0.0002235	Fibroblasts_CLDN10	PGAP2
5.97766e-09	0.764136	0.667	0.121	0.000223529	Fibroblasts_CLDN10	DNTTIP1
5.99628e-09	1.74563	1	0.996	0.000224225	Fibroblasts_CLDN10	RPS6
6.02593e-09	0.985271	0.75	0.163	0.000225334	Fibroblasts_CLDN10	CMAS
6.25906e-09	1.50409	1	0.994	0.000234051	Fibroblasts_CLDN10	RPL36
6.32118e-09	1.82827	1	0.787	0.000236374	Fibroblasts_CLDN10	PDIA6
6.54665e-09	1.21104	1	0.994	0.000244806	Fibroblasts_CLDN10	RPL23A
7.16311e-09	0.565431	0.5	0.068	0.000267857	Fibroblasts_CLDN10	NME2
7.20877e-09	1.80794	0.917	0.385	0.000269565	Fibroblasts_CLDN10	SYAP1
8.11043e-09	0.979839	0.667	0.126	0.000303282	Fibroblasts_CLDN10	ELL2
8.3524e-09	1.13169	1	0.945	0.00031233	Fibroblasts_CLDN10	RPS10
8.77472e-09	1.02396	0.667	0.142	0.000328122	Fibroblasts_CLDN10	ING4
9.21649e-09	1.43128	1	0.926	0.000344642	Fibroblasts_CLDN10	RPL23
9.60554e-09	0.96004	0.75	0.181	0.000359189	Fibroblasts_CLDN10	MRPL9
9.77321e-09	1.27401	1	0.997	0.000365459	Fibroblasts_CLDN10	RPL13A
1.00686e-08	0.916486	1	0.982	0.000376505	Fibroblasts_CLDN10	RPL27
1.21191e-08	1.14853	1	0.997	0.000453182	Fibroblasts_CLDN10	RPL21
1.25353e-08	1.71685	1	0.99	0.000468745	Fibroblasts_CLDN10	RPS7
1.30754e-08	0.553936	0.25	0.018	0.000488941	Fibroblasts_CLDN10	NR4A3
1.41143e-08	1.37434	1	0.992	0.000527792	Fibroblasts_CLDN10	RPS13
1.50206e-08	0.545182	0.5	0.07	0.000561679	Fibroblasts_CLDN10	GGH
1.51094e-08	0.557945	0.25	0.018	0.000565002	Fibroblasts_CLDN10	ADPRHL1
1.80067e-08	0.513145	0.417	0.05	0.000673342	Fibroblasts_CLDN10	TTPAL
1.82231e-08	2.45078	1	0.784	0.000681433	Fibroblasts_CLDN10	CD59
1.83219e-08	0.430683	0.417	0.049	0.000685129	Fibroblasts_CLDN10	HOMER1
2.0394e-08	0.420341	0.417	0.049	0.000762613	Fibroblasts_CLDN10	ACSF2
2.13536e-08	0.989861	1	1	0.000798497	Fibroblasts_CLDN10	RPL19
2.17724e-08	1.16132	1	0.999	0.000814155	Fibroblasts_CLDN10	RPL8
2.18417e-08	1.03668	1	0.625	0.000816747	Fibroblasts_CLDN10	SNRPG
2.26339e-08	1.38676	1	0.999	0.000846373	Fibroblasts_CLDN10	TPT1
2.55678e-08	0.839231	0.667	0.141	0.000956082	Fibroblasts_CLDN10	PTPRF
2.7833e-08	0.42163	0.417	0.05	0.00104079	Fibroblasts_CLDN10	BAK1
2.91795e-08	1.2573	1	0.615	0.00109114	Fibroblasts_CLDN10	LDHB
3.40301e-08	1.0423	1	0.58	0.00127252	Fibroblasts_CLDN10	ROMO1
3.42287e-08	0.808719	0.667	0.137	0.00127995	Fibroblasts_CLDN10	MRPS18A
3.45787e-08	1.92094	1	0.777	0.00129304	Fibroblasts_CLDN10	SAT1
3.60972e-08	0.364129	0.333	0.033	0.00134982	Fibroblasts_CLDN10	TTC32
3.69609e-08	0.911671	0.917	0.316	0.00138212	Fibroblasts_CLDN10	KDM5A
3.75909e-08	0.425503	0.417	0.051	0.00140567	Fibroblasts_CLDN10	LMAN2L
3.90297e-08	1.2227	0.833	0.267	0.00145948	Fibroblasts_CLDN10	DNASE2
3.91299e-08	0.949771	0.917	0.309	0.00146322	Fibroblasts_CLDN10	CETN2
4.22285e-08	0.626972	0.75	0.16	0.00157909	Fibroblasts_CLDN10	PTRHD1
4.37311e-08	0.451592	0.333	0.034	0.00163528	Fibroblasts_CLDN10	GPC6
4.82e-08	0.947588	1	0.945	0.00180239	Fibroblasts_CLDN10	PPDPF
5.24846e-08	1.67026	0.917	0.352	0.00196261	Fibroblasts_CLDN10	NR4A1
5.28555e-08	0.608113	0.333	0.035	0.00197648	Fibroblasts_CLDN10	LNX1
5.37946e-08	0.424211	0.417	0.052	0.0020116	Fibroblasts_CLDN10	SND1-IT1
5.37946e-08	0.42163	0.417	0.052	0.0020116	Fibroblasts_CLDN10	TRIM16
5.60753e-08	0.493815	0.417	0.053	0.00209688	Fibroblasts_CLDN10	RAB27B
5.68422e-08	0.994366	0.917	0.671	0.00212556	Fibroblasts_CLDN10	KRTCAP2
5.948e-08	0.910645	0.917	0.3	0.0022242	Fibroblasts_CLDN10	SEPT9
5.96941e-08	1.04107	0.333	0.035	0.0022322	Fibroblasts_CLDN10	S100A1
5.97705e-08	1.18191	1	0.872	0.00223506	Fibroblasts_CLDN10	GSTP1
6.27915e-08	1.41963	1	0.959	0.00234802	Fibroblasts_CLDN10	RPS20
6.57438e-08	1.94867	1	0.451	0.00245842	Fibroblasts_CLDN10	SOD2
6.8726e-08	1.86491	1	0.794	0.00256994	Fibroblasts_CLDN10	CD9
7.0072e-08	0.501516	0.417	0.054	0.00262027	Fibroblasts_CLDN10	CBWD5
7.33341e-08	1.3248	0.917	0.688	0.00274226	Fibroblasts_CLDN10	FKBP2
8.02702e-08	1.12723	1	0.998	0.00300162	Fibroblasts_CLDN10	RPL32
8.2725e-08	0.474739	0.5	0.076	0.00309342	Fibroblasts_CLDN10	MUL1
8.27914e-08	1.63096	0.917	0.513	0.0030959	Fibroblasts_CLDN10	TMED3
8.36125e-08	0.779557	1	0.987	0.00312661	Fibroblasts_CLDN10	UBA52
8.74071e-08	2.40823	1	0.917	0.0032685	Fibroblasts_CLDN10	SSR4
8.85741e-08	1.21002	0.917	0.533	0.00331214	Fibroblasts_CLDN10	MLF2
9.03482e-08	0.426796	0.417	0.054	0.00337848	Fibroblasts_CLDN10	PET117
9.15528e-08	0.59945	0.667	0.133	0.00342352	Fibroblasts_CLDN10	OSER1
9.66592e-08	0.284244	0.25	0.02	0.00361447	Fibroblasts_CLDN10	PRSS8
9.69038e-08	1.04557	1	0.986	0.00362362	Fibroblasts_CLDN10	RPS29
1.00011e-07	0.533916	0.5	0.078	0.0037398	Fibroblasts_CLDN10	FAM213A
1.00971e-07	0.69508	0.833	0.215	0.00377569	Fibroblasts_CLDN10	PMF1
1.02715e-07	1.43672	1	0.74	0.00384093	Fibroblasts_CLDN10	CAST
1.03796e-07	1.13598	1	0.995	0.00388136	Fibroblasts_CLDN10	RPL39
1.04397e-07	1.18666	1	0.996	0.00390383	Fibroblasts_CLDN10	RPL3
1.04431e-07	0.687661	0.75	0.176	0.00390507	Fibroblasts_CLDN10	DDX52
1.2446e-07	1.67061	0.917	0.491	0.00465406	Fibroblasts_CLDN10	ERGIC3
1.31288e-07	0.878355	0.667	0.15	0.00490938	Fibroblasts_CLDN10	PRELID3B
1.32037e-07	0.466145	0.25	0.021	0.00493739	Fibroblasts_CLDN10	ST14
1.42801e-07	0.842227	1	0.767	0.00533989	Fibroblasts_CLDN10	SUB1
1.58664e-07	1.21321	0.667	0.15	0.00593307	Fibroblasts_CLDN10	ELF3
1.65218e-07	0.373373	0.25	0.021	0.00617815	Fibroblasts_CLDN10	DNAH14
1.71929e-07	0.890409	1	0.386	0.00642912	Fibroblasts_CLDN10	STOML2
1.76775e-07	0.652355	0.583	0.112	0.00661033	Fibroblasts_CLDN10	FAM96A
1.82152e-07	1.89206	0.75	0.201	0.00681138	Fibroblasts_CLDN10	CALML5
1.8935e-07	1.21308	0.667	0.161	0.00708054	Fibroblasts_CLDN10	PMAIP1
1.90824e-07	1.09217	1	0.994	0.00713567	Fibroblasts_CLDN10	RPS8
2.07224e-07	1.17676	0.833	0.256	0.00774894	Fibroblasts_CLDN10	BNIP3
2.09854e-07	0.358874	0.333	0.037	0.00784729	Fibroblasts_CLDN10	BCR
2.16279e-07	0.357563	0.333	0.037	0.00808754	Fibroblasts_CLDN10	ZBTB48
2.29391e-07	1.12937	1	0.535	0.00857786	Fibroblasts_CLDN10	FXYD5
2.31092e-07	1.17603	1	0.991	0.00864144	Fibroblasts_CLDN10	RPL10A
2.66363e-07	0.863788	0.917	0.315	0.00996037	Fibroblasts_CLDN10	UPF3A
2.68801e-07	1.16966	1	0.64	0.0100516	Fibroblasts_CLDN10	S100A16
2.81339e-07	0.469695	0.5	0.081	0.0105204	Fibroblasts_CLDN10	SMIM8
3.03584e-07	0.782963	0.75	0.195	0.0113522	Fibroblasts_CLDN10	SLC35B2
3.09633e-07	0.46091	0.5	0.081	0.0115784	Fibroblasts_CLDN10	SOCS6
3.2399e-07	0.4411	0.25	0.022	0.0121153	Fibroblasts_CLDN10	C19orf33
3.28934e-07	0.354944	0.333	0.038	0.0123001	Fibroblasts_CLDN10	PPL
3.53049e-07	0.781509	0.667	0.157	0.0132019	Fibroblasts_CLDN10	RBMX2
3.55198e-07	0.704847	0.583	0.121	0.0132823	Fibroblasts_CLDN10	PYGB
3.5886e-07	1.09019	0.917	0.733	0.0134192	Fibroblasts_CLDN10	VKORC1
3.62575e-07	0.875282	1	0.785	0.0135581	Fibroblasts_CLDN10	NDUFB4
3.83346e-07	0.784867	0.917	0.353	0.0143348	Fibroblasts_CLDN10	DNAJC19
3.849e-07	0.652466	0.667	0.15	0.0143929	Fibroblasts_CLDN10	RPRD2
4.18643e-07	0.99423	1	0.996	0.0156548	Fibroblasts_CLDN10	RPL6
4.37329e-07	1.13756	0.917	0.753	0.0163535	Fibroblasts_CLDN10	BSG
4.39766e-07	0.463414	0.5	0.083	0.0164446	Fibroblasts_CLDN10	NT5C2
5.03888e-07	0.825537	1	0.877	0.0188424	Fibroblasts_CLDN10	OST4
5.31232e-07	1.21899	0.833	0.367	0.0198649	Fibroblasts_CLDN10	SLC25A37
5.5747e-07	0.717766	0.667	0.154	0.020846	Fibroblasts_CLDN10	IGSF8
5.64775e-07	0.492535	0.417	0.061	0.0211192	Fibroblasts_CLDN10	NDUFAF5
6.1636e-07	0.416482	0.417	0.06	0.0230482	Fibroblasts_CLDN10	AKAP1
6.25767e-07	0.657286	1	0.956	0.0233999	Fibroblasts_CLDN10	SUMO2
6.44133e-07	0.356253	0.333	0.04	0.0240867	Fibroblasts_CLDN10	PSEN2
6.5015e-07	1.03032	1	0.802	0.0243117	Fibroblasts_CLDN10	SSR2
6.59331e-07	0.527488	0.333	0.041	0.024655	Fibroblasts_CLDN10	CASC15
6.65592e-07	0.561295	0.583	0.116	0.0248891	Fibroblasts_CLDN10	DAXX
6.72948e-07	0.407517	0.417	0.06	0.0251642	Fibroblasts_CLDN10	HACL1
6.81347e-07	0.353637	0.333	0.04	0.0254783	Fibroblasts_CLDN10	MAPKAPK3
7.01044e-07	0.560342	0.417	0.063	0.0262148	Fibroblasts_CLDN10	AFTPH
7.5851e-07	0.488703	0.417	0.062	0.0283637	Fibroblasts_CLDN10	PRKX
7.74023e-07	0.504296	0.583	0.115	0.0289438	Fibroblasts_CLDN10	FRMD4B
7.82877e-07	0.413915	0.417	0.061	0.0292749	Fibroblasts_CLDN10	UMAD1
8.24397e-07	1.03133	1	0.897	0.0308275	Fibroblasts_CLDN10	UQCRB
8.30338e-07	0.877199	0.667	0.164	0.0310497	Fibroblasts_CLDN10	JMJD6
9.73572e-07	0.438489	0.333	0.042	0.0364058	Fibroblasts_CLDN10	KLC4
1.00486e-06	0.799196	0.833	0.275	0.0375759	Fibroblasts_CLDN10	NBEAL1
1.01631e-06	0.410073	0.417	0.062	0.0380039	Fibroblasts_CLDN10	BEX5
1.02805e-06	0.96893	1	0.991	0.0384429	Fibroblasts_CLDN10	RPL9
1.07082e-06	0.459659	0.5	0.088	0.0400422	Fibroblasts_CLDN10	GGT7
1.11799e-06	1.18976	1	0.905	0.0418061	Fibroblasts_CLDN10	PKM
1.13145e-06	1.09012	1	0.998	0.0423095	Fibroblasts_CLDN10	RPS3A
1.22382e-06	0.521995	0.667	0.151	0.0457636	Fibroblasts_CLDN10	USP5
1.23639e-06	0.972042	0.917	0.522	0.0462335	Fibroblasts_CLDN10	PHB2
1.25969e-06	0.353637	0.333	0.042	0.0471049	Fibroblasts_CLDN10	C6orf136
1.28212e-06	0.629271	0.583	0.127	0.0479435	Fibroblasts_CLDN10	CANT1
1.3098e-06	0.406241	0.417	0.063	0.0489787	Fibroblasts_CLDN10	BRCC3
1.42561e-06	0.380012	0.25	0.025	0.0533091	Fibroblasts_CLDN10	MCTP2
1.43844e-06	1.07649	1	0.999	0.053789	Fibroblasts_CLDN10	RPS14
1.46919e-06	0.48107	0.417	0.065	0.054939	Fibroblasts_CLDN10	PNPLA4
1.46919e-06	0.48107	0.417	0.065	0.054939	Fibroblasts_CLDN10	LIMK2
1.47169e-06	0.920618	0.583	0.137	0.0550325	Fibroblasts_CLDN10	RICTOR
1.6428e-06	1.20579	1	0.998	0.061431	Fibroblasts_CLDN10	RPL34
1.69021e-06	0.617269	0.583	0.128	0.0632036	Fibroblasts_CLDN10	GBA
1.77021e-06	0.286903	0.25	0.025	0.0661952	Fibroblasts_CLDN10	AGBL5
1.78037e-06	0.67961	0.583	0.133	0.0665752	Fibroblasts_CLDN10	CDC42EP4
1.79834e-06	0.528937	0.5	0.094	0.067247	Fibroblasts_CLDN10	TBPL1
1.81784e-06	0.947039	0.917	0.647	0.0679763	Fibroblasts_CLDN10	SUMO1
1.82886e-06	0.686057	0.833	0.267	0.0683885	Fibroblasts_CLDN10	RNF5
1.93525e-06	0.84011	0.75	0.269	0.0723666	Fibroblasts_CLDN10	GUSB
1.9376e-06	0.889272	1	0.809	0.0724546	Fibroblasts_CLDN10	MGST3
1.9405e-06	1.23229	0.917	0.707	0.0725631	Fibroblasts_CLDN10	PNISR
2.10582e-06	0.692875	0.75	0.218	0.078745	Fibroblasts_CLDN10	PFDN6
2.11643e-06	0.648686	0.5	0.096	0.079142	Fibroblasts_CLDN10	LAMB3
2.23357e-06	0.910133	0.917	0.519	0.083522	Fibroblasts_CLDN10	NDUFB5
2.34382e-06	0.745374	0.833	0.304	0.0876446	Fibroblasts_CLDN10	RBBP7
2.4188e-06	0.403692	0.417	0.066	0.0904485	Fibroblasts_CLDN10	TRMT1
2.42301e-06	0.550218	0.417	0.067	0.090606	Fibroblasts_CLDN10	RHBDL2
2.42496e-06	0.845189	0.667	0.17	0.090679	Fibroblasts_CLDN10	SLC2A1
2.43901e-06	0.821056	0.917	0.746	0.0912042	Fibroblasts_CLDN10	WDR83OS
2.4641e-06	0.443498	0.5	0.093	0.0921425	Fibroblasts_CLDN10	ZNF394
2.55602e-06	1.32554	1	0.941	0.0955797	Fibroblasts_CLDN10	COX7C
2.72982e-06	1.10461	0.917	0.68	0.102079	Fibroblasts_CLDN10	ATRAID
2.88477e-06	0.404966	0.417	0.067	0.107873	Fibroblasts_CLDN10	GALT
3.1498e-06	0.452177	0.5	0.095	0.117784	Fibroblasts_CLDN10	C6orf47
3.28694e-06	0.347118	0.333	0.044	0.122912	Fibroblasts_CLDN10	ACAP1
3.5069e-06	2.64789	0.75	0.287	0.131137	Fibroblasts_CLDN10	TM4SF1
3.70475e-06	0.7137	0.75	0.215	0.138536	Fibroblasts_CLDN10	MRPS6
3.70513e-06	0.376025	0.25	0.026	0.13855	Fibroblasts_CLDN10	DUSP16
3.79915e-06	1.03987	1	0.985	0.142065	Fibroblasts_CLDN10	RPL7
3.82686e-06	0.956896	1	0.969	0.143102	Fibroblasts_CLDN10	RPL4
3.91332e-06	1.09377	1	0.991	0.146335	Fibroblasts_CLDN10	NEAT1
4.06617e-06	0.43328	0.333	0.046	0.15205	Fibroblasts_CLDN10	U2AF1
4.09968e-06	0.450934	0.5	0.096	0.153303	Fibroblasts_CLDN10	LRP6
4.11786e-06	0.834932	1	1	0.153983	Fibroblasts_CLDN10	RPL11
4.13479e-06	0.349722	0.333	0.045	0.154616	Fibroblasts_CLDN10	SPSB2
4.20628e-06	0.78839	1	0.69	0.157289	Fibroblasts_CLDN10	ZFAS1
4.24168e-06	0.469695	0.417	0.07	0.158613	Fibroblasts_CLDN10	TCTEX1D2
4.35934e-06	0.653816	0.917	0.345	0.163013	Fibroblasts_CLDN10	UQCC2
4.48917e-06	0.394806	0.417	0.069	0.167868	Fibroblasts_CLDN10	GPR180
4.63277e-06	0.585352	0.583	0.134	0.173238	Fibroblasts_CLDN10	JUP
5.23957e-06	0.434581	0.333	0.047	0.195928	Fibroblasts_CLDN10	NCAPD2
5.39771e-06	0.304309	0.167	0.012	0.201842	Fibroblasts_CLDN10	UNC13D
5.61061e-06	0.678676	1	0.707	0.209803	Fibroblasts_CLDN10	TBCA
5.68218e-06	0.344518	0.333	0.046	0.212479	Fibroblasts_CLDN10	SYCP2
5.85678e-06	0.801787	0.917	0.504	0.219009	Fibroblasts_CLDN10	TUFM
6.07137e-06	0.918075	0.917	0.69	0.227033	Fibroblasts_CLDN10	PRDX2
6.11314e-06	0.732065	0.75	0.238	0.228595	Fibroblasts_CLDN10	MAGEF1
6.1908e-06	1.57054	0.917	0.526	0.231499	Fibroblasts_CLDN10	ITM2C
6.28471e-06	1.01177	0.917	0.53	0.23501	Fibroblasts_CLDN10	C6orf48
6.48343e-06	0.60418	0.583	0.141	0.242441	Fibroblasts_CLDN10	SLC30A9
6.71308e-06	1.21002	1	0.874	0.251029	Fibroblasts_CLDN10	PPIB
6.8089e-06	0.954954	0.583	0.154	0.254612	Fibroblasts_CLDN10	PFKP
6.84512e-06	0.665148	0.833	0.275	0.255966	Fibroblasts_CLDN10	MRPS7
6.93168e-06	0.353637	0.25	0.027	0.259203	Fibroblasts_CLDN10	SDR16C5
7.18524e-06	0.276295	0.25	0.027	0.268685	Fibroblasts_CLDN10	TOMM34
7.18524e-06	0.273655	0.25	0.027	0.268685	Fibroblasts_CLDN10	LINC01001
7.98448e-06	0.677229	0.583	0.138	0.298572	Fibroblasts_CLDN10	YAF2
8.02525e-06	0.637733	0.5	0.106	0.300096	Fibroblasts_CLDN10	TXLNG
8.08804e-06	0.469695	0.417	0.074	0.302444	Fibroblasts_CLDN10	THAP2
8.46552e-06	0.754342	0.917	0.412	0.31656	Fibroblasts_CLDN10	MRPL14
8.62519e-06	0.602996	0.583	0.144	0.32253	Fibroblasts_CLDN10	MAFK
8.82646e-06	0.579518	0.5	0.104	0.330057	Fibroblasts_CLDN10	LDOC1
8.89708e-06	0.859065	0.75	0.255	0.332697	Fibroblasts_CLDN10	MAP3K13
9.00033e-06	0.43487	0.5	0.101	0.336558	Fibroblasts_CLDN10	PIGS
9.16872e-06	0.836172	0.667	0.194	0.342855	Fibroblasts_CLDN10	SHMT2
9.23788e-06	0.505518	0.5	0.104	0.345441	Fibroblasts_CLDN10	MRPL44
9.582e-06	0.612913	0.417	0.077	0.358309	Fibroblasts_CLDN10	GCHFR
9.67587e-06	0.600631	0.583	0.145	0.361819	Fibroblasts_CLDN10	PER2
9.89355e-06	0.759796	1	0.992	0.36996	Fibroblasts_CLDN10	H3F3A
1.02194e-05	0.705296	0.833	0.336	0.382145	Fibroblasts_CLDN10	LTBR
1.05391e-05	1.18386	1	0.925	0.3941	Fibroblasts_CLDN10	S100A10
1.09181e-05	0.273655	0.25	0.028	0.408271	Fibroblasts_CLDN10	CENPW
1.13529e-05	0.704691	1	0.509	0.424532	Fibroblasts_CLDN10	RSL1D1
1.15456e-05	0.735979	1	0.826	0.431737	Fibroblasts_CLDN10	NDUFS5
1.16625e-05	0.62044	0.417	0.078	0.436108	Fibroblasts_CLDN10	CDKN2B
1.25166e-05	0.748208	1	0.83	0.468046	Fibroblasts_CLDN10	COX6B1
1.27804e-05	0.385346	0.167	0.013	0.477912	Fibroblasts_CLDN10	SOX11
1.27871e-05	0.891743	0.667	0.199	0.478159	Fibroblasts_CLDN10	PTPRK
1.28623e-05	0.330304	0.333	0.049	0.480973	Fibroblasts_CLDN10	CNFN
1.38156e-05	0.773069	0.75	0.252	0.516622	Fibroblasts_CLDN10	NAMPT
1.39276e-05	0.666187	0.833	0.291	0.52081	Fibroblasts_CLDN10	MMADHC
1.39349e-05	0.541417	0.333	0.05	0.521081	Fibroblasts_CLDN10	HMGA1
1.40066e-05	0.42292	0.333	0.051	0.523763	Fibroblasts_CLDN10	UBXN2B
1.41484e-05	0.472215	0.417	0.078	0.529067	Fibroblasts_CLDN10	RAB40B
1.41501e-05	1.35098	0.833	0.658	0.529128	Fibroblasts_CLDN10	RPN2
1.48203e-05	0.340628	0.333	0.05	0.554189	Fibroblasts_CLDN10	RHNO1
1.49775e-05	0.980277	1	0.948	0.560069	Fibroblasts_CLDN10	UBB
1.52654e-05	0.547278	0.667	0.184	0.570835	Fibroblasts_CLDN10	CCDC167
1.54043e-05	0.90555	1	0.999	0.576027	Fibroblasts_CLDN10	EIF1
1.60186e-05	0.696386	0.5	0.121	0.599	Fibroblasts_CLDN10	AMZ2
1.68425e-05	0.885639	0.5	0.123	0.62981	Fibroblasts_CLDN10	SLC26A2
1.69675e-05	0.936641	0.833	0.361	0.634483	Fibroblasts_CLDN10	TMEM256
1.70195e-05	0.372049	0.25	0.03	0.636427	Fibroblasts_CLDN10	GCLC
1.71619e-05	0.638946	0.5	0.118	0.641752	Fibroblasts_CLDN10	ZNF431
1.72509e-05	0.710617	0.667	0.203	0.645081	Fibroblasts_CLDN10	TMEM14A
1.82371e-05	0.863902	0.667	0.232	0.68196	Fibroblasts_CLDN10	WIPI1
1.85566e-05	0.336748	0.333	0.051	0.693904	Fibroblasts_CLDN10	SMG5
1.88281e-05	0.559649	0.75	0.233	0.704057	Fibroblasts_CLDN10	SMG1
1.98425e-05	0.924727	0.917	0.503	0.74199	Fibroblasts_CLDN10	NDUFA6
1.98581e-05	0.393541	0.417	0.078	0.742575	Fibroblasts_CLDN10	DIS3L2
1.98581e-05	0.391015	0.417	0.078	0.742575	Fibroblasts_CLDN10	FRMD8
2.12724e-05	0.382206	0.417	0.078	0.795459	Fibroblasts_CLDN10	ADIPOR2
2.12971e-05	1.29224	0.75	0.311	0.796383	Fibroblasts_CLDN10	GLRX
2.13453e-05	0.628006	1	0.789	0.798185	Fibroblasts_CLDN10	COMMD6
2.14697e-05	0.42163	0.333	0.053	0.802836	Fibroblasts_CLDN10	SLC25A25
2.16242e-05	0.276295	0.25	0.03	0.808616	Fibroblasts_CLDN10	CTPS2
2.16242e-05	0.276295	0.25	0.03	0.808616	Fibroblasts_CLDN10	MKS1
2.22178e-05	0.716105	1	0.994	0.830814	Fibroblasts_CLDN10	RPS24
2.35709e-05	0.582095	0.333	0.055	0.881411	Fibroblasts_CLDN10	FOXP4
2.38153e-05	0.462161	0.417	0.08	0.89055	Fibroblasts_CLDN10	CDIP1
2.40779e-05	0.332878	0.333	0.052	0.900371	Fibroblasts_CLDN10	CHML
2.46891e-05	0.463414	0.417	0.08	0.923223	Fibroblasts_CLDN10	HMCES
2.47488e-05	1.0292	0.75	0.397	0.925455	Fibroblasts_CLDN10	CHID1
2.47582e-05	1.00878	0.917	0.503	0.925809	Fibroblasts_CLDN10	RPL22L1
2.51171e-05	0.645873	0.667	0.207	0.939227	Fibroblasts_CLDN10	ECHDC2
2.55604e-05	0.451523	0.583	0.144	0.955807	Fibroblasts_CLDN10	DUSP14
2.56239e-05	0.42292	0.333	0.054	0.958179	Fibroblasts_CLDN10	XPNPEP3
2.64805e-05	0.671377	1	0.997	0.990213	Fibroblasts_CLDN10	RPL15
2.93188e-05	0.384717	0.417	0.079	1	Fibroblasts_CLDN10	OSBPL1A
2.96872e-05	0.327735	0.333	0.053	1	Fibroblasts_CLDN10	SHB
3.03284e-05	0.581849	0.583	0.158	1	Fibroblasts_CLDN10	CDKN1B
3.08642e-05	0.884152	0.583	0.157	1	Fibroblasts_CLDN10	ISG20
3.24073e-05	0.499418	0.5	0.115	1	Fibroblasts_CLDN10	ECSIT
3.24529e-05	1.00628	0.833	0.468	1	Fibroblasts_CLDN10	TECR
3.81479e-05	0.86052	0.917	0.717	1	Fibroblasts_CLDN10	PRDX5
3.82029e-05	0.667746	0.833	0.331	1	Fibroblasts_CLDN10	CDC5L
3.86641e-05	0.43328	0.25	0.032	1	Fibroblasts_CLDN10	SFN
3.97543e-05	0.415198	0.333	0.056	1	Fibroblasts_CLDN10	SFI1
3.98458e-05	0.375947	0.417	0.081	1	Fibroblasts_CLDN10	PGD
4.22368e-05	0.269704	0.25	0.032	1	Fibroblasts_CLDN10	SRD5A1
4.28689e-05	0.383461	0.417	0.082	1	Fibroblasts_CLDN10	CCDC126
4.3067e-05	0.267076	0.25	0.032	1	Fibroblasts_CLDN10	STPG1
4.45822e-05	0.29759	0.167	0.015	1	Fibroblasts_CLDN10	TFPI2
4.51505e-05	0.327735	0.333	0.055	1	Fibroblasts_CLDN10	HK2
4.58909e-05	0.632577	0.667	0.22	1	Fibroblasts_CLDN10	POLR2B
4.60031e-05	0.453422	0.417	0.085	1	Fibroblasts_CLDN10	NAALADL2
4.61582e-05	0.680802	0.75	0.275	1	Fibroblasts_CLDN10	GLRX3
4.71048e-05	0.419054	0.333	0.057	1	Fibroblasts_CLDN10	NFXL1
4.8089e-05	0.534228	1	0.997	1	Fibroblasts_CLDN10	RPL30
4.81563e-05	1.18559	0.833	0.453	1	Fibroblasts_CLDN10	ARID5B
4.94951e-05	0.868367	1	0.994	1	Fibroblasts_CLDN10	RPL18A
5.13566e-05	0.647797	0.583	0.166	1	Fibroblasts_CLDN10	ZNF493
5.15431e-05	0.932638	0.833	0.695	1	Fibroblasts_CLDN10	OS9
5.26109e-05	0.348419	0.25	0.033	1	Fibroblasts_CLDN10	ERBB3
5.48482e-05	0.274974	0.25	0.033	1	Fibroblasts_CLDN10	SLC25A22
5.77429e-05	0.84072	1	0.819	1	Fibroblasts_CLDN10	COX5B
5.81097e-05	0.503319	0.583	0.159	1	Fibroblasts_CLDN10	GDE1
5.84653e-05	0.375947	0.417	0.084	1	Fibroblasts_CLDN10	ARHGAP32
6.00461e-05	0.364129	0.25	0.034	1	Fibroblasts_CLDN10	RHOF
6.06117e-05	0.334167	0.333	0.057	1	Fibroblasts_CLDN10	USP13
6.13929e-05	0.554069	0.5	0.126	1	Fibroblasts_CLDN10	MRPS35
6.16339e-05	0.627326	0.833	0.365	1	Fibroblasts_CLDN10	CFLAR
6.18266e-05	0.330304	0.333	0.057	1	Fibroblasts_CLDN10	SLC12A7
6.18266e-05	0.330304	0.333	0.057	1	Fibroblasts_CLDN10	HINT3
6.2811e-05	0.412918	0.5	0.117	1	Fibroblasts_CLDN10	ASF1A
6.28124e-05	0.581743	0.667	0.203	1	Fibroblasts_CLDN10	MRPL2
6.30539e-05	0.915721	0.833	0.444	1	Fibroblasts_CLDN10	DDOST
6.32107e-05	0.703006	0.75	0.271	1	Fibroblasts_CLDN10	TUSC3
6.39655e-05	0.71214	1	0.969	1	Fibroblasts_CLDN10	ANXA2
6.43226e-05	0.326452	0.333	0.057	1	Fibroblasts_CLDN10	SPRYD4
6.49385e-05	0.651396	1	0.992	1	Fibroblasts_CLDN10	RPS27A
6.80955e-05	0.565613	0.583	0.168	1	Fibroblasts_CLDN10	SAMM50
6.81323e-05	0.383461	0.417	0.086	1	Fibroblasts_CLDN10	DHX8
7.08111e-05	0.36351	0.417	0.085	1	Fibroblasts_CLDN10	RCHY1
7.08251e-05	0.731974	0.583	0.185	1	Fibroblasts_CLDN10	EMG1
7.09194e-05	0.660543	1	0.995	1	Fibroblasts_CLDN10	RPL5
7.10125e-05	0.379699	0.417	0.086	1	Fibroblasts_CLDN10	ZNF267
7.11339e-05	0.334167	0.333	0.058	1	Fibroblasts_CLDN10	GFOD2
7.27554e-05	0.520714	0.75	0.254	1	Fibroblasts_CLDN10	PGM1
7.47126e-05	0.452177	0.417	0.089	1	Fibroblasts_CLDN10	RAD1
7.57135e-05	0.821772	0.583	0.171	1	Fibroblasts_CLDN10	CAT
7.82343e-05	0.692252	0.583	0.171	1	Fibroblasts_CLDN10	COA6
7.82669e-05	0.821013	0.833	0.435	1	Fibroblasts_CLDN10	SLC3A2
8.0551e-05	0.60418	0.833	0.376	1	Fibroblasts_CLDN10	SFT2D1
8.19996e-05	0.412918	0.5	0.12	1	Fibroblasts_CLDN10	RBM4
8.21182e-05	0.377197	0.417	0.087	1	Fibroblasts_CLDN10	ARHGEF9
8.37842e-05	0.408085	0.5	0.12	1	Fibroblasts_CLDN10	C12orf45
8.43311e-05	0.448451	0.417	0.09	1	Fibroblasts_CLDN10	RPP25L
8.4621e-05	0.755665	0.917	0.518	1	Fibroblasts_CLDN10	ZC3H15
8.49924e-05	0.444734	0.417	0.089	1	Fibroblasts_CLDN10	NUP153
8.80228e-05	0.327735	0.333	0.059	1	Fibroblasts_CLDN10	NFKBIE
9.21153e-05	0.555564	1	0.99	1	Fibroblasts_CLDN10	LGALS1
9.27876e-05	0.373451	0.417	0.088	1	Fibroblasts_CLDN10	EDEM2
9.59624e-05	0.985242	0.833	0.587	1	Fibroblasts_CLDN10	NUCB2
9.82495e-05	0.907573	0.583	0.181	1	Fibroblasts_CLDN10	THUMPD3-AS1
9.85578e-05	0.365989	0.417	0.088	1	Fibroblasts_CLDN10	AKAP8
9.97562e-05	0.618465	0.5	0.127	1	Fibroblasts_CLDN10	ZBTB43
9.99848e-05	0.477668	0.5	0.127	1	Fibroblasts_CLDN10	WDR11
0.000100359	0.433965	0.583	0.16	1	Fibroblasts_CLDN10	BLCAP
0.000100626	0.450276	0.25	0.036	1	Fibroblasts_CLDN10	RERG
0.000102726	1.0359	0.5	0.14	1	Fibroblasts_CLDN10	AREG
0.000106198	0.326452	0.333	0.06	1	Fibroblasts_CLDN10	TMLHE
0.000106198	0.32261	0.333	0.06	1	Fibroblasts_CLDN10	LINC00662
0.000111943	1.12076	0.917	0.521	1	Fibroblasts_CLDN10	IL32
0.000112745	0.482473	0.5	0.129	1	Fibroblasts_CLDN10	TIAM2
0.000117521	0.403268	0.5	0.123	1	Fibroblasts_CLDN10	ABT1
0.000117613	0.370959	0.417	0.09	1	Fibroblasts_CLDN10	PEMT
0.000118009	0.625059	0.75	0.282	1	Fibroblasts_CLDN10	UPF2
0.000118268	0.476469	0.5	0.129	1	Fibroblasts_CLDN10	CCDC91
0.000119826	0.617812	0.583	0.177	1	Fibroblasts_CLDN10	KIN
0.000125825	0.296249	0.167	0.017	1	Fibroblasts_CLDN10	PTGS1
0.000125839	0.38802	0.167	0.017	1	Fibroblasts_CLDN10	FRZB
0.000126051	0.269704	0.25	0.036	1	Fibroblasts_CLDN10	AP1G2
0.000130536	0.264453	0.25	0.036	1	Fibroblasts_CLDN10	SNHG10
0.000130536	0.263143	0.25	0.036	1	Fibroblasts_CLDN10	MVK
0.000131956	0.370959	0.417	0.091	1	Fibroblasts_CLDN10	MRPL45
0.000133274	0.478868	0.5	0.13	1	Fibroblasts_CLDN10	CCDC127
0.000133828	0.650848	1	0.789	1	Fibroblasts_CLDN10	RBM39
0.000134016	0.587692	0.5	0.138	1	Fibroblasts_CLDN10	SMS
0.000134242	0.509074	0.667	0.218	1	Fibroblasts_CLDN10	ARSA
0.000135164	0.259221	0.25	0.036	1	Fibroblasts_CLDN10	TTI1
0.000138699	0.590564	0.417	0.101	1	Fibroblasts_CLDN10	MBOAT2
0.000140542	1.02217	0.917	0.897	1	Fibroblasts_CLDN10	LGALS3
0.000143982	0.32389	0.333	0.061	1	Fibroblasts_CLDN10	TJAP1
0.000143982	0.32389	0.333	0.061	1	Fibroblasts_CLDN10	ZNF107
0.000146637	0.320054	0.333	0.061	1	Fibroblasts_CLDN10	FOXJ2
0.000147288	0.408794	0.333	0.063	1	Fibroblasts_CLDN10	MYNN
0.000147956	0.787278	1	0.806	1	Fibroblasts_CLDN10	TMEM258
0.000150858	0.472879	0.5	0.131	1	Fibroblasts_CLDN10	QARS
0.000153466	0.476152	1	0.746	1	Fibroblasts_CLDN10	COX8A
0.000160852	0.522737	0.417	0.099	1	Fibroblasts_CLDN10	ZDHHC9
0.000160957	0.369715	0.333	0.062	1	Fibroblasts_CLDN10	SYNGR2
0.000160995	0.672084	0.667	0.248	1	Fibroblasts_CLDN10	LMBRD1
0.000161117	0.949844	0.5	0.145	1	Fibroblasts_CLDN10	DUSP4
0.000162131	0.327735	0.333	0.062	1	Fibroblasts_CLDN10	ZNF268
0.000163931	0.261835	0.25	0.037	1	Fibroblasts_CLDN10	TMEM53
0.000163931	0.265764	0.25	0.037	1	Fibroblasts_CLDN10	PRKAR1B
0.000163931	0.263143	0.25	0.037	1	Fibroblasts_CLDN10	SHTN1
0.00016649	0.29977	0.333	0.061	1	Fibroblasts_CLDN10	CYB5R4
0.000166746	0.264453	0.25	0.037	1	Fibroblasts_CLDN10	RNF139-AS1
0.000168089	0.32389	0.333	0.062	1	Fibroblasts_CLDN10	ZMIZ2
0.000169366	0.472879	0.5	0.132	1	Fibroblasts_CLDN10	TES
0.000169366	0.471684	0.5	0.132	1	Fibroblasts_CLDN10	CTSH
0.000171141	0.318778	0.333	0.062	1	Fibroblasts_CLDN10	TMEM63B
0.000172525	0.515332	0.417	0.099	1	Fibroblasts_CLDN10	ABCF3
0.000178878	0.947178	0.75	0.405	1	Fibroblasts_CLDN10	ARF5
0.000179342	0.658492	1	0.99	1	Fibroblasts_CLDN10	RPS25
0.000181575	0.875432	0.75	0.469	1	Fibroblasts_CLDN10	ZNF292
0.000182396	0.520264	0.417	0.1	1	Fibroblasts_CLDN10	AKIP1
0.000182573	0.586873	0.417	0.104	1	Fibroblasts_CLDN10	TPMT
0.000183852	0.314956	0.333	0.062	1	Fibroblasts_CLDN10	ITPR3
0.000192075	0.43733	0.417	0.096	1	Fibroblasts_CLDN10	NFIL3
0.00019373	0.538537	0.5	0.14	1	Fibroblasts_CLDN10	QSER1
0.000195393	0.321332	0.333	0.063	1	Fibroblasts_CLDN10	AARSD1
0.000195393	0.320054	0.333	0.063	1	Fibroblasts_CLDN10	SGSM3
0.000198471	1.57875	0.75	0.647	1	Fibroblasts_CLDN10	SCPEP1
0.000199755	0.96431	0.667	0.287	1	Fibroblasts_CLDN10	SMOC1
0.000202435	0.311145	0.333	0.063	1	Fibroblasts_CLDN10	ETV3
0.00020414	0.670574	0.583	0.197	1	Fibroblasts_CLDN10	PTPN2
0.000208074	0.399877	0.333	0.065	1	Fibroblasts_CLDN10	UTP20
0.00020848	0.362272	0.417	0.095	1	Fibroblasts_CLDN10	MRPL30
0.000227653	1.16996	0.75	0.362	1	Fibroblasts_CLDN10	PLSCR1
0.000229972	0.433641	0.417	0.098	1	Fibroblasts_CLDN10	TMEM63A
0.000230542	0.731768	0.917	0.581	1	Fibroblasts_CLDN10	ERP29
0.000231237	0.394876	0.5	0.131	1	Fibroblasts_CLDN10	MMGT1
0.000238849	0.623658	0.833	0.414	1	Fibroblasts_CLDN10	FUNDC2
0.000241379	1.25066	0.667	0.284	1	Fibroblasts_CLDN10	C2orf40
0.000254912	0.264453	0.25	0.039	1	Fibroblasts_CLDN10	TSTD3
0.000258841	0.471684	0.5	0.139	1	Fibroblasts_CLDN10	IMMP1L
0.000262351	0.761722	1	0.782	1	Fibroblasts_CLDN10	COX7A2
0.000262879	0.611771	0.667	0.243	1	Fibroblasts_CLDN10	SPTY2D1
0.000263337	0.520951	0.25	0.04	1	Fibroblasts_CLDN10	CP
0.000264264	0.419809	1	0.998	1	Fibroblasts_CLDN10	RPS4X
0.000273062	0.976735	0.833	0.414	1	Fibroblasts_CLDN10	EIF2S3
0.000297441	0.403692	0.333	0.068	1	Fibroblasts_CLDN10	ABCA5
0.000298101	0.534512	0.75	0.302	1	Fibroblasts_CLDN10	NOP58
0.00030014	0.385346	1	0.997	1	Fibroblasts_CLDN10	RPL35
0.000303549	0.735425	0.5	0.147	1	Fibroblasts_CLDN10	TXNRD1
0.000310853	0.265764	0.25	0.04	1	Fibroblasts_CLDN10	FAM222B
0.000315829	0.263143	0.25	0.04	1	Fibroblasts_CLDN10	EDC3
0.000320588	0.819909	0.833	0.554	1	Fibroblasts_CLDN10	CYCS
0.000320876	0.263143	0.25	0.04	1	Fibroblasts_CLDN10	B9D1
0.0003221	0.735376	1	0.825	1	Fibroblasts_CLDN10	SEC61G
0.000328982	0.658324	0.5	0.155	1	Fibroblasts_CLDN10	NRIP1
0.000337262	0.320054	0.333	0.067	1	Fibroblasts_CLDN10	RHBDD3
0.000342953	0.313685	0.333	0.067	1	Fibroblasts_CLDN10	LRIF1
0.000343734	0.405167	0.583	0.176	1	Fibroblasts_CLDN10	SCNM1
0.000345788	0.460975	0.5	0.142	1	Fibroblasts_CLDN10	FZD3
0.000346498	0.397339	0.333	0.069	1	Fibroblasts_CLDN10	RRAS2
0.000347413	0.530349	0.667	0.247	1	Fibroblasts_CLDN10	PPP1R11
0.000363635	0.348726	0.417	0.099	1	Fibroblasts_CLDN10	NUP98
0.000365753	0.59945	0.5	0.149	1	Fibroblasts_CLDN10	ST3GAL1
0.000370769	0.403692	0.333	0.07	1	Fibroblasts_CLDN10	PHKG2
0.000370801	1.10707	0.75	0.557	1	Fibroblasts_CLDN10	BCAP31
0.000379302	0.385346	0.5	0.137	1	Fibroblasts_CLDN10	ACOX1
0.000380479	1.24663	0.417	0.112	1	Fibroblasts_CLDN10	GJB2
0.000381563	0.48107	0.333	0.07	1	Fibroblasts_CLDN10	ZNF43
0.000381779	0.264453	0.25	0.041	1	Fibroblasts_CLDN10	SIRT5
0.000384599	0.399877	0.333	0.07	1	Fibroblasts_CLDN10	RPIA
0.000386014	0.353637	0.417	0.1	1	Fibroblasts_CLDN10	RAB30-AS1
0.000399934	0.257916	0.25	0.041	1	Fibroblasts_CLDN10	SLC25A44
0.000400751	0.704513	0.833	0.454	1	Fibroblasts_CLDN10	EIF3M
0.000416727	0.545002	0.583	0.19	1	Fibroblasts_CLDN10	GLMP
0.000419427	0.867926	0.833	0.727	1	Fibroblasts_CLDN10	TMED10
0.000421023	0.880423	0.583	0.208	1	Fibroblasts_CLDN10	NR4A2
0.000423377	0.651298	0.5	0.159	1	Fibroblasts_CLDN10	FBXO3
0.000426293	0.534807	0.583	0.2	1	Fibroblasts_CLDN10	UGGT2
0.00043041	0.531424	0.583	0.199	1	Fibroblasts_CLDN10	ZFC3H1
0.000441589	0.412026	0.583	0.182	1	Fibroblasts_CLDN10	N4BP1
0.000443616	0.598538	0.583	0.2	1	Fibroblasts_CLDN10	CWC25
0.000447918	0.426293	0.417	0.105	1	Fibroblasts_CLDN10	SYNE2
0.000459326	0.309877	0.333	0.069	1	Fibroblasts_CLDN10	STYXL1
0.000466831	0.349722	0.25	0.043	1	Fibroblasts_CLDN10	CGNL1
0.000471991	0.261835	0.25	0.042	1	Fibroblasts_CLDN10	CCDC30
0.000472793	0.5325	0.667	0.257	1	Fibroblasts_CLDN10	CREBBP
0.000484703	0.812546	0.5	0.168	1	Fibroblasts_CLDN10	GMDS
0.000486171	0.559072	0.333	0.075	1	Fibroblasts_CLDN10	LRRC23
0.000487637	0.456241	0.5	0.147	1	Fibroblasts_CLDN10	BRMS1
0.000491351	0.357331	0.417	0.103	1	Fibroblasts_CLDN10	NFX1
0.000497537	0.34261	0.417	0.102	1	Fibroblasts_CLDN10	PACSIN2
0.000513355	0.378239	0.5	0.141	1	Fibroblasts_CLDN10	SCAMP3
0.000517155	0.349952	0.417	0.103	1	Fibroblasts_CLDN10	SNAP47
0.000528036	0.470073	0.583	0.194	1	Fibroblasts_CLDN10	UBXN2A
0.000528632	0.648101	0.583	0.216	1	Fibroblasts_CLDN10	HINT2
0.000531383	1.2913	0.667	0.255	1	Fibroblasts_CLDN10	APOD
0.000533944	0.640919	0.667	0.256	1	Fibroblasts_CLDN10	ASCC3
0.00053958	0.52713	0.667	0.262	1	Fibroblasts_CLDN10	ACO2
0.000539793	0.523562	0.583	0.204	1	Fibroblasts_CLDN10	RPAIN
0.000540472	0.52082	0.5	0.156	1	Fibroblasts_CLDN10	TIMM44
0.000545787	1.72159	0.417	0.123	1	Fibroblasts_CLDN10	RAMP1
0.000551404	0.316229	0.333	0.071	1	Fibroblasts_CLDN10	TMEM69
0.000557809	0.447211	0.333	0.074	1	Fibroblasts_CLDN10	WEE1
0.000565959	0.942406	1	0.783	1	Fibroblasts_CLDN10	ADIRF
0.000567143	0.634342	0.917	0.539	1	Fibroblasts_CLDN10	RBM8A
0.000569946	0.257916	0.25	0.043	1	Fibroblasts_CLDN10	KDM4A
0.000573707	0.429963	0.417	0.109	1	Fibroblasts_CLDN10	RNASEH1
0.000575794	0.521323	0.583	0.205	1	Fibroblasts_CLDN10	ETV6
0.000578442	0.252708	0.25	0.043	1	Fibroblasts_CLDN10	MTHFD2L
0.000587048	0.250111	0.25	0.043	1	Fibroblasts_CLDN10	PAQR4
0.000593023	0.427515	0.417	0.109	1	Fibroblasts_CLDN10	KMT2E-AS1
0.000595768	0.251409	0.25	0.043	1	Fibroblasts_CLDN10	TIGAR
0.000605087	0.590676	0.583	0.195	1	Fibroblasts_CLDN10	SF3B4
0.000632881	0.497981	1	0.996	1	Fibroblasts_CLDN10	RPL7A
0.000654802	0.617299	0.833	0.799	1	Fibroblasts_CLDN10	NDUFA13
0.000657331	0.381788	0.5	0.146	1	Fibroblasts_CLDN10	TULP3
0.000661224	0.309877	0.333	0.072	1	Fibroblasts_CLDN10	PIK3CB
0.00066909	0.456537	0.583	0.196	1	Fibroblasts_CLDN10	PC
0.000671561	0.30103	0.333	0.072	1	Fibroblasts_CLDN10	ACOT8
0.00068691	0.393541	0.333	0.075	1	Fibroblasts_CLDN10	CC2D1A
0.000697947	0.313685	0.333	0.073	1	Fibroblasts_CLDN10	MTMR3
0.00070131	0.767766	0.417	0.115	1	Fibroblasts_CLDN10	ARL5B
0.00070189	0.873059	0.583	0.233	1	Fibroblasts_CLDN10	FABP5
0.000703106	0.250111	0.25	0.043	1	Fibroblasts_CLDN10	RUBCN
0.000708792	0.311145	0.333	0.073	1	Fibroblasts_CLDN10	UQCC1
0.000728603	0.397339	0.333	0.076	1	Fibroblasts_CLDN10	RABIF
0.000731624	0.449579	1	0.999	1	Fibroblasts_CLDN10	RPS9
0.000732117	0.444474	0.5	0.153	1	Fibroblasts_CLDN10	DKC1
0.000742905	0.439794	0.5	0.152	1	Fibroblasts_CLDN10	FAM104A
0.000744913	0.496377	1	0.857	1	Fibroblasts_CLDN10	TOMM7
0.000772099	0.724595	1	0.753	1	Fibroblasts_CLDN10	LGALS3BP
0.00077478	0.596919	0.917	0.806	1	Fibroblasts_CLDN10	C4orf3
0.000789843	0.34322	0.25	0.045	1	Fibroblasts_CLDN10	ATP11A
0.000793304	0.340171	0.417	0.108	1	Fibroblasts_CLDN10	TAF6
0.00079734	0.344518	0.25	0.045	1	Fibroblasts_CLDN10	FANCF
0.000801166	0.410499	0.417	0.112	1	Fibroblasts_CLDN10	RIPK2
0.000803731	0.581001	0.917	0.682	1	Fibroblasts_CLDN10	MRPS21
0.00081285	0.257916	0.25	0.044	1	Fibroblasts_CLDN10	GCFC2
0.00081285	0.25531	0.25	0.044	1	Fibroblasts_CLDN10	APBA3
0.000824444	0.254008	0.25	0.044	1	Fibroblasts_CLDN10	DUSP18
0.000830335	1.43261	0.833	0.683	1	Fibroblasts_CLDN10	IER3
0.000844555	0.452053	0.583	0.201	1	Fibroblasts_CLDN10	UBE2F
0.000846806	0.338953	0.417	0.109	1	Fibroblasts_CLDN10	RBM12
0.000856355	0.552697	0.75	0.525	1	Fibroblasts_CLDN10	RAB1A
0.000863978	0.536162	0.417	0.12	1	Fibroblasts_CLDN10	SEC11C
0.00086925	0.367644	0.5	0.148	1	Fibroblasts_CLDN10	DERA
0.00087533	0.421415	0.417	0.113	1	Fibroblasts_CLDN10	PRKCI
0.000877504	0.564921	0.75	0.352	1	Fibroblasts_CLDN10	SNRPC
0.000878853	0.374699	0.5	0.149	1	Fibroblasts_CLDN10	LCMT1
0.00088332	0.415341	0.417	0.113	1	Fibroblasts_CLDN10	TMEM70
0.000894667	0.416553	0.417	0.113	1	Fibroblasts_CLDN10	GART
0.00089843	0.715589	0.75	0.418	1	Fibroblasts_CLDN10	WNK1
0.000934888	0.62124	0.5	0.171	1	Fibroblasts_CLDN10	LTA4H
0.000935105	0.49387	0.75	0.336	1	Fibroblasts_CLDN10	COPS7A
0.000936309	0.684449	0.917	0.695	1	Fibroblasts_CLDN10	EIF1AX
0.000942894	0.454293	0.583	0.205	1	Fibroblasts_CLDN10	CORO1C
0.000974276	0.25531	0.25	0.045	1	Fibroblasts_CLDN10	ZNF883
0.000987853	0.252708	0.25	0.045	1	Fibroblasts_CLDN10	SMOX
0.000991787	0.382206	0.333	0.078	1	Fibroblasts_CLDN10	SSH2
0.00101385	0.287236	0.333	0.075	1	Fibroblasts_CLDN10	SLC6A8
0.00102495	0.63265	0.833	0.467	1	Fibroblasts_CLDN10	FAM162A
0.00102544	0.619811	0.667	0.275	1	Fibroblasts_CLDN10	ABRACL
0.001027	0.572688	0.75	0.353	1	Fibroblasts_CLDN10	CARHSP1
0.00103284	0.30103	0.333	0.076	1	Fibroblasts_CLDN10	ERCC3
0.00104299	0.645178	0.833	0.605	1	Fibroblasts_CLDN10	NDUFAB1
0.00104814	0.295998	0.333	0.076	1	Fibroblasts_CLDN10	C12orf4
0.00104897	0.804411	0.75	0.428	1	Fibroblasts_CLDN10	HIF1A
0.00106123	0.385975	0.333	0.078	1	Fibroblasts_CLDN10	SNHG19
0.00107229	0.442132	0.5	0.16	1	Fibroblasts_CLDN10	SMARCE1
0.00107299	0.498687	0.5	0.166	1	Fibroblasts_CLDN10	ZNF791
0.00107592	0.317056	1	0.997	1	Fibroblasts_CLDN10	NACA
0.00108093	0.649393	0.917	0.758	1	Fibroblasts_CLDN10	NDUFA1
0.00108262	0.34322	0.25	0.047	1	Fibroblasts_CLDN10	BARD1
0.00108481	0.454667	0.833	0.41	1	Fibroblasts_CLDN10	ACP1
0.00110523	0.34261	0.417	0.112	1	Fibroblasts_CLDN10	MFN1
0.00110732	0.881682	0.917	0.767	1	Fibroblasts_CLDN10	CD151
0.0011102	0.367644	0.5	0.152	1	Fibroblasts_CLDN10	FBXO32
0.0011287	0.25531	0.25	0.046	1	Fibroblasts_CLDN10	SETDB1
0.00113068	0.304814	0.333	0.077	1	Fibroblasts_CLDN10	SNX16
0.00113832	0.437576	1	0.991	1	Fibroblasts_CLDN10	RPL22
0.001148	0.54278	0.667	0.295	1	Fibroblasts_CLDN10	FZD7
0.0011938	0.679982	0.917	0.577	1	Fibroblasts_CLDN10	CNPY2
0.00121799	0.475948	0.75	0.343	1	Fibroblasts_CLDN10	NDUFA10
0.00122789	0.483094	1	0.993	1	Fibroblasts_CLDN10	RPL14
0.00123546	0.438626	0.5	0.162	1	Fibroblasts_CLDN10	DPCD
0.00124593	0.903087	0.75	0.677	1	Fibroblasts_CLDN10	LMAN2
0.00124819	0.791914	0.583	0.236	1	Fibroblasts_CLDN10	ARIH1
0.00124854	0.33652	0.417	0.113	1	Fibroblasts_CLDN10	PIGH
0.00125359	0.532334	0.833	0.447	1	Fibroblasts_CLDN10	SNRPN
0.00127907	0.439794	0.5	0.163	1	Fibroblasts_CLDN10	CCDC130
0.00129181	0.483592	1	0.994	1	Fibroblasts_CLDN10	RPS3
0.00134328	0.507965	0.833	0.666	1	Fibroblasts_CLDN10	NDUFB10
0.00134791	0.318403	0.417	0.113	1	Fibroblasts_CLDN10	ARL6IP6
0.00139873	0.648757	0.833	0.619	1	Fibroblasts_CLDN10	ATF4
0.00140092	0.378447	0.333	0.081	1	Fibroblasts_CLDN10	GOLPH3L
0.00141749	0.262489	0.167	0.023	1	Fibroblasts_CLDN10	NPW
0.00142433	0.335305	0.417	0.115	1	Fibroblasts_CLDN10	G6PD
0.00144737	0.476661	0.833	0.459	1	Fibroblasts_CLDN10	SDHC
0.0014968	0.412918	0.417	0.121	1	Fibroblasts_CLDN10	CSTF3
0.00149949	0.975776	1	1	1	Fibroblasts_CLDN10	H3F3B
0.00150745	0.298512	0.333	0.079	1	Fibroblasts_CLDN10	CCDC159
0.00159667	0.734241	0.75	0.405	1	Fibroblasts_CLDN10	ANKRD10
0.00159799	0.462161	0.333	0.086	1	Fibroblasts_CLDN10	SIRT6
0.00160486	0.450934	0.833	0.416	1	Fibroblasts_CLDN10	AHI1
0.00161032	0.561759	0.833	0.422	1	Fibroblasts_CLDN10	YME1L1
0.0016172	0.51824	0.75	0.41	1	Fibroblasts_CLDN10	STRAP
0.0016184	0.338953	0.417	0.117	1	Fibroblasts_CLDN10	GABPB2
0.00162039	0.352476	0.5	0.158	1	Fibroblasts_CLDN10	RAB5B
0.00164148	0.521821	0.917	0.484	1	Fibroblasts_CLDN10	UGP2
0.0016427	0.337736	0.417	0.117	1	Fibroblasts_CLDN10	ZNF430
0.00165703	0.494071	1	0.994	1	Fibroblasts_CLDN10	RPL29
0.00167869	0.629271	0.5	0.175	1	Fibroblasts_CLDN10	FXYD6
0.00168294	0.297254	0.333	0.08	1	Fibroblasts_CLDN10	MKKS
0.00170781	0.716207	0.5	0.195	1	Fibroblasts_CLDN10	SH3YL1
0.00176172	0.406879	0.417	0.123	1	Fibroblasts_CLDN10	NHSL2
0.0017787	0.428159	0.5	0.168	1	Fibroblasts_CLDN10	SLC41A3
0.00178023	0.378239	0.917	0.463	1	Fibroblasts_CLDN10	TIMM13
0.00181459	0.6645	0.583	0.248	1	Fibroblasts_CLDN10	BRIX1
0.00186096	0.404052	1	0.961	1	Fibroblasts_CLDN10	CHCHD2
0.00187101	0.252284	1	0.972	1	Fibroblasts_CLDN10	CFL1
0.00187164	0.514048	0.667	0.305	1	Fibroblasts_CLDN10	YTHDC1
0.00191467	0.339333	0.25	0.051	1	Fibroblasts_CLDN10	TEX30
0.00194625	0.30103	0.333	0.082	1	Fibroblasts_CLDN10	TP53BP2
0.00194905	0.774727	0.917	0.786	1	Fibroblasts_CLDN10	UQCRQ
0.00197174	0.488703	0.75	0.383	1	Fibroblasts_CLDN10	FAM204A
0.00200615	0.251409	0.25	0.05	1	Fibroblasts_CLDN10	CTPS1
0.00210796	0.322008	0.417	0.12	1	Fibroblasts_CLDN10	CDKL5
0.00218823	0.477268	0.583	0.233	1	Fibroblasts_CLDN10	GNL1
0.00218842	0.295998	0.333	0.083	1	Fibroblasts_CLDN10	RBM4B
0.00222034	0.326829	0.417	0.121	1	Fibroblasts_CLDN10	SLC50A1
0.0022304	0.403268	0.417	0.127	1	Fibroblasts_CLDN10	ASCC2
0.00223209	0.540462	0.5	0.18	1	Fibroblasts_CLDN10	DNAJC4
0.00227745	0.417767	0.5	0.173	1	Fibroblasts_CLDN10	ZBTB4
0.00227987	0.499128	0.583	0.225	1	Fibroblasts_CLDN10	PIGP
0.00240332	0.346684	0.5	0.165	1	Fibroblasts_CLDN10	BCCIP
0.00241284	0.481614	0.583	0.239	1	Fibroblasts_CLDN10	HMOX2
0.00241874	0.398031	0.75	0.336	1	Fibroblasts_CLDN10	PRDX3
0.0024291	0.369715	0.333	0.087	1	Fibroblasts_CLDN10	STIM1
0.00245985	0.334167	0.25	0.053	1	Fibroblasts_CLDN10	LINC00665
0.00246085	0.431494	1	0.845	1	Fibroblasts_CLDN10	TMA7
0.00247212	0.42163	0.25	0.055	1	Fibroblasts_CLDN10	IFT122
0.00251477	0.743818	1	0.992	1	Fibroblasts_CLDN10	RPS16
0.0025404	0.351316	0.5	0.167	1	Fibroblasts_CLDN10	SMIM12
0.00261474	0.331794	0.583	0.212	1	Fibroblasts_CLDN10	SSSCA1
0.00263115	0.420502	0.833	0.444	1	Fibroblasts_CLDN10	TRAPPC1
0.00264034	0.289734	0.333	0.085	1	Fibroblasts_CLDN10	FARP2
0.00266433	0.478028	0.5	0.185	1	Fibroblasts_CLDN10	DUSP23
0.00270717	0.260528	0.167	0.026	1	Fibroblasts_CLDN10	SLC44A4
0.002775	0.492535	0.583	0.231	1	Fibroblasts_CLDN10	AP1S1
0.0027913	0.453367	0.75	0.371	1	Fibroblasts_CLDN10	ABCF1
0.00282076	0.326452	0.25	0.054	1	Fibroblasts_CLDN10	TOM1L1
0.0028731	0.287236	0.333	0.086	1	Fibroblasts_CLDN10	B4GALT3
0.00290108	0.475271	0.417	0.138	1	Fibroblasts_CLDN10	ZNF830
0.00297302	0.554381	0.75	0.496	1	Fibroblasts_CLDN10	TMEM98
0.00299219	0.392488	0.417	0.13	1	Fibroblasts_CLDN10	AQP3
0.00302776	0.33804	0.25	0.055	1	Fibroblasts_CLDN10	ITPKC
0.00306601	0.370462	0.667	0.274	1	Fibroblasts_CLDN10	STX10
0.00309275	0.317203	0.417	0.126	1	Fibroblasts_CLDN10	NEDD9
0.00312446	0.390103	0.417	0.131	1	Fibroblasts_CLDN10	ACTR6
0.00313188	0.354738	0.583	0.219	1	Fibroblasts_CLDN10	DDX27
0.00313735	0.416958	0.833	0.571	1	Fibroblasts_CLDN10	SNRPE
0.00313908	0.49387	0.667	0.331	1	Fibroblasts_CLDN10	PFDN4
0.00320021	0.416727	0.667	0.29	1	Fibroblasts_CLDN10	TRIP12
0.00320124	0.284742	0.333	0.087	1	Fibroblasts_CLDN10	ZZEF1
0.00323226	0.536892	0.75	0.429	1	Fibroblasts_CLDN10	DARS
0.00325233	0.393682	0.417	0.132	1	Fibroblasts_CLDN10	SNAPC3
0.00326182	0.579518	1	0.812	1	Fibroblasts_CLDN10	RPL36A
0.00330691	0.35915	0.583	0.222	1	Fibroblasts_CLDN10	PNPLA8
0.00331477	0.462161	0.417	0.139	1	Fibroblasts_CLDN10	FAM104B
0.00332856	0.542597	0.917	0.704	1	Fibroblasts_CLDN10	MYDGF
0.00333133	0.31122	0.417	0.127	1	Fibroblasts_CLDN10	CD2AP
0.00335792	0.542381	0.75	0.439	1	Fibroblasts_CLDN10	PLOD1
0.00339996	0.342068	0.5	0.173	1	Fibroblasts_CLDN10	ABI1
0.00342147	0.559033	0.833	0.676	1	Fibroblasts_CLDN10	TMCO1
0.00343765	0.43894	0.833	0.521	1	Fibroblasts_CLDN10	CHD4
0.00348063	0.394876	0.417	0.134	1	Fibroblasts_CLDN10	NUDT2
0.00350452	0.586522	0.917	0.73	1	Fibroblasts_CLDN10	C19orf53
0.00355845	0.276047	0.333	0.088	1	Fibroblasts_CLDN10	RPRD1B
0.00361891	0.413402	0.583	0.235	1	Fibroblasts_CLDN10	EMC6
0.00363726	0.41432	0.5	0.183	1	Fibroblasts_CLDN10	PRKAG1
0.00366449	0.285988	0.333	0.089	1	Fibroblasts_CLDN10	PITRM1
0.00367554	0.578122	0.917	0.708	1	Fibroblasts_CLDN10	HSPE1
0.00368181	0.307641	0.417	0.128	1	Fibroblasts_CLDN10	CCNK
0.00370695	0.699661	0.833	0.648	1	Fibroblasts_CLDN10	DEK
0.00375329	0.509628	0.75	0.566	1	Fibroblasts_CLDN10	PIGT
0.00377297	0.393682	0.417	0.135	1	Fibroblasts_CLDN10	SDR39U1
0.00378634	0.354867	0.333	0.092	1	Fibroblasts_CLDN10	MCM7
0.00379144	0.335457	0.25	0.057	1	Fibroblasts_CLDN10	E2F6
0.00382006	0.314807	0.417	0.129	1	Fibroblasts_CLDN10	TMEM60
0.00386495	0.288484	0.333	0.09	1	Fibroblasts_CLDN10	ZRSR2
0.00391142	0.519647	0.75	0.444	1	Fibroblasts_CLDN10	POLR1D
0.00391452	0.460975	0.417	0.142	1	Fibroblasts_CLDN10	NDRG2
0.00392117	0.518474	0.417	0.148	1	Fibroblasts_CLDN10	ZMYND8
0.00399078	0.406308	0.5	0.185	1	Fibroblasts_CLDN10	WBP4
0.00405745	0.540916	0.833	0.614	1	Fibroblasts_CLDN10	TALDO1
0.00405963	0.284742	0.333	0.09	1	Fibroblasts_CLDN10	PRPF3
0.00406798	0.397206	0.5	0.184	1	Fibroblasts_CLDN10	IFT43
0.00407822	0.33059	0.5	0.176	1	Fibroblasts_CLDN10	USP7
0.00420989	0.307641	0.417	0.13	1	Fibroblasts_CLDN10	RUSC1
0.00422391	0.282252	0.333	0.091	1	Fibroblasts_CLDN10	NRAS
0.00425956	0.367459	0.917	0.896	1	Fibroblasts_CLDN10	HINT1
0.00427932	0.36723	0.333	0.095	1	Fibroblasts_CLDN10	RSPH3
0.00430473	0.51076	0.75	0.417	1	Fibroblasts_CLDN10	PDLIM5
0.00445692	0.581616	0.833	0.721	1	Fibroblasts_CLDN10	PRDX4
0.00449545	0.452177	0.333	0.095	1	Fibroblasts_CLDN10	THAP9-AS1
0.00460657	0.46431	0.583	0.259	1	Fibroblasts_CLDN10	ATXN1
0.00463184	0.295777	0.417	0.131	1	Fibroblasts_CLDN10	DCAF10
0.00463185	0.293416	0.417	0.131	1	Fibroblasts_CLDN10	NDUFA7
0.00465332	0.328306	0.5	0.178	1	Fibroblasts_CLDN10	PRPF38A
0.00477131	0.304072	0.417	0.132	1	Fibroblasts_CLDN10	FMR1
0.0048303	0.447211	0.75	0.43	1	Fibroblasts_CLDN10	PSMD13
0.0048906	0.337794	0.75	0.341	1	Fibroblasts_CLDN10	DNAJB11
0.0049288	0.515332	0.333	0.1	1	Fibroblasts_CLDN10	NAV2
0.00496633	0.307006	1	0.741	1	Fibroblasts_CLDN10	RBX1
0.0049763	0.307641	0.417	0.133	1	Fibroblasts_CLDN10	TRAPPC6A
0.00504622	0.378361	0.917	0.709	1	Fibroblasts_CLDN10	NDUFB8
0.00518236	0.46894	0.5	0.19	1	Fibroblasts_CLDN10	COQ10B
0.00519781	0.738915	0.667	0.64	1	Fibroblasts_CLDN10	GRN
0.0052161	0.352331	0.167	0.029	1	Fibroblasts_CLDN10	CST6
0.00523116	1.04201	0.667	0.403	1	Fibroblasts_CLDN10	AGR2
0.00526708	0.282252	0.333	0.094	1	Fibroblasts_CLDN10	PCNT
0.00527277	0.447806	0.75	0.468	1	Fibroblasts_CLDN10	TXNDC17
0.0052803	0.406477	0.917	0.586	1	Fibroblasts_CLDN10	ATP6V1F
0.00528626	0.985271	0.417	0.156	1	Fibroblasts_CLDN10	QPCT
0.0052945	0.413915	0.25	0.06	1	Fibroblasts_CLDN10	DXO
0.00532938	0.281009	0.333	0.094	1	Fibroblasts_CLDN10	ATL2
0.00532938	0.277286	0.333	0.094	1	Fibroblasts_CLDN10	S100PBP
0.005389	0.300511	0.417	0.134	1	Fibroblasts_CLDN10	OARD1
0.00539193	0.280264	0.167	0.029	1	Fibroblasts_CLDN10	STK26
0.00543398	0.630284	0.583	0.282	1	Fibroblasts_CLDN10	CDKN1A
0.00547297	0.310026	0.417	0.135	1	Fibroblasts_CLDN10	SRRT
0.00554201	0.381788	0.417	0.142	1	Fibroblasts_CLDN10	HBS1L
0.00558592	0.452533	0.583	0.263	1	Fibroblasts_CLDN10	XIAP
0.00565346	0.281009	0.333	0.095	1	Fibroblasts_CLDN10	GOT2
0.0056841	0.411352	0.25	0.062	1	Fibroblasts_CLDN10	OSGIN2
0.00573247	0.581966	0.833	0.585	1	Fibroblasts_CLDN10	NDUFA5
0.0058041	0.466677	0.5	0.194	1	Fibroblasts_CLDN10	KLHL24
0.00597348	0.395244	0.917	0.557	1	Fibroblasts_CLDN10	GTF2A2
0.006014	0.381643	0.917	0.972	1	Fibroblasts_CLDN10	BTF3
0.0061139	0.412633	0.25	0.063	1	Fibroblasts_CLDN10	AAGAB
0.00614306	0.65715	0.417	0.162	1	Fibroblasts_CLDN10	TAPBPL
0.00617234	0.573662	0.667	0.357	1	Fibroblasts_CLDN10	CHMP2B
0.00622509	0.390699	0.583	0.25	1	Fibroblasts_CLDN10	CTBP2
0.00625323	0.450402	0.583	0.269	1	Fibroblasts_CLDN10	IPO7
0.00640354	0.582578	0.583	0.307	1	Fibroblasts_CLDN10	UBAC2
0.00643027	0.375878	0.417	0.145	1	Fibroblasts_CLDN10	PRPF18
0.00650763	0.30229	0.25	0.06	1	Fibroblasts_CLDN10	SFRP1
0.00650871	0.32389	0.25	0.061	1	Fibroblasts_CLDN10	DNASE1
0.00653342	0.368817	0.417	0.144	1	Fibroblasts_CLDN10	SUMF1
0.00659828	0.318778	0.25	0.061	1	Fibroblasts_CLDN10	LDLR
0.00667653	0.353637	0.917	0.607	1	Fibroblasts_CLDN10	PSMB6
0.00673541	0.298142	0.417	0.139	1	Fibroblasts_CLDN10	MRPL37
0.00676273	0.463142	0.667	0.366	1	Fibroblasts_CLDN10	LSM8
0.00676299	0.546393	0.75	0.488	1	Fibroblasts_CLDN10	TM9SF2
0.00677729	0.275935	1	0.992	1	Fibroblasts_CLDN10	FAU
0.00692649	0.384783	0.5	0.198	1	Fibroblasts_CLDN10	RING1
0.00695694	0.375878	0.417	0.147	1	Fibroblasts_CLDN10	WDR74
0.00709471	0.269869	0.333	0.097	1	Fibroblasts_CLDN10	EXOSC3
0.00721997	0.487747	0.667	0.395	1	Fibroblasts_CLDN10	ZBTB38
0.00730495	0.329628	0.583	0.241	1	Fibroblasts_CLDN10	AIG1
0.00749101	0.274809	0.333	0.098	1	Fibroblasts_CLDN10	SH2B1
0.00750527	0.311145	0.25	0.062	1	Fibroblasts_CLDN10	SEZ6L2
0.00757276	0.452701	0.417	0.148	1	Fibroblasts_CLDN10	ETNK1
0.00786523	0.360623	0.833	0.497	1	Fibroblasts_CLDN10	RAD23A
0.00791123	0.760881	0.667	0.36	1	Fibroblasts_CLDN10	VEGFA
0.00818333	0.316937	0.5	0.191	1	Fibroblasts_CLDN10	VEZF1
0.00825117	0.348726	0.333	0.104	1	Fibroblasts_CLDN10	IFI27L1
0.00825565	0.38321	0.583	0.258	1	Fibroblasts_CLDN10	ZNF24
0.00825704	0.262489	0.333	0.099	1	Fibroblasts_CLDN10	MUT
0.00827026	0.516132	0.417	0.159	1	Fibroblasts_CLDN10	IPO5
0.00837667	0.393266	0.75	0.424	1	Fibroblasts_CLDN10	MRPL18
0.00838932	0.609932	0.667	0.36	1	Fibroblasts_CLDN10	AKR1C3
0.00840184	0.298142	0.417	0.144	1	Fibroblasts_CLDN10	CRYZL1
0.00843726	0.795534	1	0.999	1	Fibroblasts_CLDN10	RPS19
0.0084774	0.795572	0.75	0.568	1	Fibroblasts_CLDN10	LAMP2
0.00860812	0.354867	0.333	0.105	1	Fibroblasts_CLDN10	ING3
0.00870066	0.353637	0.333	0.105	1	Fibroblasts_CLDN10	CEP83
0.00876758	0.276047	0.333	0.101	1	Fibroblasts_CLDN10	CRELD1
0.00886314	0.274809	0.333	0.101	1	Fibroblasts_CLDN10	ARV1
0.00894858	0.412808	0.667	0.346	1	Fibroblasts_CLDN10	ACSL3
0.00901469	0.435994	0.917	1	1	Fibroblasts_CLDN10	RPL28
0.00920673	0.366471	0.417	0.152	1	Fibroblasts_CLDN10	DYRK4
0.00933371	0.423852	0.333	0.111	1	Fibroblasts_CLDN10	TMEM159
0.00935386	0.260038	0.333	0.101	1	Fibroblasts_CLDN10	BPGM
0.00936091	0.435361	0.5	0.217	1	Fibroblasts_CLDN10	GPR108
0.00949905	0.480526	0.5	0.229	1	Fibroblasts_CLDN10	WBP2
0.00983437	0.260038	0.333	0.102	1	Fibroblasts_CLDN10	OGDH
3.48204e-59	0.85784	0.986	0.558	1.30207e-54	Fibroblasts_ASPN	ASPN
1.2223e-48	0.75766	0.986	0.657	4.57068e-44	Fibroblasts_ASPN	SFRP4
4.1339e-43	0.673775	0.932	0.489	1.54583e-38	Fibroblasts_ASPN	MMP2
1.98426e-38	0.647057	0.945	0.576	7.41992e-34	Fibroblasts_ASPN	FBLN1
1.29275e-32	0.420884	1	0.824	4.83409e-28	Fibroblasts_ASPN	SERPINF1
2.26149e-32	0.547862	0.95	0.593	8.45663e-28	Fibroblasts_ASPN	OMD
3.89233e-32	0.511441	0.922	0.546	1.4555e-27	Fibroblasts_ASPN	LRRC15
9.04344e-31	0.421526	0.968	0.75	3.3817e-26	Fibroblasts_ASPN	CTSK
2.96354e-30	0.513273	0.877	0.462	1.10819e-25	Fibroblasts_ASPN	FNDC1
7.52379e-30	0.492078	0.658	0.249	2.81345e-25	Fibroblasts_ASPN	PDGFRL
5.03126e-27	0.531044	0.84	0.449	1.88139e-22	Fibroblasts_ASPN	CRTAC1
1.11173e-26	0.443955	0.854	0.455	4.15722e-22	Fibroblasts_ASPN	SRPX
2.63563e-26	0.549774	1	0.642	9.85567e-22	Fibroblasts_ASPN	IBSP
4.57631e-25	0.276527	1	0.901	1.71127e-20	Fibroblasts_ASPN	DCN
1.63241e-23	0.372523	0.973	0.731	6.10422e-19	Fibroblasts_ASPN	HTRA1
3.4736e-22	0.393486	0.858	0.53	1.29892e-17	Fibroblasts_ASPN	RUNX2
4.10325e-21	0.355863	0.776	0.434	1.53437e-16	Fibroblasts_ASPN	PODNL1
6.35168e-21	0.404712	0.977	0.731	2.37515e-16	Fibroblasts_ASPN	COL12A1
7.37819e-21	0.349653	0.982	0.771	2.759e-16	Fibroblasts_ASPN	CFH
3.41425e-20	0.378585	0.973	0.705	1.27673e-15	Fibroblasts_ASPN	NBL1
7.69534e-20	0.408847	0.89	0.561	2.87759e-15	Fibroblasts_ASPN	CTHRC1
1.03956e-19	0.337996	0.808	0.474	3.88731e-15	Fibroblasts_ASPN	DPYSL3
1.8157e-19	0.34318	0.553	0.24	6.78962e-15	Fibroblasts_ASPN	GXYLT2
3.35872e-19	0.341644	0.566	0.248	1.25596e-14	Fibroblasts_ASPN	ITGB2
9.25926e-19	0.448842	0.58	0.262	3.46241e-14	Fibroblasts_ASPN	WISP2
1.17205e-18	0.345989	0.89	0.582	4.38276e-14	Fibroblasts_ASPN	PLEKHA5
1.49154e-18	0.311711	0.717	0.358	5.57747e-14	Fibroblasts_ASPN	PTPRD
2.14598e-18	0.337257	0.895	0.555	8.02468e-14	Fibroblasts_ASPN	NRP2
3.44762e-18	0.376519	0.708	0.353	1.2892e-13	Fibroblasts_ASPN	DPT
4.50975e-18	0.356091	0.868	0.563	1.68638e-13	Fibroblasts_ASPN	GJA1
1.07851e-17	0.341036	0.982	0.758	4.03298e-13	Fibroblasts_ASPN	C1R
1.40183e-17	0.296679	0.877	0.524	5.242e-13	Fibroblasts_ASPN	SDC1
2.28893e-17	0.303822	0.986	0.824	8.55922e-13	Fibroblasts_ASPN	AEBP1
3.427e-17	0.347006	0.959	0.671	1.28149e-12	Fibroblasts_ASPN	ITGBL1
6.21143e-17	0.272291	0.991	0.827	2.3227e-12	Fibroblasts_ASPN	PCOLCE
1.51336e-16	0.366375	0.881	0.58	5.65906e-12	Fibroblasts_ASPN	OLFML2B
2.27934e-16	0.337623	0.945	0.676	8.52337e-12	Fibroblasts_ASPN	THBS2
2.2865e-16	0.338608	0.721	0.431	8.55014e-12	Fibroblasts_ASPN	LIMCH1
9.73048e-16	0.40463	0.521	0.242	3.63862e-11	Fibroblasts_ASPN	OGN
1.00207e-15	0.314528	0.598	0.295	3.74713e-11	Fibroblasts_ASPN	COL8A2
1.29084e-15	0.253225	0.977	0.758	4.82695e-11	Fibroblasts_ASPN	CTSZ
1.7627e-15	0.296959	0.84	0.553	6.59145e-11	Fibroblasts_ASPN	ANTXR1
2.06234e-15	0.30452	0.991	0.765	7.71191e-11	Fibroblasts_ASPN	C1S
2.85129e-15	0.360819	0.932	0.639	1.06621e-10	Fibroblasts_ASPN	COL11A1
3.14861e-15	0.328178	0.858	0.576	1.17739e-10	Fibroblasts_ASPN	COLEC12
1.09926e-14	0.270279	0.868	0.562	4.11057e-10	Fibroblasts_ASPN	ECM2
1.79033e-14	0.288701	0.635	0.341	6.69478e-10	Fibroblasts_ASPN	PDGFD
2.0362e-14	0.271045	0.89	0.662	7.61418e-10	Fibroblasts_ASPN	EMP2
2.79005e-14	0.298688	0.457	0.203	1.04331e-09	Fibroblasts_ASPN	CILP2
4.04133e-14	0.269926	0.968	0.761	1.51122e-09	Fibroblasts_ASPN	TIMP2
4.13564e-14	0.379178	0.703	0.414	1.54648e-09	Fibroblasts_ASPN	HLA-DRA
6.25586e-14	0.264787	0.785	0.494	2.33932e-09	Fibroblasts_ASPN	MDK
6.55666e-14	0.301042	0.836	0.578	2.4518e-09	Fibroblasts_ASPN	FRMD6
8.36564e-14	0.345008	0.699	0.404	3.12825e-09	Fibroblasts_ASPN	HLA-DRB1
9.9511e-14	0.290184	0.658	0.374	3.72111e-09	Fibroblasts_ASPN	ALDH2
1.37073e-13	0.298634	0.936	0.727	5.1257e-09	Fibroblasts_ASPN	FGFR1
1.39462e-13	0.267066	0.703	0.423	5.21505e-09	Fibroblasts_ASPN	GLT8D2
1.80287e-13	0.317642	0.676	0.385	6.74164e-09	Fibroblasts_ASPN	RARRES2
2.53508e-13	0.29441	0.781	0.499	9.47969e-09	Fibroblasts_ASPN	GPNMB
3.1502e-13	0.277815	0.991	0.793	1.17799e-08	Fibroblasts_ASPN	SERPING1
3.30435e-13	0.294665	0.621	0.354	1.23563e-08	Fibroblasts_ASPN	MEGF10
3.55151e-13	0.269071	0.42	0.186	1.32805e-08	Fibroblasts_ASPN	TNFRSF19
3.87995e-13	0.28295	0.982	0.798	1.45087e-08	Fibroblasts_ASPN	NNMT
1.03503e-12	0.337302	0.699	0.45	3.87038e-08	Fibroblasts_ASPN	RGS3
1.24175e-12	0.264966	0.63	0.358	4.6434e-08	Fibroblasts_ASPN	FLNB
1.31923e-12	0.267538	0.808	0.514	4.93314e-08	Fibroblasts_ASPN	ADAMTS2
1.57797e-12	0.307177	0.84	0.549	5.90068e-08	Fibroblasts_ASPN	GAS6
1.59393e-12	0.269042	0.694	0.418	5.96033e-08	Fibroblasts_ASPN	WNT5B
1.74599e-12	0.260552	0.731	0.451	6.52894e-08	Fibroblasts_ASPN	PLXDC2
2.16778e-12	0.263459	0.744	0.469	8.1062e-08	Fibroblasts_ASPN	IL32
2.18213e-12	0.279922	0.63	0.376	8.15986e-08	Fibroblasts_ASPN	RARRES3
2.69105e-12	0.259698	0.753	0.479	1.00629e-07	Fibroblasts_ASPN	CTSF
5.09958e-12	0.280662	0.534	0.284	1.90694e-07	Fibroblasts_ASPN	GAS1
5.61017e-12	0.257124	0.502	0.257	2.09787e-07	Fibroblasts_ASPN	GLIS2
5.99129e-12	0.270931	0.982	0.77	2.24038e-07	Fibroblasts_ASPN	FBN1
6.10356e-12	0.259858	0.438	0.209	2.28236e-07	Fibroblasts_ASPN	TSPAN11
7.29212e-12	0.296761	0.479	0.243	2.72682e-07	Fibroblasts_ASPN	SMOC1
7.50937e-12	0.254946	0.973	0.766	2.80806e-07	Fibroblasts_ASPN	LRP1
9.32353e-12	0.310887	0.662	0.404	3.48644e-07	Fibroblasts_ASPN	VCAM1
9.5809e-12	0.309516	0.868	0.615	3.58268e-07	Fibroblasts_ASPN	CD74
1.14772e-11	0.283148	0.877	0.643	4.29177e-07	Fibroblasts_ASPN	MXRA5
1.34874e-11	0.25093	0.507	0.263	5.0435e-07	Fibroblasts_ASPN	FAM20A
2.41164e-11	0.27684	0.854	0.572	9.0181e-07	Fibroblasts_ASPN	TNC
2.42108e-11	0.26179	0.584	0.337	9.0534e-07	Fibroblasts_ASPN	RIN2
2.80615e-11	0.251348	0.95	0.697	1.04933e-06	Fibroblasts_ASPN	MRC2
4.07582e-11	0.281925	0.694	0.459	1.52411e-06	Fibroblasts_ASPN	TWIST1
4.09861e-11	0.287517	0.776	0.488	1.53263e-06	Fibroblasts_ASPN	CXCL12
5.94332e-11	0.266537	0.598	0.367	2.22244e-06	Fibroblasts_ASPN	IL1R1
7.55365e-11	0.269745	0.963	0.752	2.82461e-06	Fibroblasts_ASPN	COL8A1
8.93254e-11	0.286192	0.785	0.551	3.34023e-06	Fibroblasts_ASPN	FGF7
1.59593e-10	0.279922	0.589	0.361	5.96783e-06	Fibroblasts_ASPN	HLA-DPB1
1.60227e-10	0.258945	0.653	0.412	5.99153e-06	Fibroblasts_ASPN	KIAA1217
1.64895e-10	0.254946	0.817	0.558	6.1661e-06	Fibroblasts_ASPN	TMEM119
2.11854e-10	0.301605	0.831	0.548	7.92208e-06	Fibroblasts_ASPN	COL10A1
2.72488e-10	0.262875	0.973	0.718	1.01894e-05	Fibroblasts_ASPN	LTBP2
3.17828e-10	0.330638	0.137	0.032	1.18849e-05	Fibroblasts_ASPN	CD177
3.3233e-10	0.305688	0.612	0.371	1.24271e-05	Fibroblasts_ASPN	DIO2
5.52029e-10	0.258198	0.858	0.604	2.06426e-05	Fibroblasts_ASPN	CYP1B1
6.65167e-10	0.258425	0.845	0.602	2.48732e-05	Fibroblasts_ASPN	SELENOP
6.71798e-10	0.279709	0.589	0.354	2.51212e-05	Fibroblasts_ASPN	LEPR
8.60025e-10	0.252027	0.498	0.284	3.21598e-05	Fibroblasts_ASPN	SPOCK1
1.4616e-09	0.266922	0.986	0.774	5.4655e-05	Fibroblasts_ASPN	PRSS23
1.67694e-09	0.324022	0.973	0.678	6.27074e-05	Fibroblasts_ASPN	COMP
1.95821e-09	0.288377	0.539	0.341	7.32252e-05	Fibroblasts_ASPN	PLAT
5.59316e-09	0.280856	0.89	0.61	0.00020915	Fibroblasts_ASPN	TAGLN
1.84489e-08	0.293378	0.224	0.087	0.000689877	Fibroblasts_ASPN	MMP13
1.85905e-08	0.272912	0.648	0.405	0.000695173	Fibroblasts_ASPN	SPP1
7.56413e-29	0.517445	0.774	0.373	2.82853e-24	Fibroblasts_IBSP	PGF
7.99982e-21	0.386133	0.925	0.71	2.99145e-16	Fibroblasts_IBSP	ANKH
9.69e-19	0.459411	0.92	0.66	3.62348e-14	Fibroblasts_IBSP	IBSP
1.47536e-16	0.346165	0.509	0.233	5.51695e-12	Fibroblasts_IBSP	FGF1
3.2819e-16	0.423724	0.788	0.521	1.22723e-11	Fibroblasts_IBSP	ENPP1
4.41226e-16	0.318632	0.522	0.244	1.64992e-11	Fibroblasts_IBSP	BMP8B
1.50741e-14	0.424368	0.761	0.5	5.63679e-10	Fibroblasts_IBSP	CPE
5.76793e-14	0.4059	0.376	0.161	2.15686e-09	Fibroblasts_IBSP	WIF1
2.74243e-13	0.286906	0.814	0.573	1.0255e-08	Fibroblasts_IBSP	BHLHE40
3.03163e-13	0.280982	0.81	0.588	1.13365e-08	Fibroblasts_IBSP	TGFB1
3.87515e-13	0.258697	0.903	0.752	1.44907e-08	Fibroblasts_IBSP	MFGE8
5.77978e-13	0.358393	0.504	0.27	2.16129e-08	Fibroblasts_IBSP	TP53I11
6.18178e-13	0.313347	0.487	0.246	2.31161e-08	Fibroblasts_IBSP	S1PR3
1.35973e-12	0.278845	0.296	0.11	5.08458e-08	Fibroblasts_IBSP	NTRK3
5.6832e-12	0.374816	0.717	0.495	2.12517e-07	Fibroblasts_IBSP	IGFBP3
6.25646e-12	0.291941	0.929	0.741	2.33954e-07	Fibroblasts_IBSP	TGFBI
2.32235e-11	0.269319	0.819	0.639	8.68421e-07	Fibroblasts_IBSP	CRIP1
2.72909e-11	0.290712	0.898	0.707	1.02052e-06	Fibroblasts_IBSP	COL18A1
4.62385e-11	0.270529	0.814	0.594	1.72904e-06	Fibroblasts_IBSP	SLC29A1
8.87537e-11	0.370135	0.765	0.563	3.31886e-06	Fibroblasts_IBSP	COL10A1
1.10166e-10	0.270958	0.814	0.614	4.11954e-06	Fibroblasts_IBSP	FAT1
3.05365e-10	0.267474	0.956	0.81	1.14188e-05	Fibroblasts_IBSP	SERPINE2
3.10595e-10	0.25082	0.42	0.217	1.16144e-05	Fibroblasts_IBSP	CDH15
3.45193e-10	0.289054	0.628	0.415	1.29082e-05	Fibroblasts_IBSP	PTGES
1.14685e-09	0.261821	0.628	0.415	4.28854e-05	Fibroblasts_IBSP	ITGA10
3.35422e-09	0.265097	0.447	0.248	0.000125428	Fibroblasts_IBSP	OLFML2A
1.45425e-08	0.40599	0.606	0.415	0.000543803	Fibroblasts_IBSP	SPP1
1.57499e-08	0.251083	0.894	0.704	0.000588952	Fibroblasts_IBSP	SULF1
2.55378e-08	0.315958	0.655	0.467	0.000954962	Fibroblasts_IBSP	DDIT4
2.26265e-06	0.264942	0.496	0.328	0.0846096	Fibroblasts_IBSP	VEGFA
1.41673e-69	1.21691	1	1	5.29773e-65	Fibroblasts_KRT19	MT-ND1
5.70636e-69	1.21339	1	1	2.13384e-64	Fibroblasts_KRT19	MT-ATP6
2.8624e-68	1.09838	1	0.994	1.07037e-63	Fibroblasts_KRT19	MT-ND3
1.04614e-67	1.1997	1	1	3.91192e-63	Fibroblasts_KRT19	MT-ND2
6.97405e-66	1.18092	1	0.999	2.60787e-61	Fibroblasts_KRT19	MT-CYB
5.45798e-65	1.15666	1	1	2.04096e-60	Fibroblasts_KRT19	MT-ND4
2.71778e-63	1.23696	1	1	1.01629e-58	Fibroblasts_KRT19	MT-CO3
7.40899e-63	1.08814	1	1	2.77052e-58	Fibroblasts_KRT19	MT-CO1
2.86674e-60	1.17502	1	1	1.07199e-55	Fibroblasts_KRT19	MT-CO2
1.34379e-59	1.43675	0.966	0.962	5.02498e-55	Fibroblasts_KRT19	MUCL1
6.46931e-56	0.866451	1	0.994	2.41914e-51	Fibroblasts_KRT19	B2M
1.19035e-54	1.00532	1	1	4.45118e-50	Fibroblasts_KRT19	EEF1A1
1.69602e-50	0.490724	1	1	6.34209e-46	Fibroblasts_KRT19	MALAT1
3.56141e-50	0.933548	1	1	1.33175e-45	Fibroblasts_KRT19	TMSB10
3.55096e-48	0.95191	0.855	0.211	1.32784e-43	Fibroblasts_KRT19	KRT18
1.49628e-45	1.01754	1	0.999	5.59519e-41	Fibroblasts_KRT19	RPS18
1.27638e-41	0.977827	1	1	4.77289e-37	Fibroblasts_KRT19	RPLP1
2.13277e-41	0.633942	0.957	0.933	7.97528e-37	Fibroblasts_KRT19	S100A4
1.1394e-39	0.920212	1	1	4.26066e-35	Fibroblasts_KRT19	RPL41
1.99616e-39	0.881449	1	0.999	7.46443e-35	Fibroblasts_KRT19	TPT1
7.09299e-38	1.21417	0.957	0.384	2.65235e-33	Fibroblasts_KRT19	KRT19
1.69672e-37	0.816623	1	0.99	6.34471e-33	Fibroblasts_KRT19	MT-ND5
2.53213e-37	0.907143	1	1	9.46866e-33	Fibroblasts_KRT19	RPL10
4.1441e-36	0.519403	0.906	0.931	1.54964e-31	Fibroblasts_KRT19	SPARC
1.44577e-33	0.837393	1	0.995	5.40631e-29	Fibroblasts_KRT19	RPS12
6.25728e-33	0.404209	0.889	0.962	2.33985e-28	Fibroblasts_KRT19	VIM
4.99883e-32	0.910918	1	0.999	1.86926e-27	Fibroblasts_KRT19	RPL13
2.21471e-31	0.858372	1	0.992	8.28167e-27	Fibroblasts_KRT19	FTH1
1.03273e-30	0.846026	0.991	0.992	3.86178e-26	Fibroblasts_KRT19	TMSB4X
6.11327e-30	0.922712	0.991	0.996	2.286e-25	Fibroblasts_KRT19	ACTB
2.10334e-29	0.982496	0.991	0.953	7.86523e-25	Fibroblasts_KRT19	MGP
2.23724e-27	0.875306	1	0.998	8.36593e-23	Fibroblasts_KRT19	SERF2
4.27128e-25	0.351439	0.88	0.948	1.5972e-20	Fibroblasts_KRT19	LUM
1.39175e-24	1.02808	0.641	0.222	5.20432e-20	Fibroblasts_KRT19	KRT8
4.64e-22	0.821028	0.991	0.997	1.73508e-17	Fibroblasts_KRT19	MYL6
1.19466e-21	0.332142	0.846	0.942	4.46732e-17	Fibroblasts_KRT19	COL1A2
1.28791e-21	0.852179	0.991	0.999	4.81602e-17	Fibroblasts_KRT19	RPL32
3.3529e-21	0.922466	1	0.994	1.25378e-16	Fibroblasts_KRT19	RPL18A
8.35474e-21	0.853624	0.991	0.993	3.12417e-16	Fibroblasts_KRT19	RPS27A
3.54411e-20	0.844983	0.991	0.994	1.32528e-15	Fibroblasts_KRT19	UBC
1.03787e-19	0.846493	0.991	0.995	3.88101e-15	Fibroblasts_KRT19	RPS24
1.3068e-19	0.364107	0.821	0.93	4.88664e-15	Fibroblasts_KRT19	COL3A1
1.30577e-18	0.736536	1	0.998	4.88278e-14	Fibroblasts_KRT19	RPS23
1.44039e-18	0.83516	1	0.998	5.38618e-14	Fibroblasts_KRT19	RPS3A
1.69235e-18	0.366007	0.846	0.944	6.32837e-14	Fibroblasts_KRT19	FN1
3.04732e-18	0.809312	1	0.999	1.13951e-13	Fibroblasts_KRT19	RPS14
5.57724e-18	0.832021	1	0.998	2.08555e-13	Fibroblasts_KRT19	RPS4X
3.33808e-17	0.769908	1	1	1.24824e-12	Fibroblasts_KRT19	RPL11
6.37644e-17	0.592119	0.957	0.994	2.38441e-12	Fibroblasts_KRT19	LGALS1
6.53976e-17	0.280463	1	0.994	2.44548e-12	Fibroblasts_KRT19	S100A6
3.15563e-16	0.623658	1	0.995	1.18002e-11	Fibroblasts_KRT19	CD63
4.14159e-16	0.85921	1	0.999	1.54871e-11	Fibroblasts_KRT19	RPS2
9.86445e-16	0.788875	1	0.997	3.68871e-11	Fibroblasts_KRT19	RPL30
2.38081e-15	0.356083	0.769	0.933	8.90281e-11	Fibroblasts_KRT19	IGFBP7
2.4731e-15	0.453882	0.761	0.96	9.24792e-11	Fibroblasts_KRT19	TIMP1
1.65109e-14	0.622591	1	0.996	6.1741e-10	Fibroblasts_KRT19	FTL
3.27875e-14	0.813803	1	0.995	1.22606e-09	Fibroblasts_KRT19	RPL12
1.27111e-13	0.83471	1	0.996	4.75318e-09	Fibroblasts_KRT19	RPL6
1.12559e-12	0.73719	1	0.996	4.20903e-08	Fibroblasts_KRT19	RPL3
4.2956e-12	0.863894	0.863	0.618	1.6063e-07	Fibroblasts_KRT19	XBP1
5.45229e-12	0.649537	0.991	0.994	2.03883e-07	Fibroblasts_KRT19	RPL37
1.33657e-11	0.761494	0.991	0.998	4.99798e-07	Fibroblasts_KRT19	RPL15
1.45157e-11	0.627449	1	0.999	5.42801e-07	Fibroblasts_KRT19	PTMA
1.87629e-11	0.701452	1	0.999	7.01621e-07	Fibroblasts_KRT19	RPS15A
3.67559e-11	0.525694	1	0.998	1.37445e-06	Fibroblasts_KRT19	GAPDH
3.85175e-11	0.559145	0.949	0.978	1.44032e-06	Fibroblasts_KRT19	CST3
1.536e-09	0.701705	0.991	0.995	5.74371e-05	Fibroblasts_KRT19	RPL29
1.68353e-09	0.648616	1	0.998	6.29538e-05	Fibroblasts_KRT19	RPL34
3.25376e-09	0.457742	0.667	0.938	0.000121671	Fibroblasts_KRT19	MT-ND4L
5.73368e-09	0.755185	0.991	0.992	0.000214405	Fibroblasts_KRT19	RPL9
6.77023e-09	0.72629	1	0.996	0.000253166	Fibroblasts_KRT19	RPL7A
8.06858e-09	0.531826	1	0.996	0.000301717	Fibroblasts_KRT19	RPS27
1.553e-08	0.619583	1	0.994	0.000580729	Fibroblasts_KRT19	ACTG1
1.66851e-08	0.707856	1	0.994	0.000623924	Fibroblasts_KRT19	RPS8
1.79354e-08	0.459413	0.846	0.969	0.000670675	Fibroblasts_KRT19	HLA-B
2.74952e-08	0.430055	0.692	0.959	0.00102816	Fibroblasts_KRT19	RACK1
2.75618e-08	0.734983	1	0.997	0.00103064	Fibroblasts_KRT19	RPL21
3.51846e-08	0.593446	1	0.997	0.00131569	Fibroblasts_KRT19	RPL26
7.62805e-08	0.532775	0.932	0.969	0.00285243	Fibroblasts_KRT19	HLA-C
2.14022e-07	0.624081	1	0.999	0.00800314	Fibroblasts_KRT19	RPL28
2.33983e-07	0.827344	0.991	0.984	0.00874957	Fibroblasts_KRT19	RPL7
2.54243e-07	0.7285	1	0.99	0.00950717	Fibroblasts_KRT19	RPL10A
1.381e-06	0.730302	0.342	0.178	0.0516411	Fibroblasts_KRT19	CLDN4
2.02769e-06	1.10148	0.47	0.398	0.0758233	Fibroblasts_KRT19	AGR2
3.9504e-06	0.405039	0.667	0.96	0.147721	Fibroblasts_KRT19	HLA-A
4.29932e-06	0.601699	1	0.997	0.160769	Fibroblasts_KRT19	RPL37A
4.45836e-06	0.640455	1	0.999	0.166716	Fibroblasts_KRT19	RPS15
6.27232e-06	0.268669	0.402	0.859	0.234547	Fibroblasts_KRT19	SOD1
9.03981e-06	0.650905	1	0.996	0.338035	Fibroblasts_KRT19	RPS6
9.12475e-06	0.572847	1	1	0.341211	Fibroblasts_KRT19	RPL19
1.56933e-05	0.667057	0.983	0.992	0.586835	Fibroblasts_KRT19	RPL22
2.14659e-05	0.585284	1	0.994	0.802697	Fibroblasts_KRT19	RPLP2
2.78904e-05	0.291524	0.214	0.526	1	Fibroblasts_KRT19	CYB5A
4.41541e-05	0.576689	1	0.995	1	Fibroblasts_KRT19	RPL39
4.56293e-05	0.568161	0.957	0.99	1	Fibroblasts_KRT19	S100A11
5.32665e-05	0.686619	0.983	0.999	1	Fibroblasts_KRT19	NACA
5.78844e-05	0.26075	0.291	0.687	1	Fibroblasts_KRT19	S100A16
7.39671e-05	0.592789	1	0.997	1	Fibroblasts_KRT19	RPL35A
8.14832e-05	0.625763	1	0.999	1	Fibroblasts_KRT19	RPL8
9.92709e-05	0.713392	0.991	0.988	1	Fibroblasts_KRT19	RPS11
0.000109088	0.653635	0.991	0.994	1	Fibroblasts_KRT19	RPL24
0.000114018	0.302847	0.256	0.599	1	Fibroblasts_KRT19	RHOB
0.000175803	0.309559	0.462	0.831	1	Fibroblasts_KRT19	PABPC1
0.000215439	0.728249	1	0.987	1	Fibroblasts_KRT19	RPLP0
0.000220948	0.585342	1	0.999	1	Fibroblasts_KRT19	RPS19
0.00028165	0.873965	0.462	0.466	1	Fibroblasts_KRT19	SCGB2A2
0.000312479	0.615446	1	0.994	1	Fibroblasts_KRT19	RPS3
0.000319697	0.253055	0.974	0.976	1	Fibroblasts_KRT19	RPL27A
0.000373275	0.621868	0.983	0.994	1	Fibroblasts_KRT19	RPS13
0.000386593	0.615705	0.983	0.998	1	Fibroblasts_KRT19	RPL18
0.000650333	0.65289	1	0.997	1	Fibroblasts_KRT19	RPL35
0.00106839	0.733646	0.282	0.198	1	Fibroblasts_KRT19	CALML5
0.00130617	0.257718	0.701	0.932	1	Fibroblasts_KRT19	PKM
0.0018503	0.574835	0.991	0.994	1	Fibroblasts_KRT19	RPL14
0.00263281	0.557404	0.983	0.979	1	Fibroblasts_KRT19	HSP90AA1
0.00282243	0.622906	1	0.999	1	Fibroblasts_KRT19	RPS9
0.00459695	0.464154	0.137	0.07	1	Fibroblasts_KRT19	AGR3
0.00662597	0.603812	1	0.997	1	Fibroblasts_KRT19	RPL13A
0.00730164	0.2681	0.709	0.946	1	Fibroblasts_KRT19	PFDN5
1.75059e-43	0.714918	0.991	0.672	6.54616e-39	Fibroblasts_TAGLN	COMP
5.33381e-34	0.589311	0.928	0.608	1.99453e-29	Fibroblasts_TAGLN	PRELP
1.17558e-33	0.561413	0.61	0.208	4.39596e-29	Fibroblasts_TAGLN	CRLF1
8.21864e-29	0.47731	0.726	0.332	3.07328e-24	Fibroblasts_TAGLN	ANO1
1.25339e-28	0.55947	0.928	0.599	4.68693e-24	Fibroblasts_TAGLN	TAGLN
1.348e-26	0.486014	0.767	0.401	5.04072e-22	Fibroblasts_TAGLN	SUGCT
5.31273e-26	0.4722	0.744	0.37	1.98664e-21	Fibroblasts_TAGLN	LAMP5
8.22723e-26	0.489036	0.825	0.475	3.07649e-21	Fibroblasts_TAGLN	FMOD
2.96431e-25	0.38318	0.987	0.774	1.10847e-20	Fibroblasts_TAGLN	COL5A2
4.394e-25	0.444747	0.978	0.666	1.64309e-20	Fibroblasts_TAGLN	THBS2
1.4722e-24	0.479493	0.942	0.635	5.50515e-20	Fibroblasts_TAGLN	COL11A1
8.87237e-24	0.439891	0.91	0.612	3.31773e-19	Fibroblasts_TAGLN	COL4A2
1.01686e-23	0.399697	0.982	0.746	3.80245e-19	Fibroblasts_TAGLN	COL8A1
1.44659e-23	0.395391	0.857	0.499	5.40938e-19	Fibroblasts_TAGLN	ADAMTS2
1.49728e-23	0.304344	0.996	0.895	5.59895e-19	Fibroblasts_TAGLN	COL1A1
1.58512e-23	0.44588	0.91	0.619	5.9274e-19	Fibroblasts_TAGLN	COL4A1
4.54533e-23	0.383051	0.969	0.718	1.69968e-18	Fibroblasts_TAGLN	LTBP2
5.95855e-23	0.405737	0.951	0.672	2.22814e-18	Fibroblasts_TAGLN	ITGBL1
8.55054e-23	0.383095	0.511	0.188	3.19739e-18	Fibroblasts_TAGLN	CILP2
5.55154e-22	0.380639	0.96	0.737	2.07594e-17	Fibroblasts_TAGLN	COL5A1
7.11654e-22	0.371689	0.888	0.595	2.66116e-17	Fibroblasts_TAGLN	HSPG2
1.42501e-21	0.370817	0.511	0.2	5.32869e-17	Fibroblasts_TAGLN	NTM
2.60379e-21	0.437096	0.7	0.374	9.73661e-17	Fibroblasts_TAGLN	LOXL1
1.51413e-20	0.417053	0.87	0.564	5.66194e-16	Fibroblasts_TAGLN	CTHRC1
1.86303e-20	0.358244	0.933	0.614	6.96663e-16	Fibroblasts_TAGLN	NOTCH3
2.79293e-19	0.264236	0.996	0.869	1.04439e-14	Fibroblasts_TAGLN	BGN
3.00233e-19	0.361044	0.677	0.351	1.12269e-14	Fibroblasts_TAGLN	SRPX2
3.9177e-19	0.410385	0.587	0.293	1.46498e-14	Fibroblasts_TAGLN	EDIL3
4.62377e-19	0.436071	0.646	0.352	1.72901e-14	Fibroblasts_TAGLN	LOXL2
6.27692e-19	0.332965	0.951	0.736	2.34719e-14	Fibroblasts_TAGLN	MYL9
8.64494e-19	0.254373	1	0.896	3.23269e-14	Fibroblasts_TAGLN	COL3A1
9.79247e-19	0.392612	0.821	0.505	3.66179e-14	Fibroblasts_TAGLN	AQP1
1.07333e-18	0.268828	0.996	0.848	4.01361e-14	Fibroblasts_TAGLN	CALD1
1.41332e-18	0.371897	0.749	0.446	5.28496e-14	Fibroblasts_TAGLN	ITGA11
1.59566e-18	0.327597	0.969	0.785	5.96681e-14	Fibroblasts_TAGLN	TPM1
1.13412e-17	0.381794	0.946	0.738	4.24092e-13	Fibroblasts_TAGLN	COL12A1
1.20476e-17	0.36973	0.901	0.635	4.50509e-13	Fibroblasts_TAGLN	INHBA
1.81721e-17	0.526769	0.413	0.149	6.79528e-13	Fibroblasts_TAGLN	CST1
1.94905e-17	0.333394	0.991	0.766	7.28829e-13	Fibroblasts_TAGLN	FBN1
3.15541e-17	0.371451	0.942	0.727	1.17993e-12	Fibroblasts_TAGLN	VCAN
1.01608e-16	0.340356	0.794	0.485	3.79953e-12	Fibroblasts_TAGLN	LMCD1
1.55447e-16	0.272884	0.919	0.687	5.81279e-12	Fibroblasts_TAGLN	MYH9
1.56267e-16	0.282012	0.395	0.146	5.84345e-12	Fibroblasts_TAGLN	MICAL2
2.11041e-16	0.332999	0.39	0.148	7.89167e-12	Fibroblasts_TAGLN	ELN
2.2678e-16	0.309629	0.901	0.617	8.4802e-12	Fibroblasts_TAGLN	FAP
2.62865e-16	0.435304	0.857	0.54	9.82959e-12	Fibroblasts_TAGLN	COL10A1
3.31867e-16	0.311244	0.946	0.689	1.24098e-11	Fibroblasts_TAGLN	RCN3
4.1e-16	0.359215	0.874	0.557	1.53316e-11	Fibroblasts_TAGLN	LRRC15
4.35717e-16	0.337651	0.982	0.774	1.62932e-11	Fibroblasts_TAGLN	PRSS23
5.64141e-16	0.293863	0.843	0.56	2.10955e-11	Fibroblasts_TAGLN	ACTN4
1.59965e-15	0.322607	0.587	0.296	5.98174e-11	Fibroblasts_TAGLN	COL8A2
2.85236e-15	0.327367	0.991	0.766	1.06661e-10	Fibroblasts_TAGLN	IGFBP4
3.00608e-15	0.320553	0.686	0.399	1.12409e-10	Fibroblasts_TAGLN	FAM198B
3.56216e-15	0.285251	0.879	0.645	1.33204e-10	Fibroblasts_TAGLN	FKBP10
3.95631e-15	0.312404	0.758	0.446	1.47942e-10	Fibroblasts_TAGLN	ITGA1
5.72592e-15	0.313189	0.852	0.548	2.14115e-10	Fibroblasts_TAGLN	TMEM119
5.73373e-15	0.290464	0.982	0.824	2.14407e-10	Fibroblasts_TAGLN	AEBP1
6.36865e-15	0.286691	0.664	0.367	2.38149e-10	Fibroblasts_TAGLN	KDELR3
6.60912e-15	0.285963	0.399	0.161	2.47142e-10	Fibroblasts_TAGLN	HMCN1
8.10925e-15	0.308647	0.345	0.128	3.03237e-10	Fibroblasts_TAGLN	TSPAN2
2.16851e-14	0.284568	0.61	0.325	8.10894e-10	Fibroblasts_TAGLN	CX3CL1
2.25337e-14	0.279959	0.883	0.612	8.42627e-10	Fibroblasts_TAGLN	COPZ2
3.02862e-14	0.279891	0.874	0.588	1.13252e-09	Fibroblasts_TAGLN	HES4
4.93749e-14	0.283095	0.951	0.74	1.84633e-09	Fibroblasts_TAGLN	MFGE8
5.07034e-14	0.334184	0.224	0.059	1.896e-09	Fibroblasts_TAGLN	SFRP2
5.34892e-14	0.260265	0.448	0.198	2.00017e-09	Fibroblasts_TAGLN	PPP1R13L
6.22355e-14	0.415488	0.825	0.583	2.32724e-09	Fibroblasts_TAGLN	POSTN
1.12701e-13	0.312341	0.874	0.642	4.21434e-09	Fibroblasts_TAGLN	MXRA5
1.14944e-13	0.274001	0.807	0.535	4.2982e-09	Fibroblasts_TAGLN	GPX8
1.21834e-13	0.256821	0.933	0.718	4.55588e-09	Fibroblasts_TAGLN	ITGB5
1.9175e-13	0.298836	0.668	0.38	7.17031e-09	Fibroblasts_TAGLN	COL5A3
2.16042e-13	0.267886	0.462	0.217	8.07868e-09	Fibroblasts_TAGLN	B4GALT2
2.66645e-13	0.31511	0.906	0.706	9.97091e-09	Fibroblasts_TAGLN	COL18A1
3.01733e-13	0.266827	0.955	0.736	1.1283e-08	Fibroblasts_TAGLN	SERPINH1
4.14152e-13	0.25828	0.857	0.632	1.54868e-08	Fibroblasts_TAGLN	SLC44A1
7.11199e-13	0.255252	0.928	0.711	2.65946e-08	Fibroblasts_TAGLN	FLNA
8.20247e-13	0.285101	0.969	0.787	3.06723e-08	Fibroblasts_TAGLN	COL6A3
8.96733e-13	0.272944	0.969	0.739	3.35324e-08	Fibroblasts_TAGLN	FSTL1
9.15568e-13	0.288631	0.466	0.227	3.42367e-08	Fibroblasts_TAGLN	F2R
9.88442e-13	0.253392	0.691	0.424	3.69618e-08	Fibroblasts_TAGLN	PDLIM7
1.0269e-12	0.328383	0.753	0.492	3.83999e-08	Fibroblasts_TAGLN	FNDC1
1.15645e-12	0.257317	0.937	0.741	4.32443e-08	Fibroblasts_TAGLN	CTNNB1
1.3761e-12	0.272921	0.964	0.733	5.14578e-08	Fibroblasts_TAGLN	PRRX1
1.48719e-12	0.258589	0.753	0.479	5.56119e-08	Fibroblasts_TAGLN	DKK3
1.91483e-12	0.25324	0.735	0.471	7.1603e-08	Fibroblasts_TAGLN	P4HA2
2.18574e-12	0.345522	0.493	0.267	8.17335e-08	Fibroblasts_TAGLN	PAPPA
2.22827e-12	0.260988	0.673	0.417	8.33238e-08	Fibroblasts_TAGLN	MYO1D
3.55611e-12	0.254056	0.794	0.518	1.32977e-07	Fibroblasts_TAGLN	LMO7
3.72994e-12	0.267306	0.749	0.503	1.39477e-07	Fibroblasts_TAGLN	CERCAM
3.87975e-12	0.26402	0.969	0.766	1.45079e-07	Fibroblasts_TAGLN	LRP1
5.07295e-12	0.260219	0.673	0.406	1.89698e-07	Fibroblasts_TAGLN	KIAA1217
5.20154e-12	0.42701	0.552	0.331	1.94506e-07	Fibroblasts_TAGLN	ACTA2
5.2922e-12	0.252393	0.87	0.659	1.97897e-07	Fibroblasts_TAGLN	ACTN1
7.51221e-12	0.271845	0.946	0.711	2.80912e-07	Fibroblasts_TAGLN	NBL1
3.05551e-11	0.325282	0.843	0.599	1.14258e-06	Fibroblasts_TAGLN	CTGF
4.18044e-11	0.26159	0.668	0.419	1.56323e-06	Fibroblasts_TAGLN	TRIB2
4.45441e-11	0.335555	0.538	0.32	1.66568e-06	Fibroblasts_TAGLN	PPP1R14A
4.94517e-11	0.250198	0.587	0.338	1.8492e-06	Fibroblasts_TAGLN	HAPLN3
5.07397e-11	0.259174	0.448	0.227	1.89736e-06	Fibroblasts_TAGLN	ADAMTS6
1.20707e-10	0.262353	0.843	0.63	4.5137e-06	Fibroblasts_TAGLN	LTBP1
1.21326e-10	0.28684	0.413	0.208	4.53685e-06	Fibroblasts_TAGLN	RBP4
1.6129e-10	0.340356	0.731	0.492	6.03129e-06	Fibroblasts_TAGLN	IGFBP3
2.6167e-10	0.278833	0.381	0.185	9.78488e-06	Fibroblasts_TAGLN	COL26A1
4.09941e-10	0.258075	0.758	0.512	1.53293e-05	Fibroblasts_TAGLN	MT1E
5.56777e-10	0.252375	0.825	0.638	2.08201e-05	Fibroblasts_TAGLN	CRIP1
7.22731e-10	0.259701	0.677	0.473	2.70258e-05	Fibroblasts_TAGLN	IVNS1ABP
8.97275e-10	0.265488	0.574	0.347	3.35527e-05	Fibroblasts_TAGLN	ISLR
7.96038e-09	0.299367	0.874	0.586	0.00029767	Fibroblasts_TAGLN	ASPN
1.87209e-24	0.398725	0.324	0.048	7.00048e-20	Fibroblasts_OLFML2B	ADAMTS9
9.7443e-20	0.578618	0.647	0.238	3.64378e-15	Fibroblasts_OLFML2B	PTX3
8.36627e-19	0.540551	0.529	0.167	3.12848e-14	Fibroblasts_OLFML2B	ALPL
1.05527e-18	0.448757	0.588	0.201	3.94609e-14	Fibroblasts_OLFML2B	GPM6B
1.32681e-16	0.488585	0.951	0.61	4.96146e-12	Fibroblasts_OLFML2B	OLFML2B
2.40567e-15	0.457835	0.569	0.22	8.99575e-11	Fibroblasts_OLFML2B	APCDD1
1.56223e-14	0.507047	0.686	0.355	5.84182e-10	Fibroblasts_OLFML2B	PTN
8.73312e-14	0.434626	0.931	0.622	3.26566e-09	Fibroblasts_OLFML2B	SELENOP
1.25762e-13	0.358406	0.471	0.165	4.70275e-09	Fibroblasts_OLFML2B	CD248
1.34287e-12	0.391188	0.853	0.522	5.02151e-08	Fibroblasts_OLFML2B	MDK
1.54101e-11	0.371083	0.843	0.551	5.76246e-07	Fibroblasts_OLFML2B	COL16A1
5.69905e-11	0.389473	0.696	0.407	2.1311e-06	Fibroblasts_OLFML2B	KCTD12
9.90907e-11	0.321705	0.431	0.168	3.7054e-06	Fibroblasts_OLFML2B	MPP6
1.00214e-10	0.26404	0.304	0.092	3.74739e-06	Fibroblasts_OLFML2B	TSPAN18
1.08335e-10	0.330387	0.49	0.208	4.05108e-06	Fibroblasts_OLFML2B	SEPT4
1.11599e-10	0.520613	0.814	0.544	4.17312e-06	Fibroblasts_OLFML2B	APOE
1.19778e-10	0.313434	0.343	0.113	4.47897e-06	Fibroblasts_OLFML2B	MCAM
1.20527e-10	0.280081	0.373	0.13	4.50699e-06	Fibroblasts_OLFML2B	TMEM108
3.26727e-10	0.324743	0.951	0.727	1.22176e-05	Fibroblasts_OLFML2B	MRC2
7.71245e-10	0.378735	0.686	0.372	2.884e-05	Fibroblasts_OLFML2B	LEPR
8.14115e-10	0.333973	0.941	0.75	3.0443e-05	Fibroblasts_OLFML2B	UACA
8.28553e-10	0.465828	0.863	0.61	3.09829e-05	Fibroblasts_OLFML2B	POSTN
1.01019e-09	0.344056	0.882	0.583	3.7775e-05	Fibroblasts_OLFML2B	TMEM119
1.31442e-09	0.370123	0.735	0.428	4.91514e-05	Fibroblasts_OLFML2B	VCAM1
1.56035e-09	0.359986	0.784	0.471	5.83477e-05	Fibroblasts_OLFML2B	RGS3
1.79382e-09	0.302751	0.52	0.239	6.70782e-05	Fibroblasts_OLFML2B	HLA-DMA
1.86588e-09	0.263738	1	0.846	6.97726e-05	Fibroblasts_OLFML2B	MARCKS
1.98047e-09	0.264345	0.48	0.21	7.40578e-05	Fibroblasts_OLFML2B	COTL1
2.26082e-09	0.300019	0.755	0.437	8.45412e-05	Fibroblasts_OLFML2B	GMFG
2.56156e-09	0.271483	0.931	0.738	9.57869e-05	Fibroblasts_OLFML2B	LGALS3BP
6.10931e-09	0.298905	0.824	0.498	0.000228451	Fibroblasts_OLFML2B	CHN1
7.38349e-09	0.377208	0.912	0.642	0.000276098	Fibroblasts_OLFML2B	TAGLN
8.32706e-09	0.312772	0.873	0.668	0.000311382	Fibroblasts_OLFML2B	EMILIN1
1.49707e-08	0.332558	0.333	0.127	0.000559814	Fibroblasts_OLFML2B	GRP
1.59289e-08	0.292242	0.676	0.386	0.000595645	Fibroblasts_OLFML2B	FLNB
1.68242e-08	0.288586	0.676	0.389	0.000629125	Fibroblasts_OLFML2B	PIK3R1
1.73227e-08	0.316991	0.833	0.572	0.000647766	Fibroblasts_OLFML2B	RUNX2
1.83355e-08	0.343519	0.676	0.407	0.000685636	Fibroblasts_OLFML2B	DLX5
1.95463e-08	0.274229	0.745	0.455	0.000730915	Fibroblasts_OLFML2B	CNN2
2.11904e-08	0.307838	0.843	0.543	0.000792392	Fibroblasts_OLFML2B	A2M
2.19516e-08	0.291364	0.833	0.555	0.000820858	Fibroblasts_OLFML2B	SLIT2
2.45322e-08	0.272012	0.951	0.721	0.000917357	Fibroblasts_OLFML2B	CAVIN1
3.36352e-08	0.287745	0.48	0.232	0.00125775	Fibroblasts_OLFML2B	VASN
3.54611e-08	0.250481	0.284	0.101	0.00132603	Fibroblasts_OLFML2B	FRAS1
3.63851e-08	0.279687	0.814	0.528	0.00136059	Fibroblasts_OLFML2B	LAMB1
4.35796e-08	0.264585	0.637	0.357	0.00162962	Fibroblasts_OLFML2B	P3H1
5.52035e-08	0.255334	0.735	0.452	0.00206428	Fibroblasts_OLFML2B	CKAP4
5.61907e-08	0.271462	0.755	0.481	0.00210119	Fibroblasts_OLFML2B	VCL
6.70713e-08	0.343309	0.804	0.612	0.00250806	Fibroblasts_OLFML2B	TNC
6.75149e-08	0.272795	0.98	0.774	0.00252465	Fibroblasts_OLFML2B	CDH11
7.20145e-08	0.27145	0.539	0.279	0.00269291	Fibroblasts_OLFML2B	ITSN1
7.76489e-08	0.290722	0.431	0.2	0.0029036	Fibroblasts_OLFML2B	LIFR
1.12484e-07	0.336824	0.824	0.55	0.00420623	Fibroblasts_OLFML2B	SOCS3
1.41202e-07	0.257409	0.598	0.333	0.00528009	Fibroblasts_OLFML2B	CAPRIN1
1.58304e-07	0.259904	0.422	0.197	0.00591961	Fibroblasts_OLFML2B	ARMCX2
1.79678e-07	0.292242	0.735	0.473	0.00671889	Fibroblasts_OLFML2B	ZFHX4
2.43982e-07	0.250226	0.971	0.75	0.00912345	Fibroblasts_OLFML2B	TUBA1A
2.66199e-07	0.286702	0.833	0.604	0.00995423	Fibroblasts_OLFML2B	ZEB2
3.35214e-07	0.292242	0.686	0.414	0.012535	Fibroblasts_OLFML2B	COL5A3
5.48444e-07	0.261098	0.961	0.712	0.0205085	Fibroblasts_OLFML2B	ZFP36L2
5.52316e-07	0.250148	0.402	0.19	0.0206533	Fibroblasts_OLFML2B	APOL6
6.05775e-07	0.252935	0.971	0.768	0.0226524	Fibroblasts_OLFML2B	FSTL1
6.67161e-07	0.26494	0.784	0.554	0.0249478	Fibroblasts_OLFML2B	LMO7
7.21013e-07	0.2766	0.343	0.154	0.0269615	Fibroblasts_OLFML2B	HGF
9.02509e-07	0.250622	0.941	0.696	0.0337484	Fibroblasts_OLFML2B	OLFML3
9.1461e-07	0.272433	0.529	0.291	0.0342009	Fibroblasts_OLFML2B	PAPPA
1.00538e-06	0.346166	0.941	0.615	0.0375952	Fibroblasts_OLFML2B	ASPN
1.39183e-06	0.296079	0.529	0.31	0.052046	Fibroblasts_OLFML2B	SNAI2
1.48508e-06	0.291003	0.833	0.637	0.055533	Fibroblasts_OLFML2B	CYP1B1
1.54041e-06	0.25889	0.5	0.273	0.057602	Fibroblasts_OLFML2B	ENPEP
1.82201e-06	0.298109	0.922	0.676	0.0681321	Fibroblasts_OLFML2B	COL11A1
2.64868e-06	0.271923	0.863	0.673	0.0990446	Fibroblasts_OLFML2B	MXRA5
5.57669e-06	0.284125	0.735	0.521	0.208535	Fibroblasts_OLFML2B	IRF1
8.99869e-06	0.29248	0.588	0.354	0.336497	Fibroblasts_OLFML2B	ACTA2
1.28068e-05	0.253028	0.696	0.462	0.478897	Fibroblasts_OLFML2B	PDGFA
1.45095e-05	0.256102	0.971	0.751	0.542567	Fibroblasts_OLFML2B	VCAN
1.90632e-05	0.264202	0.902	0.642	0.71285	Fibroblasts_OLFML2B	OMD
2.22982e-05	0.258675	0.363	0.194	0.833817	Fibroblasts_OLFML2B	MYH10
1.63807e-228	1.4231	1	0.001	6.12541e-224	Fibroblasts_MGST1	CILP
7.40666e-203	1.50696	0.868	0	2.76965e-198	Fibroblasts_MGST1	ADH1B
7.07794e-188	1.50082	0.974	0.008	2.64673e-183	Fibroblasts_MGST1	TNXB
1.86592e-187	1.6689	1	0.01	6.97742e-183	Fibroblasts_MGST1	MFAP4
9.88516e-181	1.25289	0.868	0.004	3.69646e-176	Fibroblasts_MGST1	ALDH1A1
7.96423e-176	1.87276	1	0.013	2.97814e-171	Fibroblasts_MGST1	C3
3.22437e-171	1.06564	0.868	0.006	1.20572e-166	Fibroblasts_MGST1	LRRN4CL
8.15677e-171	1.11458	0.921	0.009	3.05014e-166	Fibroblasts_MGST1	NOVA1
3.41823e-167	1.16858	0.868	0.007	1.27821e-162	Fibroblasts_MGST1	LAMA2
1.46128e-165	0.8592	0.737	0.001	5.4643e-161	Fibroblasts_MGST1	F10
4.91651e-153	0.881356	0.658	0	1.83848e-148	Fibroblasts_MGST1	HMCN2
6.45715e-153	1.0105	0.789	0.006	2.41459e-148	Fibroblasts_MGST1	ABCA9
7.25252e-147	0.752072	0.632	0	2.71201e-142	Fibroblasts_MGST1	BCHE
7.46964e-147	0.941897	0.632	0	2.7932e-142	Fibroblasts_MGST1	SCN7A
2.91415e-145	1.68067	0.737	0.005	1.08972e-140	Fibroblasts_MGST1	PLA2G2A
1.29598e-143	1.16304	0.816	0.01	4.84618e-139	Fibroblasts_MGST1	ITIH5
1.15541e-142	1.26217	0.947	0.019	4.32055e-138	Fibroblasts_MGST1	ITM2A
1.01237e-134	1.41117	0.974	0.025	3.78566e-130	Fibroblasts_MGST1	ABCA8
1.51681e-134	0.658963	0.579	0	5.67195e-130	Fibroblasts_MGST1	CHRDL1
1.53341e-134	0.706269	0.579	0	5.73403e-130	Fibroblasts_MGST1	CAPN6
2.10709e-132	1.54405	0.974	0.026	7.87927e-128	Fibroblasts_MGST1	MEG3
2.20829e-129	1.13603	0.684	0.006	8.25768e-125	Fibroblasts_MGST1	CLEC14A
4.32451e-129	0.749279	0.605	0.002	1.61711e-124	Fibroblasts_MGST1	CD34
3.1703e-125	1.18244	0.842	0.017	1.1855e-120	Fibroblasts_MGST1	ANGPTL1
2.93381e-122	0.68281	0.526	0	1.09707e-117	Fibroblasts_MGST1	ALDH1A2
6.24898e-122	0.886523	0.737	0.011	2.33674e-117	Fibroblasts_MGST1	AGTR1
3.91783e-116	0.752072	0.5	0	1.46503e-111	Fibroblasts_MGST1	MYOC
9.60574e-115	0.722379	0.605	0.005	3.59197e-110	Fibroblasts_MGST1	RGMA
3.85628e-110	1.23974	0.711	0.013	1.44202e-105	Fibroblasts_MGST1	THBS4
3.91874e-110	0.633318	0.5	0.001	1.46537e-105	Fibroblasts_MGST1	IL33
2.58753e-107	0.81734	0.737	0.016	9.67579e-103	Fibroblasts_MGST1	MAN1C1
7.641e-107	0.74232	0.605	0.007	2.85728e-102	Fibroblasts_MGST1	ABCA10
1.76994e-104	0.626352	0.5	0.002	6.61852e-100	Fibroblasts_MGST1	PCSK6
6.37176e-104	0.634716	0.447	0	2.38266e-99	Fibroblasts_MGST1	ADH1C
1.04917e-101	0.814589	0.684	0.014	3.92328e-97	Fibroblasts_MGST1	ADAMTSL3
7.83179e-98	0.559427	0.421	0	2.92862e-93	Fibroblasts_MGST1	FAM162B
3.53852e-92	0.97724	0.895	0.04	1.32319e-87	Fibroblasts_MGST1	SVEP1
6.04429e-92	0.704872	0.421	0.001	2.2602e-87	Fibroblasts_MGST1	SLC1A7
1.9586e-91	1.42016	0.974	0.056	7.324e-87	Fibroblasts_MGST1	PLPP3
8.30466e-84	1.19176	0.789	0.035	3.10544e-79	Fibroblasts_MGST1	SFRP1
6.62322e-83	0.725753	0.605	0.015	2.47669e-78	Fibroblasts_MGST1	FILIP1
9.22262e-80	0.451115	0.368	0.001	3.44871e-75	Fibroblasts_MGST1	C16orf89
4.72786e-77	0.79548	0.711	0.028	1.76794e-72	Fibroblasts_MGST1	EBF2
4.08537e-76	1.19132	0.921	0.061	1.52768e-71	Fibroblasts_MGST1	STEAP4
6.04147e-76	0.529244	0.395	0.003	2.25915e-71	Fibroblasts_MGST1	GRK5
1.4543e-75	1.57065	1	0.081	5.4382e-71	Fibroblasts_MGST1	EFEMP1
2.66597e-74	0.739545	0.368	0.002	9.96915e-70	Fibroblasts_MGST1	PI16
1.1631e-73	0.499987	0.421	0.005	4.3493e-69	Fibroblasts_MGST1	RIPOR3
2.4766e-72	0.883965	0.842	0.049	9.26101e-68	Fibroblasts_MGST1	TGFBR3
1.07789e-67	0.47024	0.395	0.005	4.03067e-63	Fibroblasts_MGST1	PTGS1
1.55527e-67	0.584963	0.289	0	5.81578e-63	Fibroblasts_MGST1	CCL11
1.19052e-66	0.568284	0.474	0.011	4.45185e-62	Fibroblasts_MGST1	TRIL
8.66895e-66	1.32653	0.974	0.094	3.24167e-61	Fibroblasts_MGST1	FBLN5
4.70256e-64	0.877645	0.711	0.039	1.75847e-59	Fibroblasts_MGST1	RDH10
6.27495e-62	0.682482	0.658	0.032	2.34645e-57	Fibroblasts_MGST1	CELF2
1.34324e-61	0.390348	0.289	0.001	5.02291e-57	Fibroblasts_MGST1	FREM1
1.66072e-61	0.366782	0.263	0	6.21008e-57	Fibroblasts_MGST1	CNTFR
1.66313e-61	0.50696	0.263	0	6.21911e-57	Fibroblasts_MGST1	HP
1.66325e-61	0.452512	0.263	0	6.21957e-57	Fibroblasts_MGST1	VEGFD
6.89209e-61	0.648277	0.421	0.009	2.57723e-56	Fibroblasts_MGST1	GPC3
1.39464e-59	1.03314	0.895	0.078	5.2151e-55	Fibroblasts_MGST1	SPON2
5.00102e-56	0.759327	0.763	0.055	1.87008e-51	Fibroblasts_MGST1	BMPER
8.98515e-56	0.505563	0.263	0.001	3.35991e-51	Fibroblasts_MGST1	C7
9.86488e-56	0.335638	0.263	0.001	3.68887e-51	Fibroblasts_MGST1	EDNRB
1.74324e-55	0.395929	0.237	0	6.51867e-51	Fibroblasts_MGST1	CPB1
8.93375e-55	0.806447	0.737	0.053	3.34069e-50	Fibroblasts_MGST1	OAF
1.72202e-54	0.589235	0.421	0.012	6.43934e-50	Fibroblasts_MGST1	HSD11B1
9.94399e-54	0.843918	0.342	0.006	3.71846e-49	Fibroblasts_MGST1	CHI3L1
5.45649e-53	0.602916	0.474	0.017	2.0404e-48	Fibroblasts_MGST1	CLEC3B
1.35985e-52	0.42031	0.289	0.003	5.08503e-48	Fibroblasts_MGST1	ARHGAP20
1.35985e-52	0.391741	0.289	0.003	5.08503e-48	Fibroblasts_MGST1	RET
4.47872e-52	0.94057	0.895	0.092	1.67477e-47	Fibroblasts_MGST1	PODN
1.56753e-51	1.08921	0.947	0.103	5.86161e-47	Fibroblasts_MGST1	MGST1
2.48492e-51	0.892286	0.816	0.075	9.2921e-47	Fibroblasts_MGST1	SPRY2
2.52685e-51	1.17344	0.974	0.13	9.44889e-47	Fibroblasts_MGST1	NFIB
6.41348e-51	0.334242	0.263	0.002	2.39826e-46	Fibroblasts_MGST1	LVRN
8.91345e-51	0.838327	0.816	0.074	3.3331e-46	Fibroblasts_MGST1	SCARA5
9.10121e-50	0.305264	0.237	0.001	3.40331e-45	Fibroblasts_MGST1	CYP4B1
1.78875e-49	0.275634	0.211	0	6.68886e-45	Fibroblasts_MGST1	PENK
2.02706e-49	0.659504	0.526	0.026	7.57999e-45	Fibroblasts_MGST1	OSR2
1.41857e-48	1.19636	0.711	0.061	5.3046e-44	Fibroblasts_MGST1	MFAP5
4.41005e-48	0.383402	0.316	0.006	1.64909e-43	Fibroblasts_MGST1	FNDC5
4.85925e-48	2.05058	1	0.179	1.81707e-43	Fibroblasts_MGST1	CFD
1.26423e-47	0.873177	0.763	0.071	4.72746e-43	Fibroblasts_MGST1	ALDH1A3
4.35822e-45	0.303868	0.237	0.002	1.62971e-40	Fibroblasts_MGST1	PQLC2L
8.40875e-45	0.816881	0.737	0.069	3.14437e-40	Fibroblasts_MGST1	GFRA1
5.01246e-44	1.49471	1	0.193	1.87436e-39	Fibroblasts_MGST1	GPX3
9.67717e-44	0.331454	0.211	0.001	3.61868e-39	Fibroblasts_MGST1	PREX2
1.39233e-43	0.456421	0.342	0.01	5.20647e-39	Fibroblasts_MGST1	CEBPA
1.49708e-43	0.564643	0.474	0.024	5.59819e-39	Fibroblasts_MGST1	MBP
2.19038e-43	0.361201	0.263	0.004	8.19072e-39	Fibroblasts_MGST1	ADAM33
2.05926e-42	0.666438	0.579	0.042	7.70038e-38	Fibroblasts_MGST1	BMP5
1.04962e-41	0.76065	0.632	0.053	3.92496e-37	Fibroblasts_MGST1	ABCA6
2.87115e-41	0.667777	0.579	0.044	1.07364e-36	Fibroblasts_MGST1	PRICKLE1
3.47188e-41	0.302474	0.237	0.003	1.29828e-36	Fibroblasts_MGST1	PKDCC
4.15253e-41	0.298298	0.237	0.003	1.5528e-36	Fibroblasts_MGST1	CLIC2
4.15253e-41	0.298298	0.237	0.003	1.5528e-36	Fibroblasts_MGST1	EPB41L3
5.34742e-41	0.42208	0.368	0.014	1.99961e-36	Fibroblasts_MGST1	RAMP2
7.81901e-41	0.377869	0.316	0.009	2.92384e-36	Fibroblasts_MGST1	GALNT16
4.3199e-40	0.794106	0.711	0.074	1.61538e-35	Fibroblasts_MGST1	FAM129A
2.59257e-39	0.809741	0.789	0.095	9.69467e-35	Fibroblasts_MGST1	PTGFR
5.93826e-39	0.47516	0.421	0.021	2.22055e-34	Fibroblasts_MGST1	CFI
6.24412e-39	0.382016	0.316	0.01	2.33493e-34	Fibroblasts_MGST1	SIRPA
1.01631e-37	0.358419	0.263	0.006	3.80039e-33	Fibroblasts_MGST1	MEG8
3.62547e-37	1.83627	0.974	0.234	1.35571e-32	Fibroblasts_MGST1	APOD
7.67397e-37	0.490734	0.421	0.023	2.86961e-32	Fibroblasts_MGST1	FGL2
1.50552e-36	0.530101	0.447	0.027	5.62974e-32	Fibroblasts_MGST1	PID1
1.71996e-36	0.64068	0.526	0.041	6.43161e-32	Fibroblasts_MGST1	TNNT3
2.77009e-36	0.563289	0.474	0.032	1.03585e-31	Fibroblasts_MGST1	AC245595.1
3.15651e-36	0.539552	0.474	0.032	1.18034e-31	Fibroblasts_MGST1	ANGPT1
3.82852e-36	0.383402	0.289	0.009	1.43164e-31	Fibroblasts_MGST1	PDE1A
1.03489e-35	0.775705	0.816	0.112	3.86988e-31	Fibroblasts_MGST1	NEGR1
1.27852e-35	0.993913	0.895	0.158	4.78088e-31	Fibroblasts_MGST1	BOC
1.33882e-35	0.271447	0.211	0.003	5.00639e-31	Fibroblasts_MGST1	KLHL13
1.33882e-35	0.271447	0.211	0.003	5.00639e-31	Fibroblasts_MGST1	OLFM4
4.03669e-35	0.388601	0.342	0.015	1.50948e-30	Fibroblasts_MGST1	PALMD
4.58946e-35	1.56518	0.947	0.208	1.71618e-30	Fibroblasts_MGST1	PTGDS
5.67959e-35	0.549818	0.5	0.038	2.12383e-30	Fibroblasts_MGST1	BIN1
5.75415e-35	1.1218	0.868	0.16	2.15171e-30	Fibroblasts_MGST1	TMEM176A
1.05713e-33	1.09205	0.842	0.146	3.95303e-29	Fibroblasts_MGST1	IGF1
3.1339e-33	0.639735	0.658	0.074	1.17189e-28	Fibroblasts_MGST1	C1orf21
1.58091e-32	0.347342	0.289	0.011	5.91164e-28	Fibroblasts_MGST1	AMPH
2.51825e-32	0.509959	0.421	0.028	9.41676e-28	Fibroblasts_MGST1	CP
4.73634e-32	0.713045	0.605	0.067	1.77111e-27	Fibroblasts_MGST1	ACVRL1
4.34416e-31	0.724619	0.684	0.089	1.62445e-26	Fibroblasts_MGST1	TSHZ2
2.80571e-30	1.26042	0.868	0.212	1.04917e-25	Fibroblasts_MGST1	COL15A1
7.96783e-30	0.54313	0.5	0.047	2.97949e-25	Fibroblasts_MGST1	STEAP2
1.29649e-29	0.514041	0.5	0.047	4.8481e-25	Fibroblasts_MGST1	DIO3OS
1.4547e-29	0.792844	0.737	0.114	5.43972e-25	Fibroblasts_MGST1	EGFR
2.30528e-29	0.737237	0.789	0.129	8.62038e-25	Fibroblasts_MGST1	VIT
4.99472e-29	0.597196	0.658	0.085	1.86772e-24	Fibroblasts_MGST1	CMTM8
1.31782e-28	0.610279	0.579	0.068	4.92787e-24	Fibroblasts_MGST1	PDE5A
1.4401e-28	0.394066	0.342	0.02	5.3851e-24	Fibroblasts_MGST1	INMT
1.85789e-28	0.585513	0.553	0.061	6.94741e-24	Fibroblasts_MGST1	LRIG1
2.7794e-28	0.340463	0.289	0.014	1.03933e-23	Fibroblasts_MGST1	PAG1
2.96301e-28	0.753031	0.632	0.086	1.10799e-23	Fibroblasts_MGST1	BMP4
4.57106e-28	0.684472	0.763	0.124	1.7093e-23	Fibroblasts_MGST1	DCLK1
6.09391e-28	0.884465	0.895	0.168	2.27876e-23	Fibroblasts_MGST1	ADM
1.19294e-27	0.296909	0.211	0.006	4.46089e-23	Fibroblasts_MGST1	CLSTN2
1.30075e-27	0.389965	0.342	0.021	4.86403e-23	Fibroblasts_MGST1	ANOS1
1.30075e-27	0.389965	0.342	0.021	4.86403e-23	Fibroblasts_MGST1	GSC
1.5633e-27	0.997984	0.921	0.24	5.84582e-23	Fibroblasts_MGST1	MME
2.01871e-27	1.0122	0.921	0.238	7.54876e-23	Fibroblasts_MGST1	TMEM176B
6.09971e-27	0.724619	0.658	0.099	2.28093e-22	Fibroblasts_MGST1	KAZALD1
7.81667e-27	0.320356	0.263	0.012	2.92297e-22	Fibroblasts_MGST1	SCUBE2
2.89107e-26	0.932358	0.895	0.219	1.08109e-21	Fibroblasts_MGST1	AKAP12
4.41516e-26	1.20952	1	0.526	1.651e-21	Fibroblasts_MGST1	SMOC2
5.92445e-26	0.418418	0.395	0.032	2.21539e-21	Fibroblasts_MGST1	MGLL
6.21412e-26	0.508727	0.474	0.048	2.32371e-21	Fibroblasts_MGST1	OGFRL1
6.25464e-26	0.895824	1	0.285	2.33886e-21	Fibroblasts_MGST1	NFIA
9.17092e-26	0.296909	0.211	0.007	3.42937e-21	Fibroblasts_MGST1	SLC8A1
1.22454e-25	0.348722	0.263	0.013	4.57905e-21	Fibroblasts_MGST1	FGF18
1.27608e-25	1.09479	1	0.413	4.77177e-21	Fibroblasts_MGST1	FBLN2
4.72779e-25	0.633402	0.684	0.109	1.76791e-20	Fibroblasts_MGST1	PBX1
6.06422e-25	0.719539	0.605	0.089	2.26765e-20	Fibroblasts_MGST1	HTRA3
6.17645e-25	0.268662	0.184	0.005	2.30962e-20	Fibroblasts_MGST1	PLEKHA6
1.30659e-24	0.260338	0.158	0.003	4.88588e-20	Fibroblasts_MGST1	CXCL1
1.58808e-24	1.11548	1	0.404	5.93845e-20	Fibroblasts_MGST1	DPT
1.75214e-24	0.453444	0.368	0.03	6.55195e-20	Fibroblasts_MGST1	SSC5D
1.81948e-24	0.679479	0.763	0.143	6.80377e-20	Fibroblasts_MGST1	MAN1A1
2.39672e-24	0.946881	0.974	0.309	8.96231e-20	Fibroblasts_MGST1	PDGFRL
3.07325e-24	0.560895	0.579	0.08	1.14921e-19	Fibroblasts_MGST1	CDO1
4.93845e-24	0.833139	0.789	0.169	1.84668e-19	Fibroblasts_MGST1	MYC
6.85301e-24	0.84257	0.842	0.2	2.56261e-19	Fibroblasts_MGST1	LIFR
2.29657e-23	0.854273	0.947	0.286	8.58778e-19	Fibroblasts_MGST1	SGCE
2.32522e-23	0.810239	0.842	0.194	8.69494e-19	Fibroblasts_MGST1	ACKR3
7.81269e-23	0.320356	0.237	0.012	2.92148e-18	Fibroblasts_MGST1	RASSF9
8.69702e-23	0.557155	0.421	0.045	3.25216e-18	Fibroblasts_MGST1	MTUS1
5.50755e-22	0.524258	0.579	0.087	2.05949e-17	Fibroblasts_MGST1	SLC43A3
7.62849e-22	0.563627	0.658	0.113	2.8526e-17	Fibroblasts_MGST1	RGS10
1.29556e-21	0.372357	0.263	0.016	4.84462e-17	Fibroblasts_MGST1	ZNF385D
2.06896e-21	0.911345	0.763	0.164	7.73669e-17	Fibroblasts_MGST1	CCL2
2.36966e-21	0.820968	1	0.859	8.86111e-17	Fibroblasts_MGST1	GSN
3.56831e-21	0.821567	0.947	0.318	1.33433e-16	Fibroblasts_MGST1	FXYD1
3.58946e-21	0.634017	0.711	0.141	1.34224e-16	Fibroblasts_MGST1	NRP1
3.76903e-21	0.258956	0.211	0.01	1.40939e-16	Fibroblasts_MGST1	SHC2
4.50256e-21	0.72364	0.711	0.146	1.68369e-16	Fibroblasts_MGST1	FILIP1L
4.50572e-21	0.699943	0.658	0.126	1.68487e-16	Fibroblasts_MGST1	CAMK2N1
5.63495e-21	0.854467	0.974	0.274	2.10713e-16	Fibroblasts_MGST1	OGN
5.8494e-21	0.819428	1	0.376	2.18733e-16	Fibroblasts_MGST1	EPHX1
7.01946e-21	0.609249	0.658	0.121	2.62486e-16	Fibroblasts_MGST1	ABI3BP
8.73742e-21	0.670779	0.553	0.089	3.26727e-16	Fibroblasts_MGST1	NABP1
1.10311e-20	0.983484	0.974	0.531	4.12498e-16	Fibroblasts_MGST1	CXCL12
1.10326e-20	0.442684	0.421	0.048	4.12554e-16	Fibroblasts_MGST1	ABLIM1
1.29362e-20	0.938551	0.947	0.304	4.83738e-16	Fibroblasts_MGST1	WISP2
2.59737e-20	0.903842	0.921	0.356	9.7126e-16	Fibroblasts_MGST1	SPRY1
3.09059e-20	0.46118	0.421	0.05	1.1557e-15	Fibroblasts_MGST1	44623
3.20411e-20	0.611164	0.711	0.144	1.19815e-15	Fibroblasts_MGST1	CITED2
3.87962e-20	0.505113	0.553	0.087	1.45074e-15	Fibroblasts_MGST1	PTGER4
7.64362e-20	0.376381	0.342	0.033	2.85825e-15	Fibroblasts_MGST1	PACSIN3
9.7827e-20	0.264494	0.184	0.008	3.65814e-15	Fibroblasts_MGST1	WNT11
2.17925e-19	0.795792	0.895	0.286	8.14907e-15	Fibroblasts_MGST1	PLTP
3.71677e-19	0.846379	0.763	0.208	1.38985e-14	Fibroblasts_MGST1	PLAU
3.7429e-19	0.523115	0.5	0.077	1.39962e-14	Fibroblasts_MGST1	STEAP1
4.09948e-19	0.852642	0.921	0.434	1.53296e-14	Fibroblasts_MGST1	LHFPL6
7.45436e-19	0.693815	0.816	0.218	2.78748e-14	Fibroblasts_MGST1	NID1
8.67467e-19	0.669788	0.684	0.153	3.24381e-14	Fibroblasts_MGST1	PROCR
1.09709e-18	0.376277	0.368	0.041	4.10245e-14	Fibroblasts_MGST1	ASS1
1.1377e-18	1.12403	0.842	0.252	4.25433e-14	Fibroblasts_MGST1	CXCL14
1.3122e-18	0.507671	0.526	0.086	4.90684e-14	Fibroblasts_MGST1	ARHGAP24
2.28507e-18	0.329523	0.289	0.025	8.54479e-14	Fibroblasts_MGST1	DENND2A
2.90554e-18	0.540077	0.605	0.116	1.0865e-13	Fibroblasts_MGST1	GPC4
2.98943e-18	0.62321	1	0.804	1.11787e-13	Fibroblasts_MGST1	C1S
5.55021e-18	0.782679	0.895	0.324	2.07545e-13	Fibroblasts_MGST1	INTS6
6.59943e-18	0.592179	0.684	0.15	2.46779e-13	Fibroblasts_MGST1	CRISPLD2
8.15143e-18	0.664414	0.789	0.212	3.04815e-13	Fibroblasts_MGST1	SELENBP1
9.97465e-18	0.420155	0.421	0.057	3.72992e-13	Fibroblasts_MGST1	ARHGAP29
1.16264e-17	0.684643	0.947	0.317	4.34759e-13	Fibroblasts_MGST1	CD44
1.48367e-17	0.888493	0.816	0.243	5.54805e-13	Fibroblasts_MGST1	FMO2
[truncated: 444 more rows]
