# Supplementary material for: Single-cell sequencing analysis reveals the relationship between tumor microenvironment cells and oxidative stress in breast cancer bone metastases
Source: Aging (Albany NY). 2023 Jul 19;15(14):6950–68. doi: 10.18632/aging.204885 (PMC10415571; doi:10.18632/aging.204885)
Supplement: Supplementary Table 2 [file aging-15-204885-s004.xlsx]

## Sheet: Sheet1
Supplementary Table 2. Differentially expressed genes in subpopulations of MSC.
p_val	avg_log2FC	pct.1	pct.2	p_val_adj	cluster	gene
0	2.26878	0.463	0	0	MSC_MARCKSL1	GNB2L1
0	1.89249	0.441	0	0	MSC_MARCKSL1	ATP5E
0	1.77633	0.447	0	0	MSC_MARCKSL1	HN1
0	1.60023	0.452	0	0	MSC_MARCKSL1	ATP5G2
0	1.41695	0.452	0	0	MSC_MARCKSL1	TCEB2
0	1.33719	0.441	0	0	MSC_MARCKSL1	ATP5G3
2.99524e-306	1.27196	0.431	0	1.12004e-301	MSC_MARCKSL1	ATP5H
2.08028e-302	0.992306	0.426	0	7.779e-298	MSC_MARCKSL1	ATP5I
9.98868e-295	0.992306	0.415	0	3.73517e-290	MSC_MARCKSL1	ATPIF1
6.87674e-291	0.965047	0.41	0	2.57149e-286	MSC_MARCKSL1	ATP5O
6.9072e-291	1.23005	0.41	0	2.58288e-286	MSC_MARCKSL1	SEPW1
4.71446e-287	1.06746	0.404	0	1.76293e-282	MSC_MARCKSL1	TCEB1
3.1962e-283	0.896622	0.399	0	1.19519e-278	MSC_MARCKSL1	ATP5J
3.21501e-283	1.15277	0.399	0	1.20222e-278	MSC_MARCKSL1	ATP5L
2.16265e-279	0.867476	0.394	0	8.08702e-275	MSC_MARCKSL1	SELK
2.17301e-279	1.10005	0.394	0	8.12574e-275	MSC_MARCKSL1	MYEOV2
9.77047e-272	0.937264	0.383	0	3.65357e-267	MSC_MARCKSL1	USMG5
9.82939e-272	1.15277	0.383	0	3.6756e-267	MSC_MARCKSL1	GPX1
6.54306e-268	1.08204	0.378	0	2.44671e-263	MSC_MARCKSL1	ATP5B
4.30325e-264	0.758294	0.372	0	1.60916e-259	MSC_MARCKSL1	C14orf166
4.31977e-264	0.850553	0.372	0	1.61533e-259	MSC_MARCKSL1	ATP5J2
4.32955e-264	0.871676	0.372	0	1.61899e-259	MSC_MARCKSL1	SHFM1
1.87365e-256	0.816099	0.362	0	7.00631e-252	MSC_MARCKSL1	C19orf43
1.87874e-256	0.917086	0.362	0	7.02537e-252	MSC_MARCKSL1	C11orf31
1.88367e-256	1.23331	0.362	0	7.04381e-252	MSC_MARCKSL1	STRA13
5.13939e-245	0.762824	0.346	0	1.92182e-240	MSC_MARCKSL1	GLTSCR2
3.31023e-241	0.949237	0.34	0	1.23783e-236	MSC_MARCKSL1	WHSC1L1
2.11916e-237	0.762824	0.335	0	7.92438e-233	MSC_MARCKSL1	C16orf13
1.34657e-233	0.712198	0.33	0	5.03536e-229	MSC_MARCKSL1	SELT
8.48614e-230	0.615336	0.324	0	3.17331e-225	MSC_MARCKSL1	ATP5C1
8.54839e-230	0.758294	0.324	0	3.19658e-225	MSC_MARCKSL1	ATP5A1
5.36751e-226	0.62532	0.319	0	2.00713e-221	MSC_MARCKSL1	C14orf2
3.37126e-222	0.688585	0.314	0	1.26065e-217	MSC_MARCKSL1	PVRL2
3.39057e-222	0.953206	0.314	0	1.26787e-217	MSC_MARCKSL1	C20orf24
1.31036e-214	0.726182	0.303	0	4.89996e-210	MSC_MARCKSL1	FAM195A
1.31369e-214	1.1143	0.303	0	4.9124e-210	MSC_MARCKSL1	ATP5D
1.31436e-214	1.14238	0.303	0	4.91491e-210	MSC_MARCKSL1	ATP5G1
8.0492e-211	0.569532	0.298	0	3.00992e-206	MSC_MARCKSL1	APOA1BP
4.94302e-207	0.543443	0.293	0	1.84839e-202	MSC_MARCKSL1	WBSCR22
4.96076e-207	0.645083	0.293	0	1.85503e-202	MSC_MARCKSL1	VIMP
3.02019e-203	0.516874	0.287	0	1.12937e-198	MSC_MARCKSL1	RTFDC1
3.03002e-203	0.548699	0.287	0	1.13305e-198	MSC_MARCKSL1	C19orf60
1.8327e-199	0.516874	0.282	0	6.8532e-195	MSC_MARCKSL1	C9orf142
1.83966e-199	0.506107	0.282	0	6.87923e-195	MSC_MARCKSL1	ATP5F1
1.84763e-199	0.615336	0.282	0	6.90904e-195	MSC_MARCKSL1	LINC01420
1.85301e-199	0.798558	0.282	0	6.92913e-195	MSC_MARCKSL1	SELM
3.23741e-199	0.584053	0.293	0.001	1.2106e-194	MSC_MARCKSL1	GREB1
1.11754e-195	0.584963	0.277	0	4.17892e-191	MSC_MARCKSL1	NGFRAP1
2.10427e-192	2.00321	0.324	0.003	7.86871e-188	MSC_MARCKSL1	TFF3
6.75432e-192	0.767339	0.271	0	2.52571e-187	MSC_MARCKSL1	C17orf89
4.02556e-188	0.52756	0.266	0	1.50532e-183	MSC_MARCKSL1	SEPP1
7.19279e-186	1.00691	0.426	0.015	2.68967e-181	MSC_MARCKSL1	GATA3
2.39739e-184	0.439765	0.261	0	8.9648e-180	MSC_MARCKSL1	C21orf59
2.41168e-184	0.610318	0.261	0	9.01825e-180	MSC_MARCKSL1	ICT1
1.41979e-180	0.411195	0.255	0	5.30916e-176	MSC_MARCKSL1	C17orf62
1.42246e-180	0.451036	0.255	0	5.31913e-176	MSC_MARCKSL1	SCO2
1.4233e-180	0.439765	0.255	0	5.32228e-176	MSC_MARCKSL1	44819
8.40809e-177	0.422691	0.25	0	3.14412e-172	MSC_MARCKSL1	MESDC2
8.40945e-177	0.434096	0.25	0	3.14463e-172	MSC_MARCKSL1	LINC00998
4.95573e-173	0.473317	0.245	0	1.85314e-168	MSC_MARCKSL1	C11orf73
2.87796e-169	0.364274	0.239	0	1.07618e-164	MSC_MARCKSL1	MTL5
2.89751e-169	0.456638	0.239	0	1.08349e-164	MSC_MARCKSL1	HN1L
1.68778e-165	10:57:33.558000	0.234	0	6.31128e-161	MSC_MARCKSL1	UFD1L
9.72901e-162	0.376148	0.229	0	3.63807e-157	MSC_MARCKSL1	UTP11L
9.75231e-162	0.399607	0.229	0	3.64678e-157	MSC_MARCKSL1	C7orf73
5.6014e-158	0.364274	0.223	0	2.09459e-153	MSC_MARCKSL1	FAM134A
5.64684e-158	0.683816	0.223	0	2.11158e-153	MSC_MARCKSL1	AC018816.3
3.20608e-154	0.334154	0.218	0	1.19888e-149	MSC_MARCKSL1	GBAS
3.209e-154	0.340229	0.218	0	1.19998e-149	MSC_MARCKSL1	PPP2R4
3.21662e-154	0.364274	0.218	0	1.20282e-149	MSC_MARCKSL1	FAM127B
3.22054e-154	0.370224	0.218	0	1.20429e-149	MSC_MARCKSL1	KIAA0907
1.04138e-146	0.315776	0.207	0	3.89415e-142	MSC_MARCKSL1	LINC00657
1.04287e-146	0.334154	0.207	0	3.89972e-142	MSC_MARCKSL1	FAM103A1
1.04351e-146	0.352302	0.207	0	3.90211e-142	MSC_MARCKSL1	CTD-2015H6.3
1.04469e-146	0.3583	0.207	0	3.90652e-142	MSC_MARCKSL1	LINC00493
1.04489e-146	0.411195	0.207	0	3.90728e-142	MSC_MARCKSL1	FAM195B
5.89393e-143	0.346278	0.202	0	2.20397e-138	MSC_MARCKSL1	MGEA5
5.90924e-143	0.3583	0.202	0	2.2097e-138	MSC_MARCKSL1	C14orf1
1.38215e-142	0.354212	0.218	0.001	5.16843e-138	MSC_MARCKSL1	HAGLROS
3.30999e-139	0.303392	0.197	0	1.23774e-134	MSC_MARCKSL1	MLLT4
3.31247e-139	0.309597	0.197	0	1.23867e-134	MSC_MARCKSL1	CPSF3L
3.3146e-139	0.303392	0.197	0	1.23946e-134	MSC_MARCKSL1	CCDC53
3.31471e-139	0.309597	0.197	0	1.2395e-134	MSC_MARCKSL1	RP11-792A8.4
3.33041e-139	0.48433	0.197	0	1.24537e-134	MSC_MARCKSL1	PROSC
7.22275e-139	0.513074	0.293	0.008	2.70088e-134	MSC_MARCKSL1	HID1
9.01156e-139	0.474745	0.239	0.003	3.36978e-134	MSC_MARCKSL1	CDH1
3.366e-138	0.75196	0.309	0.009	1.25868e-133	MSC_MARCKSL1	TTC39A
1.85539e-135	0.303392	0.191	0	6.93804e-131	MSC_MARCKSL1	RP11-532F12.5
1.85967e-135	0.334154	0.191	0	6.95404e-131	MSC_MARCKSL1	AC093323.3
1.86681e-135	0.816099	0.191	0	6.98074e-131	MSC_MARCKSL1	KIAA0101
1.03493e-131	0.303392	0.186	0	3.87001e-127	MSC_MARCKSL1	FAM60A
1.0365e-131	0.340229	0.186	0	3.87588e-127	MSC_MARCKSL1	CCDC64B
1.03885e-131	0.405413	0.186	0	3.88469e-127	MSC_MARCKSL1	MMP24-AS1
9.54606e-129	0.869403	0.207	0.002	3.56965e-124	MSC_MARCKSL1	SERPINA1
5.7445e-128	0.303392	0.181	0	2.1481e-123	MSC_MARCKSL1	TMEM261
5.76614e-128	0.49526	0.181	0	2.15619e-123	MSC_MARCKSL1	AC090498.1
5.77013e-128	1.49798	0.181	0	2.15768e-123	MSC_MARCKSL1	SERPINA6
2.02204e-124	1.40416	0.277	0.009	7.56123e-120	MSC_MARCKSL1	NPW
3.16483e-124	0.26559	0.176	0	1.18346e-119	MSC_MARCKSL1	PYCRL
3.1743e-124	0.321928	0.176	0	1.187e-119	MSC_MARCKSL1	RP11-12G12.7
2.26565e-121	0.38293	0.218	0.003	8.47216e-117	MSC_MARCKSL1	SNX10
1.74046e-120	0.259192	0.17	0	6.50829e-116	MSC_MARCKSL1	C6orf1
1.74049e-120	0.27196	0.17	0	6.50839e-116	MSC_MARCKSL1	CH17-340M24.3
1.74369e-120	0.29716	0.17	0	6.52037e-116	MSC_MARCKSL1	RP1-313I6.12
1.74617e-120	0.522227	0.17	0	6.52962e-116	MSC_MARCKSL1	CTA-29F11.1
2.72006e-120	0.780347	0.176	0	1.01714e-115	MSC_MARCKSL1	EREG
3.92188e-118	0.693276	0.25	0.007	1.46655e-113	MSC_MARCKSL1	HSPB8
3.50581e-117	1.23354	0.473	0.046	1.31096e-112	MSC_MARCKSL1	SLC9A3R1
9.52567e-117	0.259192	0.165	0	3.56203e-112	MSC_MARCKSL1	RP11-1094M14.11
9.52589e-117	0.26559	0.165	0	3.56211e-112	MSC_MARCKSL1	HRSP12
9.53034e-117	0.284615	0.165	0	3.56378e-112	MSC_MARCKSL1	ECE2
9.53742e-117	0.29716	0.165	0	3.56642e-112	MSC_MARCKSL1	CECR5
9.54077e-117	0.328054	0.165	0	3.56767e-112	MSC_MARCKSL1	LINC00152
4.92902e-113	0.4384	0.176	0.001	1.84316e-108	MSC_MARCKSL1	KISS1R
3.44908e-110	0.642641	0.351	0.022	1.28975e-105	MSC_MARCKSL1	PRLR
3.92252e-110	0.878194	0.527	0.062	1.46679e-105	MSC_MARCKSL1	VAMP8
2.81129e-109	0.259192	0.154	0	1.05125e-104	MSC_MARCKSL1	WBP5
2.81237e-109	0.284615	0.154	0	1.05166e-104	MSC_MARCKSL1	APITD1
5.35873e-109	0.398243	0.16	0	2.00384e-104	MSC_MARCKSL1	RBP7
1.39982e-108	0.513975	0.25	0.008	5.23448e-104	MSC_MARCKSL1	PARD6B
9.62997e-108	0.353396	0.229	0.006	3.60103e-103	MSC_MARCKSL1	FBP1
3.57738e-106	0.757223	0.447	0.044	1.33772e-101	MSC_MARCKSL1	SPDEF
2.46635e-105	0.484457	0.309	0.017	9.22265e-101	MSC_MARCKSL1	PLPP2
1.45926e-104	1.17912	0.25	0.009	5.45676e-100	MSC_MARCKSL1	BIRC5
1.44468e-103	0.39688	0.176	0.002	5.40225e-99	MSC_MARCKSL1	GATA3-AS1
8.2634e-103	0.744649	0.17	0.002	3.09002e-98	MSC_MARCKSL1	RAMP3
1.68854e-102	0.702839	0.25	0.009	6.31411e-98	MSC_MARCKSL1	WFDC2
7.32381e-102	0.270595	0.16	0.001	2.73867e-97	MSC_MARCKSL1	GPT
7.41118e-100	0.315573	0.197	0.004	2.77134e-95	MSC_MARCKSL1	TJP3
1.19881e-99	0.468944	0.255	0.011	4.48282e-95	MSC_MARCKSL1	POLR2J3
1.41833e-99	0.537821	0.218	0.006	5.30371e-95	MSC_MARCKSL1	MYBL2
1.79014e-99	0.462439	0.218	0.006	6.69405e-95	MSC_MARCKSL1	C19orf33
4.05254e-99	0.798927	0.431	0.044	1.51541e-94	MSC_MARCKSL1	TPD52
7.70736e-99	0.29885	0.181	0.003	2.88209e-94	MSC_MARCKSL1	SYNE4
8.58858e-99	0.279619	0.181	0.003	3.21161e-94	MSC_MARCKSL1	EPN3
1.94372e-97	0.387827	0.218	0.007	7.26837e-93	MSC_MARCKSL1	MB
2.5944e-97	0.443054	0.229	0.008	9.70151e-93	MSC_MARCKSL1	TNNT1
1.80659e-96	0.727512	0.468	0.055	6.75557e-92	MSC_MARCKSL1	SMIM22
1.2708e-95	0.408788	0.197	0.005	4.75203e-91	MSC_MARCKSL1	RAB17
2.09495e-94	0.418538	0.261	0.013	7.83386e-90	MSC_MARCKSL1	MAPK13
2.3207e-94	0.252766	0.133	0	8.67804e-90	MSC_MARCKSL1	FDX1L
2.97418e-94	0.273305	0.17	0.003	1.11216e-89	MSC_MARCKSL1	C16orf74
2.17197e-93	0.702756	0.33	0.025	8.12187e-89	MSC_MARCKSL1	HIST1H2BD
1.06215e-92	0.574683	0.218	0.008	3.9718e-88	MSC_MARCKSL1	SLITRK6
9.16971e-92	0.261955	0.154	0.002	3.42892e-87	MSC_MARCKSL1	FOXD3-AS1
4.73948e-90	0.670483	0.447	0.054	1.77228e-85	MSC_MARCKSL1	PAFAH1B3
4.77543e-89	1.1405	0.479	0.067	1.78572e-84	MSC_MARCKSL1	CKS2
6.59686e-88	0.600905	0.239	0.011	2.46683e-83	MSC_MARCKSL1	AKR7A3
4.01725e-87	0.393488	0.266	0.015	1.50221e-82	MSC_MARCKSL1	UCP2
5.40469e-87	0.273305	0.17	0.003	2.02103e-82	MSC_MARCKSL1	SH2D3A
6.49397e-87	0.315776	0.122	0	2.42835e-82	MSC_MARCKSL1	SGOL1
3.95804e-86	0.794489	0.41	0.047	1.48007e-81	MSC_MARCKSL1	CRACR2B
7.40081e-85	0.512785	0.16	0.003	2.76746e-80	MSC_MARCKSL1	GAL
4.91808e-84	0.769251	0.463	0.063	1.83907e-79	MSC_MARCKSL1	TSPAN13
4.5715e-83	0.270135	0.186	0.006	1.70947e-78	MSC_MARCKSL1	ZC3H11A
1.8115e-81	0.417922	0.255	0.015	6.77394e-77	MSC_MARCKSL1	ICA1
4.32678e-80	0.31492	0.207	0.009	1.61796e-75	MSC_MARCKSL1	GSTO2
8.6327e-79	0.624672	0.277	0.02	3.22811e-74	MSC_MARCKSL1	PCSK1N
6.08986e-78	0.469318	0.362	0.038	2.27724e-73	MSC_MARCKSL1	RAB25
2.5704e-76	1.47017	0.537	0.104	9.61177e-72	MSC_MARCKSL1	CLDN3
7.841e-76	0.252384	0.16	0.004	2.93206e-71	MSC_MARCKSL1	SYTL1
9.71518e-76	0.256519	0.16	0.004	3.63289e-71	MSC_MARCKSL1	GALNT6
9.83209e-76	0.832846	0.532	0.097	3.67661e-71	MSC_MARCKSL1	EPCAM
1.059e-75	1.0617	0.484	0.079	3.96002e-71	MSC_MARCKSL1	MGST1
1.15597e-75	0.513117	0.303	0.027	4.32264e-71	MSC_MARCKSL1	ZG16B
1.42757e-75	0.265135	0.112	0	5.33826e-71	MSC_MARCKSL1	SYT1
1.73232e-74	0.523682	0.197	0.009	6.47782e-70	MSC_MARCKSL1	BCAM
1.86841e-73	0.303093	0.186	0.008	6.98674e-69	MSC_MARCKSL1	TMEM125
3.02015e-73	0.279572	0.181	0.007	1.12935e-68	MSC_MARCKSL1	AC007325.4
2.21352e-72	1.95245	0.697	0.228	8.27723e-68	MSC_MARCKSL1	KRT18
3.04945e-72	0.974558	0.245	0.017	1.14031e-67	MSC_MARCKSL1	TK1
4.83637e-72	0.259192	0.101	0	1.80851e-67	MSC_MARCKSL1	C1orf64
1.36978e-71	0.298268	0.17	0.006	5.12215e-67	MSC_MARCKSL1	SPC25
2.70401e-71	1.29217	0.543	0.114	1.01114e-66	MSC_MARCKSL1	STMN1
3.76959e-70	0.310599	0.17	0.006	1.4096e-65	MSC_MARCKSL1	EHF
4.10601e-70	0.955374	0.404	0.059	1.5354e-65	MSC_MARCKSL1	SYNGR2
7.22802e-70	0.762436	0.335	0.038	2.70284e-65	MSC_MARCKSL1	HMGA1
9.04872e-70	0.467682	0.229	0.015	3.38368e-65	MSC_MARCKSL1	RAC3
1.2733e-68	0.633561	0.399	0.056	4.76138e-64	MSC_MARCKSL1	MAL2
1.36074e-68	0.280927	0.17	0.007	5.08837e-64	MSC_MARCKSL1	PRRG4
1.40351e-68	1.28541	0.564	0.133	5.24827e-64	MSC_MARCKSL1	S100A14
6.83528e-68	0.319002	0.207	0.012	2.55599e-63	MSC_MARCKSL1	CENPM
1.47559e-67	0.352945	0.176	0.008	5.51783e-63	MSC_MARCKSL1	NUF2
1.81944e-67	0.352588	0.202	0.011	6.8036e-63	MSC_MARCKSL1	DEGS2
1.61779e-66	2.66972	0.537	0.128	6.04958e-62	MSC_MARCKSL1	ALDOA
1.70073e-66	0.390805	0.223	0.015	6.3597e-62	MSC_MARCKSL1	RAMP2
3.64621e-66	0.51434	0.197	0.011	1.36346e-61	MSC_MARCKSL1	MEST
7.8197e-66	1.27896	0.713	0.24	2.9241e-61	MSC_MARCKSL1	MARCKSL1
1.24675e-65	0.327346	0.149	0.005	4.66209e-61	MSC_MARCKSL1	PRSS22
7.28602e-65	0.333492	0.229	0.017	2.72453e-60	MSC_MARCKSL1	TMEM97
3.28674e-64	0.349788	0.17	0.008	1.22904e-59	MSC_MARCKSL1	AURKA
6.79719e-64	0.328705	0.128	0.003	2.54174e-59	MSC_MARCKSL1	NMU
2.72865e-63	1.56366	0.691	0.241	1.02035e-58	MSC_MARCKSL1	KRT8
3.19574e-63	0.341282	0.133	0.003	1.19501e-58	MSC_MARCKSL1	SUSD3
5.63969e-63	0.288628	0.112	0.002	2.1089e-58	MSC_MARCKSL1	IL20
5.65094e-63	0.32794	0.218	0.015	2.11311e-58	MSC_MARCKSL1	STRBP
1.00265e-62	0.439397	0.239	0.02	3.74929e-58	MSC_MARCKSL1	PVT1
1.12879e-62	1.24996	0.234	0.019	4.22101e-58	MSC_MARCKSL1	UBE2C
2.40817e-61	0.605813	0.441	0.078	9.00512e-57	MSC_MARCKSL1	OCIAD2
1.3505e-60	1.04187	0.989	0.999	5.05006e-56	MSC_MARCKSL1	PTMA
8.14831e-60	0.9546	0.34	0.048	3.04698e-55	MSC_MARCKSL1	HMGB3
1.03764e-59	0.366736	0.213	0.016	3.88016e-55	MSC_MARCKSL1	PRSS8
5.74458e-59	0.380122	0.234	0.02	2.14813e-54	MSC_MARCKSL1	AP1M2
9.55255e-59	1.0529	0.319	0.043	3.57208e-54	MSC_MARCKSL1	PITX1
1.71228e-58	0.456525	0.245	0.023	6.40291e-54	MSC_MARCKSL1	RERG
2.28215e-58	0.262465	0.181	0.011	8.53388e-54	MSC_MARCKSL1	FBXO2
2.96522e-58	1.47557	0.622	0.196	1.10881e-53	MSC_MARCKSL1	CLDN4
7.11969e-58	0.577442	0.282	0.032	2.66234e-53	MSC_MARCKSL1	HIST3H2A
9.90293e-58	1.67459	0.367	0.06	3.7031e-53	MSC_MARCKSL1	CAPS
2.54832e-57	0.615457	0.41	0.073	9.52918e-53	MSC_MARCKSL1	TSTD1
4.63069e-57	3.41096	1	1	1.7316e-52	MSC_MARCKSL1	MALAT1
5.07619e-57	0.573633	0.266	0.029	1.89819e-52	MSC_MARCKSL1	BCAS4
1.16015e-56	0.350446	0.207	0.016	4.33827e-52	MSC_MARCKSL1	F12
1.24881e-56	0.677543	0.197	0.014	4.66982e-52	MSC_MARCKSL1	EDN1
2.71262e-56	0.285236	0.207	0.016	1.01436e-51	MSC_MARCKSL1	KRTCAP3
3.91265e-56	0.349999	0.213	0.017	1.4631e-51	MSC_MARCKSL1	REEP6
8.72682e-56	0.884456	0.394	0.071	3.26331e-51	MSC_MARCKSL1	TRAF4
1.58941e-55	2.43985	0.798	0.433	5.94346e-51	MSC_MARCKSL1	KRT19
1.80228e-55	0.714454	0.202	0.016	6.73944e-51	MSC_MARCKSL1	NOVA1
2.14324e-55	0.283511	0.186	0.013	8.01443e-51	MSC_MARCKSL1	CERS4
2.15989e-55	1.3529	0.989	0.975	8.07668e-51	MSC_MARCKSL1	RPL7
2.74962e-55	0.598967	0.255	0.027	1.02819e-50	MSC_MARCKSL1	RHOV
4.63403e-55	0.86824	0.207	0.017	1.73285e-50	MSC_MARCKSL1	CDC20
4.68675e-55	0.847479	1	0.996	1.75256e-50	MSC_MARCKSL1	RPS14
6.40183e-55	0.415507	0.261	0.028	2.3939e-50	MSC_MARCKSL1	FOXA1
1.64991e-54	1.17537	0.995	0.999	6.16969e-50	MSC_MARCKSL1	RPS18
2.52301e-54	0.336015	0.17	0.01	9.43454e-50	MSC_MARCKSL1	TACC3
3.3148e-54	1.45408	0.516	0.133	1.23954e-49	MSC_MARCKSL1	AREG
3.89912e-54	1.16257	1	0.997	1.45804e-49	MSC_MARCKSL1	RPL32
4.51999e-54	1.64841	1	0.994	1.69021e-49	MSC_MARCKSL1	RPL8
5.08136e-54	0.469192	0.207	0.017	1.90012e-49	MSC_MARCKSL1	TPX2
1.17792e-53	1.63405	0.989	0.999	4.40473e-49	MSC_MARCKSL1	FTH1
1.29116e-53	0.629309	0.298	0.04	4.82817e-49	MSC_MARCKSL1	UBE2T
2.66404e-53	0.284026	0.154	0.008	9.96193e-49	MSC_MARCKSL1	MREG
4.77184e-53	0.569551	0.372	0.064	1.78438e-48	MSC_MARCKSL1	CLDN7
1.14874e-52	0.32502	0.218	0.02	4.29562e-48	MSC_MARCKSL1	NUPR2
3.02518e-52	0.331075	0.186	0.014	1.13124e-47	MSC_MARCKSL1	SLC25A10
3.28148e-52	0.286656	0.17	0.011	1.22708e-47	MSC_MARCKSL1	CLN3
4.54594e-52	0.292757	0.186	0.014	1.69991e-47	MSC_MARCKSL1	FSIP1
8.43693e-52	0.608134	0.165	0.01	3.15491e-47	MSC_MARCKSL1	EDN2
9.03442e-52	0.297943	0.112	0.003	3.37833e-47	MSC_MARCKSL1	CENPA
1.00667e-51	0.727697	0.989	0.979	3.76433e-47	MSC_MARCKSL1	RPS7
1.9404e-51	0.660948	0.207	0.019	7.25592e-47	MSC_MARCKSL1	CDKN3
2.95892e-51	0.293653	0.165	0.01	1.10646e-46	MSC_MARCKSL1	MKI67
4.31243e-51	1.33017	0.989	0.999	1.61259e-46	MSC_MARCKSL1	RPL10
6.59346e-51	0.322364	0.191	0.015	2.46556e-46	MSC_MARCKSL1	AFF3
8.09007e-51	0.822628	0.984	0.997	3.0252e-46	MSC_MARCKSL1	RPS15
1.08525e-50	1.78909	1	0.996	4.05818e-46	MSC_MARCKSL1	RPS2
1.43025e-50	0.387827	0.149	0.008	5.34828e-46	MSC_MARCKSL1	CDCA3
2.40755e-50	0.689349	0.202	0.018	9.00279e-46	MSC_MARCKSL1	TOP2A
3.9137e-50	0.259806	0.181	0.014	1.46349e-45	MSC_MARCKSL1	CRB3
4.37422e-50	0.482735	0.234	0.026	1.6357e-45	MSC_MARCKSL1	ZWINT
4.59479e-50	0.965472	1	0.999	1.71818e-45	MSC_MARCKSL1	RPL41
2.21846e-49	0.774468	0.25	0.03	8.29573e-45	MSC_MARCKSL1	ANKRD30A
2.16681e-48	0.831645	0.989	0.991	8.10256e-44	MSC_MARCKSL1	RPS8
1.31619e-47	0.461312	0.186	0.016	4.92175e-43	MSC_MARCKSL1	RNASEH2A
6.38944e-47	0.333492	0.191	0.017	2.38927e-42	MSC_MARCKSL1	CENPN
1.22808e-46	1.94945	0.346	0.065	4.5923e-42	MSC_MARCKSL1	RAB11FIP1
1.50962e-46	0.325743	0.149	0.009	5.64506e-42	MSC_MARCKSL1	PKMYT1
2.20867e-46	2.8041	0.324	0.058	8.25909e-42	MSC_MARCKSL1	TFF1
2.37988e-46	1.07936	0.691	0.316	8.89931e-42	MSC_MARCKSL1	SPINT2
3.52474e-46	1.33111	1	0.994	1.31804e-41	MSC_MARCKSL1	RPL13A
6.34632e-46	0.444037	0.33	0.057	2.37314e-41	MSC_MARCKSL1	YDJC
8.48802e-46	0.258019	0.181	0.015	3.17401e-41	MSC_MARCKSL1	C6orf132
2.19624e-45	0.358484	0.245	0.031	8.21262e-41	MSC_MARCKSL1	LRRC26
3.76981e-45	0.814086	0.553	0.177	1.40968e-40	MSC_MARCKSL1	NINJ1
8.01459e-45	0.823766	1	0.994	2.99698e-40	MSC_MARCKSL1	RPS19
9.79575e-45	0.415025	0.319	0.054	3.66302e-40	MSC_MARCKSL1	LSR
1.82927e-44	0.288542	0.122	0.006	6.84038e-40	MSC_MARCKSL1	PLK1
1.83956e-44	0.373095	0.282	0.042	6.87886e-40	MSC_MARCKSL1	SPINT1
2.00115e-44	0.66934	1	0.997	7.48309e-40	MSC_MARCKSL1	RPL3
2.8651e-44	1.55143	0.989	0.993	1.07138e-39	MSC_MARCKSL1	GAPDH
3.74748e-44	0.875267	0.989	0.992	1.40133e-39	MSC_MARCKSL1	RPS3
6.31511e-44	0.758829	0.489	0.136	2.36147e-39	MSC_MARCKSL1	FXYD3
7.90149e-44	0.432277	0.229	0.028	2.95468e-39	MSC_MARCKSL1	CST6
1.71827e-43	0.514887	0.213	0.024	6.4253e-39	MSC_MARCKSL1	CENPU
2.27688e-43	0.342152	0.165	0.014	8.51415e-39	MSC_MARCKSL1	GINS2
3.54286e-43	0.350103	0.202	0.022	1.32482e-38	MSC_MARCKSL1	QPRT
3.7624e-43	0.469436	0.239	0.032	1.40691e-38	MSC_MARCKSL1	MAD2L1
4.14253e-43	0.679031	1	0.995	1.54906e-38	MSC_MARCKSL1	EIF1
4.14859e-43	1.21563	0.511	0.16	1.55132e-38	MSC_MARCKSL1	ELF3
4.65855e-43	0.31483	0.218	0.026	1.74202e-38	MSC_MARCKSL1	F11R
4.96684e-43	0.306344	0.213	0.024	1.8573e-38	MSC_MARCKSL1	RBM47
9.65645e-43	0.273715	0.149	0.011	3.61093e-38	MSC_MARCKSL1	PBK
1.24427e-42	0.306219	0.186	0.018	4.65284e-38	MSC_MARCKSL1	PRC1
1.54308e-42	0.421045	0.25	0.035	5.77021e-38	MSC_MARCKSL1	HIST2H2BE
5.08369e-42	0.309618	0.197	0.021	1.901e-37	MSC_MARCKSL1	EGLN2
5.66374e-40	0.307838	0.191	0.021	2.1179e-35	MSC_MARCKSL1	LMNB1
7.9302e-40	1.47308	0.819	0.641	2.96542e-35	MSC_MARCKSL1	XBP1
1.35262e-39	0.314389	0.207	0.025	5.05799e-35	MSC_MARCKSL1	LLGL2
1.61155e-39	0.577485	0.995	0.989	6.02624e-35	MSC_MARCKSL1	RPL30
1.65706e-39	0.264716	0.133	0.009	6.19642e-35	MSC_MARCKSL1	CELSR2
4.15415e-39	0.293992	0.17	0.017	1.5534e-34	MSC_MARCKSL1	RHPN1
6.42209e-39	0.339317	0.144	0.011	2.40147e-34	MSC_MARCKSL1	CCNB2
1.92037e-38	1.23074	0.537	0.205	7.18102e-34	MSC_MARCKSL1	STARD10
6.17477e-38	0.48991	0.324	0.066	2.30899e-33	MSC_MARCKSL1	DSP
1.05176e-37	0.781876	0.495	0.163	3.93295e-33	MSC_MARCKSL1	FKBP4
1.31565e-37	0.432064	0.319	0.065	4.91976e-33	MSC_MARCKSL1	FAM213A
7.73647e-37	0.34951	0.255	0.042	2.89297e-32	MSC_MARCKSL1	SLC38A1
9.74412e-37	0.280225	0.207	0.027	3.64372e-32	MSC_MARCKSL1	LRR1
1.44912e-36	0.500771	0.34	0.076	5.41883e-32	MSC_MARCKSL1	GFRA1
2.92709e-36	0.254573	0.191	0.023	1.09456e-31	MSC_MARCKSL1	BSPRY
3.07366e-36	0.610357	0.447	0.13	1.14937e-31	MSC_MARCKSL1	SERINC2
3.11824e-36	1.25615	0.984	0.993	1.16604e-31	MSC_MARCKSL1	H3F3B
6.31228e-36	0.391818	0.303	0.06	2.36041e-31	MSC_MARCKSL1	NDUFAF6
8.55194e-36	1.23755	0.277	0.054	3.19791e-31	MSC_MARCKSL1	PTTG1
1.64309e-35	0.775533	0.989	0.993	6.14417e-31	MSC_MARCKSL1	RPL18
6.42428e-35	0.336785	0.16	0.017	2.4023e-30	MSC_MARCKSL1	TM7SF2
6.70305e-35	0.268336	0.202	0.027	2.50654e-30	MSC_MARCKSL1	STAP2
1.3572e-34	0.481433	0.335	0.078	5.0751e-30	MSC_MARCKSL1	UTP18
1.5464e-34	1.30574	0.979	0.986	5.7826e-30	MSC_MARCKSL1	RPL23A
1.58495e-34	0.603786	0.984	0.987	5.92676e-30	MSC_MARCKSL1	RPS15A
2.07042e-34	1.38053	0.915	0.911	7.74214e-30	MSC_MARCKSL1	PPDPF
2.13606e-34	0.626764	0.404	0.112	7.98759e-30	MSC_MARCKSL1	FASN
4.04949e-34	0.777619	0.973	0.971	1.51427e-29	MSC_MARCKSL1	RPS5
5.53292e-34	0.559332	0.984	0.991	2.06898e-29	MSC_MARCKSL1	RPS27A
6.18668e-34	0.734861	0.995	0.99	2.31345e-29	MSC_MARCKSL1	RPS3A
8.04823e-34	0.827166	0.957	0.976	3.00956e-29	MSC_MARCKSL1	RPLP0
8.24689e-34	0.725598	1	0.998	3.08384e-29	MSC_MARCKSL1	RPLP1
9.54106e-34	0.34876	0.223	0.035	3.56778e-29	MSC_MARCKSL1	DHCR24
2.05734e-33	0.254132	0.202	0.029	7.69323e-29	MSC_MARCKSL1	ERBB3
2.08772e-33	0.507757	0.989	0.986	7.80681e-29	MSC_MARCKSL1	RPS16
3.19853e-33	0.740042	0.995	1	1.19606e-28	MSC_MARCKSL1	RPL13
3.68769e-33	0.335653	0.223	0.036	1.37897e-28	MSC_MARCKSL1	ESR1
5.56481e-33	0.820463	0.495	0.175	2.08091e-28	MSC_MARCKSL1	PIM3
5.56552e-33	0.899238	0.378	0.102	2.08117e-28	MSC_MARCKSL1	KPNA2
5.83869e-33	0.257621	0.181	0.023	2.18332e-28	MSC_MARCKSL1	MTFP1
7.90512e-33	0.705358	0.947	0.951	2.95604e-28	MSC_MARCKSL1	OAZ1
1.25007e-32	0.314067	0.25	0.045	4.6745e-28	MSC_MARCKSL1	VPS37B
1.90626e-32	0.508883	1	0.996	7.12828e-28	MSC_MARCKSL1	RPL11
2.44513e-32	0.608384	0.989	0.991	9.14331e-28	MSC_MARCKSL1	RPS6
2.84257e-32	0.274442	0.207	0.031	1.06295e-27	MSC_MARCKSL1	VAV3
3.9728e-32	0.260327	0.181	0.024	1.48559e-27	MSC_MARCKSL1	TSEN54
4.96074e-32	0.353491	0.202	0.031	1.85502e-27	MSC_MARCKSL1	KIAA1324
6.45966e-32	0.408527	0.968	0.985	2.41553e-27	MSC_MARCKSL1	FAU
1.80923e-31	0.725277	0.995	0.995	6.76543e-27	MSC_MARCKSL1	RPS4X
2.33846e-31	0.269679	0.117	0.009	8.74443e-27	MSC_MARCKSL1	ASF1B
3.0597e-31	0.255899	0.181	0.025	1.14414e-26	MSC_MARCKSL1	CXADR
3.64791e-31	0.506224	0.245	0.047	1.3641e-26	MSC_MARCKSL1	TYMS
3.70443e-31	0.687568	0.303	0.071	1.38523e-26	MSC_MARCKSL1	AGR3
5.89291e-31	0.789267	0.979	0.991	2.20359e-26	MSC_MARCKSL1	RPL6
1.76838e-30	0.336092	0.213	0.036	6.61268e-26	MSC_MARCKSL1	CENPW
1.86108e-30	0.632395	0.979	0.99	6.95934e-26	MSC_MARCKSL1	RPL12
1.98432e-30	1.42633	1	1	7.42016e-26	MSC_MARCKSL1	MT-CO1
3.03284e-30	0.40304	0.154	0.019	1.1341e-25	MSC_MARCKSL1	CDK1
5.16686e-30	0.633848	0.814	0.709	1.93209e-25	MSC_MARCKSL1	HMGN1
7.19351e-30	0.387132	0.277	0.06	2.68994e-25	MSC_MARCKSL1	DDR1
1.1282e-29	0.587332	0.293	0.068	4.21877e-25	MSC_MARCKSL1	GPRC5A
1.23714e-29	0.709862	0.362	0.105	4.62618e-25	MSC_MARCKSL1	SCD
1.36147e-29	0.541428	0.415	0.131	5.09108e-25	MSC_MARCKSL1	MTHFD2
1.50904e-29	0.37389	0.101	0.007	5.64291e-25	MSC_MARCKSL1	CXCR4
2.12511e-29	0.381823	0.202	0.033	7.94665e-25	MSC_MARCKSL1	ATF5
2.37138e-29	1.40252	0.995	0.999	8.86753e-25	MSC_MARCKSL1	MT-CO2
3.50091e-29	0.996749	0.495	0.194	1.30913e-24	MSC_MARCKSL1	CKS1B
5.76935e-29	0.263922	0.191	0.03	2.15739e-24	MSC_MARCKSL1	TACC2
6.34323e-29	0.673243	0.521	0.207	2.37199e-24	MSC_MARCKSL1	IDH2
6.63814e-29	0.570224	0.979	0.991	2.48227e-24	MSC_MARCKSL1	RPL35A
8.50464e-29	0.380527	0.197	0.032	3.18023e-24	MSC_MARCKSL1	FEN1
5.28445e-28	1.39941	0.989	1	1.97607e-23	MSC_MARCKSL1	MT-CO3
5.57483e-28	0.658401	0.441	0.155	2.08465e-23	MSC_MARCKSL1	MLPH
5.79023e-28	0.578308	0.277	0.067	2.1652e-23	MSC_MARCKSL1	SLC27A5
5.82053e-28	0.478463	0.367	0.11	2.17653e-23	MSC_MARCKSL1	AMZ2
7.36064e-28	0.48855	0.197	0.034	2.75244e-23	MSC_MARCKSL1	CENPF
7.90528e-28	1.03106	0.995	1	2.9561e-23	MSC_MARCKSL1	MT-ND2
8.37326e-28	0.269226	0.133	0.015	3.1311e-23	MSC_MARCKSL1	RAC2
9.61424e-28	0.376136	0.16	0.022	3.59515e-23	MSC_MARCKSL1	NUSAP1
1.06495e-27	0.395896	0.229	0.044	3.98226e-23	MSC_MARCKSL1	TFAP2A
1.2912e-27	0.740326	0.968	0.992	4.8283e-23	MSC_MARCKSL1	RPL18A
1.39779e-27	0.263016	0.176	0.026	5.22689e-23	MSC_MARCKSL1	CTXN1
1.54956e-27	0.264769	0.154	0.02	5.79442e-23	MSC_MARCKSL1	CENPH
1.61642e-27	0.484317	0.271	0.063	6.04443e-23	MSC_MARCKSL1	EEF1G
2.46122e-27	0.737773	0.176	0.028	9.20349e-23	MSC_MARCKSL1	CCNB1
2.74561e-27	0.331191	0.234	0.047	1.02669e-22	MSC_MARCKSL1	HAGHL
3.71327e-27	0.305435	0.197	0.033	1.38854e-22	MSC_MARCKSL1	ETS2
4.68773e-27	1.19546	0.745	0.633	1.75293e-22	MSC_MARCKSL1	H2AFZ
4.90228e-27	0.570816	0.287	0.073	1.83316e-22	MSC_MARCKSL1	EIF5AL1
5.65125e-27	0.35418	0.266	0.061	2.11323e-22	MSC_MARCKSL1	NOP16
1.24805e-26	0.695966	0.33	0.097	4.66697e-22	MSC_MARCKSL1	PREX1
1.77938e-26	0.371261	0.17	0.026	6.6538e-22	MSC_MARCKSL1	HIST1H4H
1.81351e-26	0.72373	0.399	0.135	6.78145e-22	MSC_MARCKSL1	HIST1H1C
1.95662e-26	0.293778	0.17	0.026	7.31659e-22	MSC_MARCKSL1	DUSP2
2.87839e-26	0.471785	0.952	0.954	1.07634e-21	MSC_MARCKSL1	BTF3
2.99184e-26	0.265699	0.191	0.033	1.11877e-21	MSC_MARCKSL1	PACSIN3
5.59409e-26	0.522987	0.335	0.099	2.09186e-21	MSC_MARCKSL1	EXOSC4
5.6961e-26	0.552828	0.952	0.934	2.13e-21	MSC_MARCKSL1	NPM1
6.89963e-26	0.661699	0.931	0.961	2.58005e-21	MSC_MARCKSL1	CFL1
1.89289e-25	0.274073	0.176	0.029	7.07828e-21	MSC_MARCKSL1	HES6
2.16352e-25	0.404124	0.319	0.09	8.09028e-21	MSC_MARCKSL1	PTRH2
2.88727e-25	0.768668	0.516	0.228	1.07967e-20	MSC_MARCKSL1	EIF4EBP1
4.33012e-25	0.588751	0.351	0.113	1.61921e-20	MSC_MARCKSL1	SNRNP25
4.50621e-25	0.266624	0.239	0.052	1.68505e-20	MSC_MARCKSL1	CREB3L4
4.9603e-25	0.725045	0.995	0.998	1.85485e-20	MSC_MARCKSL1	MT-ND1
6.21931e-25	0.568182	0.298	0.083	2.32565e-20	MSC_MARCKSL1	GGH
8.54668e-25	1.41958	0.383	0.137	3.19595e-20	MSC_MARCKSL1	AZGP1
3.11822e-24	0.280033	0.218	0.046	1.16603e-19	MSC_MARCKSL1	CHCHD4
3.45437e-24	0.895323	1	1	1.29173e-19	MSC_MARCKSL1	MT-ND4
5.33336e-24	0.467993	0.298	0.084	1.99435e-19	MSC_MARCKSL1	TUBG1
6.56505e-24	0.648392	0.261	0.065	2.45493e-19	MSC_MARCKSL1	CA2
7.27874e-24	0.366991	0.324	0.096	2.72181e-19	MSC_MARCKSL1	MKNK2
9.65549e-24	0.594121	0.931	0.947	3.61057e-19	MSC_MARCKSL1	CHCHD2
1.67302e-23	0.258111	0.16	0.026	6.25609e-19	MSC_MARCKSL1	SLC25A19
2.52034e-23	0.381232	0.255	0.064	9.42456e-19	MSC_MARCKSL1	CXorf40B
2.88325e-23	0.276693	0.16	0.026	1.07816e-18	MSC_MARCKSL1	SFN
2.96758e-23	0.346019	0.186	0.036	1.1097e-18	MSC_MARCKSL1	WDR4
3.67501e-23	0.577841	0.872	0.859	1.37423e-18	MSC_MARCKSL1	COX6A1
5.19959e-23	0.492327	0.436	0.173	1.94433e-18	MSC_MARCKSL1	NUDT16L1
8.11516e-23	0.456869	0.319	0.099	3.03458e-18	MSC_MARCKSL1	BID
9.85581e-23	0.262073	0.138	0.02	3.68548e-18	MSC_MARCKSL1	MYBL1
1.05763e-22	0.364286	0.415	0.149	3.9549e-18	MSC_MARCKSL1	PRELID3B
1.16569e-22	0.417124	0.973	0.986	4.35896e-18	MSC_MARCKSL1	RPL9
1.25933e-22	0.384052	0.149	0.024	4.70913e-18	MSC_MARCKSL1	RRM2
1.45011e-22	1.22209	0.505	0.245	5.42256e-18	MSC_MARCKSL1	TOB1
1.72474e-22	1.13889	0.957	0.995	6.4495e-18	MSC_MARCKSL1	RPL15
1.99793e-22	0.764767	0.521	0.25	7.47105e-18	MSC_MARCKSL1	CD24
2.04412e-22	0.372787	0.309	0.092	7.64378e-18	MSC_MARCKSL1	TLE3
2.22077e-22	0.288563	0.149	0.024	8.30436e-18	MSC_MARCKSL1	PRR15
2.51178e-22	0.506785	0.973	0.979	9.39255e-18	MSC_MARCKSL1	RPL10A
2.59498e-22	0.400377	0.239	0.06	9.70368e-18	MSC_MARCKSL1	MIF4GD
2.69822e-22	0.319316	0.245	0.06	1.00897e-17	MSC_MARCKSL1	DNALI1
2.83738e-22	0.44823	0.984	0.989	1.06101e-17	MSC_MARCKSL1	NACA
3.31679e-22	0.321459	0.255	0.066	1.24028e-17	MSC_MARCKSL1	ISOC1
3.64082e-22	0.325597	0.202	0.044	1.36145e-17	MSC_MARCKSL1	FAHD2B
4.28721e-22	0.453803	0.351	0.119	1.60316e-17	MSC_MARCKSL1	C16orf91
4.40045e-22	0.599185	0.34	0.119	1.6455e-17	MSC_MARCKSL1	SIAH2
4.87485e-22	0.957119	0.378	0.141	1.8229e-17	MSC_MARCKSL1	MYC
5.51287e-22	0.528735	0.995	0.999	2.06148e-17	MSC_MARCKSL1	EEF1A1
7.39779e-22	0.568064	0.176	0.034	2.76633e-17	MSC_MARCKSL1	RND1
8.12566e-22	1.1145	0.723	0.617	3.03851e-17	MSC_MARCKSL1	RPS17
8.72753e-22	0.818975	0.569	0.33	3.26357e-17	MSC_MARCKSL1	MZT2A
1.36278e-21	0.482664	0.963	0.982	5.09596e-17	MSC_MARCKSL1	RPS13
1.63781e-21	0.321464	0.191	0.04	6.12444e-17	MSC_MARCKSL1	MAP3K1
2.16775e-21	0.285693	0.191	0.04	8.10608e-17	MSC_MARCKSL1	FNBP1L
3.58019e-21	0.415794	0.298	0.092	1.33878e-16	MSC_MARCKSL1	AR
5.7906e-21	0.338455	0.239	0.062	2.16534e-16	MSC_MARCKSL1	SGK3
8.39376e-21	0.252437	0.165	0.031	3.13876e-16	MSC_MARCKSL1	TRIB3
8.39449e-21	0.742615	0.936	0.945	3.13904e-16	MSC_MARCKSL1	EEF1D
9.25335e-21	0.375283	0.319	0.103	3.4602e-16	MSC_MARCKSL1	SLC25A4
9.42302e-21	0.532966	0.207	0.049	3.52364e-16	MSC_MARCKSL1	CITED4
9.73141e-21	0.347048	0.261	0.072	3.63897e-16	MSC_MARCKSL1	PRR7
1.28387e-20	0.298404	0.239	0.062	4.80092e-16	MSC_MARCKSL1	ZC3H12A
1.7146e-20	0.483127	0.436	0.184	6.41158e-16	MSC_MARCKSL1	PARP1
2.13785e-20	0.367215	0.255	0.071	7.99427e-16	MSC_MARCKSL1	PLEKHF2
2.63611e-20	0.2867	0.229	0.058	9.85749e-16	MSC_MARCKSL1	LINC00665
2.65148e-20	0.575016	0.293	0.094	9.91495e-16	MSC_MARCKSL1	RPL39L
3.21353e-20	0.536796	0.968	0.985	1.20167e-15	MSC_MARCKSL1	RPL29
3.81955e-20	0.405789	0.287	0.089	1.42828e-15	MSC_MARCKSL1	POLR3K
3.84615e-20	0.740644	0.324	0.112	1.43823e-15	MSC_MARCKSL1	TACSTD2
4.16403e-20	0.482166	0.984	0.992	1.5571e-15	MSC_MARCKSL1	RPL35
4.8633e-20	0.857667	0.984	0.994	1.81858e-15	MSC_MARCKSL1	RPL19
6.86051e-20	1.0434	0.58	0.356	2.56542e-15	MSC_MARCKSL1	NFKBIA
9.97867e-20	0.288149	0.197	0.045	3.73142e-15	MSC_MARCKSL1	TRIB1
1.06784e-19	0.411612	0.989	0.988	3.99309e-15	MSC_MARCKSL1	RPS9
1.0726e-19	0.49353	0.383	0.15	4.0109e-15	MSC_MARCKSL1	SEC11C
1.18136e-19	0.679942	0.915	0.934	4.41759e-15	MSC_MARCKSL1	SUMO2
1.81627e-19	0.426133	0.973	0.991	6.79175e-15	MSC_MARCKSL1	RPL21
2.09161e-19	0.515983	0.324	0.115	7.82135e-15	MSC_MARCKSL1	HIST1H2AC
2.95605e-19	0.698613	0.915	0.948	1.10539e-14	MSC_MARCKSL1	RPS20
2.99905e-19	0.387753	0.271	0.082	1.12147e-14	MSC_MARCKSL1	ABHD11
3.5519e-19	0.343956	0.186	0.042	1.3282e-14	MSC_MARCKSL1	CKAP2
5.51802e-19	0.323753	0.277	0.085	2.06341e-14	MSC_MARCKSL1	NUDT14
7.51168e-19	0.327667	0.979	0.991	2.80892e-14	MSC_MARCKSL1	RPL7A
8.13662e-19	0.562197	0.457	0.214	3.04261e-14	MSC_MARCKSL1	POLD2
9.06555e-19	0.684975	0.58	0.352	3.38997e-14	MSC_MARCKSL1	LSM4
1.04867e-18	0.382447	0.346	0.128	3.92141e-14	MSC_MARCKSL1	PBX1
1.18317e-18	0.433557	0.963	0.985	4.42434e-14	MSC_MARCKSL1	H3F3A
1.22642e-18	0.283385	0.122	0.02	4.58607e-14	MSC_MARCKSL1	GATA2
1.61575e-18	0.262678	0.191	0.045	6.04193e-14	MSC_MARCKSL1	CXorf40A
1.66695e-18	0.326726	0.255	0.076	6.23338e-14	MSC_MARCKSL1	SLC25A33
4.33821e-18	0.732287	0.5	0.273	1.62223e-13	MSC_MARCKSL1	LAGE3
5.19688e-18	0.602628	0.899	0.928	1.94332e-13	MSC_MARCKSL1	GPX4
6.01113e-18	0.270533	0.149	0.029	2.2478e-13	MSC_MARCKSL1	MZB1
6.57781e-18	0.444179	0.372	0.151	2.45971e-13	MSC_MARCKSL1	GRPEL1
8.39028e-18	0.291301	0.261	0.079	3.13746e-13	MSC_MARCKSL1	NCAPH2
9.06919e-18	0.460509	0.479	0.234	3.39133e-13	MSC_MARCKSL1	TIMM17A
9.9015e-18	0.560624	0.176	0.042	3.70257e-13	MSC_MARCKSL1	ZNF557
1.09892e-17	0.250986	0.207	0.054	4.10931e-13	MSC_MARCKSL1	CDCA4
1.19236e-17	0.423751	0.995	0.995	4.4587e-13	MSC_MARCKSL1	RPL28
1.27173e-17	0.713593	0.989	1	4.7555e-13	MSC_MARCKSL1	MT-CYB
1.36655e-17	0.441655	0.303	0.108	5.11008e-13	MSC_MARCKSL1	CCDC34
1.48124e-17	0.551762	0.314	0.117	5.53896e-13	MSC_MARCKSL1	SQLE
1.51315e-17	0.522456	0.984	0.981	5.65828e-13	MSC_MARCKSL1	RPS11
1.71172e-17	0.343037	0.202	0.053	6.40081e-13	MSC_MARCKSL1	MAP3K8
1.77273e-17	0.52602	0.851	0.88	6.62894e-13	MSC_MARCKSL1	HINT1
1.83017e-17	0.528903	0.553	0.31	6.84373e-13	MSC_MARCKSL1	EZR
1.96323e-17	0.26921	0.186	0.045	7.34131e-13	MSC_MARCKSL1	TUBA4A
2.61474e-17	0.344685	0.282	0.095	9.77754e-13	MSC_MARCKSL1	ALKBH2
4.02853e-17	0.9639	0.271	0.092	1.50643e-12	MSC_MARCKSL1	PEG10
1.17011e-16	0.564641	0.383	0.162	4.37552e-12	MSC_MARCKSL1	PERP
2.99585e-16	0.422957	0.936	0.965	1.12027e-11	MSC_MARCKSL1	RPL27
3.23754e-16	0.880136	0.862	0.896	1.21065e-11	MSC_MARCKSL1	TPI1
3.24802e-16	0.582269	0.867	0.902	1.21456e-11	MSC_MARCKSL1	RPL31
3.40423e-16	0.451685	0.952	0.986	1.27298e-11	MSC_MARCKSL1	RPL14
3.93596e-16	0.303405	0.266	0.089	1.47181e-11	MSC_MARCKSL1	PPP1R16A
4.69135e-16	0.530066	0.894	0.953	1.75428e-11	MSC_MARCKSL1	RPSA
4.91711e-16	0.491507	0.564	0.333	1.8387e-11	MSC_MARCKSL1	HMG20B
5.93469e-16	0.505656	0.862	0.906	2.21922e-11	MSC_MARCKSL1	HNRNPA1
7.39124e-16	0.263253	0.229	0.069	2.76388e-11	MSC_MARCKSL1	NR2C2AP
7.94203e-16	0.275469	0.25	0.08	2.96984e-11	MSC_MARCKSL1	CEBPG
8.12783e-16	0.493787	0.787	0.805	3.03932e-11	MSC_MARCKSL1	PABPC1
8.20878e-16	0.318961	0.266	0.091	3.06959e-11	MSC_MARCKSL1	FAM49B
1.27182e-15	0.259402	0.223	0.067	4.75585e-11	MSC_MARCKSL1	RFC2
1.44955e-15	0.331544	0.968	0.983	5.42046e-11	MSC_MARCKSL1	RPL24
1.62682e-15	0.257327	0.239	0.075	6.08333e-11	MSC_MARCKSL1	MTMR14
2.42775e-15	0.378501	0.309	0.119	9.07833e-11	MSC_MARCKSL1	CA12
2.70162e-15	0.866757	0.606	0.438	1.01024e-10	MSC_MARCKSL1	CYC1
2.81738e-15	0.579479	0.319	0.132	1.05353e-10	MSC_MARCKSL1	MSI2
3.70209e-15	0.748777	0.649	0.546	1.38436e-10	MSC_MARCKSL1	NDUFB9
5.57722e-15	0.280418	0.181	0.049	2.08554e-10	MSC_MARCKSL1	TBC1D9
7.84315e-15	0.668537	0.537	0.333	2.93287e-10	MSC_MARCKSL1	ARL6IP1
7.91452e-15	0.281976	0.266	0.093	2.95956e-10	MSC_MARCKSL1	RRP1
9.01288e-15	0.595431	0.436	0.237	3.37028e-10	MSC_MARCKSL1	DCXR
1.0062e-14	0.404691	0.16	0.04	3.76258e-10	MSC_MARCKSL1	RBP1
1.55734e-14	0.26963	0.213	0.065	5.82352e-10	MSC_MARCKSL1	MRGBP
1.62039e-14	0.288205	0.261	0.091	6.05928e-10	MSC_MARCKSL1	TCTEX1D2
2.23035e-14	0.55577	0.926	0.945	8.34018e-10	MSC_MARCKSL1	PPIA
2.23895e-14	0.253108	0.234	0.076	8.37233e-10	MSC_MARCKSL1	GCAT
2.35342e-14	0.341129	0.346	0.148	8.80038e-10	MSC_MARCKSL1	JUP
2.8769e-14	0.420412	0.431	0.22	1.07579e-09	MSC_MARCKSL1	TAF9
3.38391e-14	0.441084	0.989	0.994	1.26538e-09	MSC_MARCKSL1	RPS24
3.41965e-14	0.425921	0.846	0.891	1.27874e-09	MSC_MARCKSL1	TXN
3.50066e-14	0.312434	0.309	0.122	1.30904e-09	MSC_MARCKSL1	NQO1
5.62621e-14	0.572044	0.431	0.234	2.10386e-09	MSC_MARCKSL1	MRPL12
5.63881e-14	0.640966	0.489	0.296	2.10858e-09	MSC_MARCKSL1	GGCT
6.23955e-14	0.39546	0.92	0.947	2.33322e-09	MSC_MARCKSL1	RPL4
6.46848e-14	0.368289	0.436	0.22	2.41882e-09	MSC_MARCKSL1	HSF1
7.16956e-14	0.40069	0.436	0.226	2.68098e-09	MSC_MARCKSL1	GID8
7.20093e-14	0.331574	0.319	0.133	2.69272e-09	MSC_MARCKSL1	BZW2
7.52105e-14	0.549066	0.809	0.82	2.81242e-09	MSC_MARCKSL1	ATP6V1G1
9.08679e-14	0.941978	0.378	0.755	3.39792e-09	MSC_MARCKSL1	IFI6
9.46025e-14	0.755871	0.665	0.57	3.53757e-09	MSC_MARCKSL1	CYCS
1.3858e-13	0.432277	0.335	0.146	5.18205e-09	MSC_MARCKSL1	REL
1.46158e-13	0.716506	0.761	0.791	5.46543e-09	MSC_MARCKSL1	RAN
1.51912e-13	0.400272	0.388	0.184	5.68061e-09	MSC_MARCKSL1	DCTPP1
1.56332e-13	0.264251	0.271	0.101	5.84589e-09	MSC_MARCKSL1	RAE1
1.80827e-13	0.365529	0.287	0.115	6.76185e-09	MSC_MARCKSL1	SRD5A3
1.83456e-13	0.446128	0.989	0.993	6.86017e-09	MSC_MARCKSL1	UBC
1.88139e-13	0.40704	0.851	0.848	7.03528e-09	MSC_MARCKSL1	UQCRH
1.90172e-13	0.428999	0.952	0.995	7.11131e-09	MSC_MARCKSL1	ACTB
2.19111e-13	0.976945	0.862	0.907	8.19345e-09	MSC_MARCKSL1	COX6C
2.35867e-13	0.324228	0.319	0.137	8.82002e-09	MSC_MARCKSL1	RPS6KB2
2.52467e-13	0.267491	0.191	0.058	9.44074e-09	MSC_MARCKSL1	BRF2
2.60101e-13	0.430224	0.404	0.204	9.72622e-09	MSC_MARCKSL1	THUMPD3-AS1
3.05107e-13	0.628674	0.495	0.312	1.14092e-08	MSC_MARCKSL1	EFHD1
3.07532e-13	0.320811	0.149	0.038	1.14998e-08	MSC_MARCKSL1	S100A1
3.35555e-13	0.3636	0.245	0.089	1.25477e-08	MSC_MARCKSL1	DUSP5
3.6636e-13	0.316206	0.234	0.084	1.36997e-08	MSC_MARCKSL1	CCDC74A
3.83625e-13	0.255745	0.239	0.085	1.43453e-08	MSC_MARCKSL1	HMCES
4.76091e-13	1.044	0.426	0.25	1.78029e-08	MSC_MARCKSL1	UBE2S
5.14187e-13	0.382958	0.372	0.179	1.92275e-08	MSC_MARCKSL1	TOMM40
5.25088e-13	0.334915	0.319	0.138	1.96352e-08	MSC_MARCKSL1	JMJD6
6.37531e-13	0.411813	0.42	0.221	2.38398e-08	MSC_MARCKSL1	FBL
7.2812e-13	0.416871	0.766	0.769	2.72273e-08	MSC_MARCKSL1	SERP1
8.08583e-13	0.358481	0.351	0.162	3.02361e-08	MSC_MARCKSL1	PAICS
8.90456e-13	0.367385	0.399	0.203	3.32977e-08	MSC_MARCKSL1	HAGH
9.77095e-13	0.947751	0.372	0.184	3.65375e-08	MSC_MARCKSL1	IGFBP2
1.0101e-12	0.326149	0.271	0.108	3.77716e-08	MSC_MARCKSL1	LETM1
1.16925e-12	0.271726	0.218	0.074	4.3723e-08	MSC_MARCKSL1	WEE1
1.17615e-12	0.281148	0.25	0.094	4.3981e-08	MSC_MARCKSL1	CDKN2AIPNL
1.18544e-12	0.520541	0.984	0.992	4.43284e-08	MSC_MARCKSL1	RPL36
1.2918e-12	0.647501	0.585	0.451	4.83057e-08	MSC_MARCKSL1	NHP2
1.62661e-12	1.20446	0.559	0.476	6.08255e-08	MSC_MARCKSL1	NME1
1.73792e-12	0.321663	0.229	0.083	6.49878e-08	MSC_MARCKSL1	C17orf58
1.90075e-12	0.576453	0.697	0.624	7.10767e-08	MSC_MARCKSL1	ATP6V0B
2.43672e-12	0.336537	0.33	0.151	9.11186e-08	MSC_MARCKSL1	MPST
2.64557e-12	0.261196	0.229	0.082	9.89285e-08	MSC_MARCKSL1	UBALD1
2.70522e-12	0.309351	0.245	0.092	1.01159e-07	MSC_MARCKSL1	SAC3D1
3.31336e-12	0.30975	0.207	0.071	1.239e-07	MSC_MARCKSL1	UNG
3.34001e-12	0.501334	0.537	0.361	1.24896e-07	MSC_MARCKSL1	LRRC59
3.73389e-12	0.475006	0.973	0.992	1.39625e-07	MSC_MARCKSL1	RPL37A
4.25084e-12	0.749319	0.734	0.833	1.58956e-07	MSC_MARCKSL1	MZT2B
4.6273e-12	0.32043	0.277	0.114	1.73033e-07	MSC_MARCKSL1	RNF139
4.85534e-12	0.796726	0.697	0.635	1.81561e-07	MSC_MARCKSL1	MIF
5.59811e-12	0.424057	0.335	0.159	2.09336e-07	MSC_MARCKSL1	TMPO
6.06185e-12	0.336176	0.34	0.16	2.26677e-07	MSC_MARCKSL1	CYB561
6.56928e-12	0.537445	0.676	0.612	2.45652e-07	MSC_MARCKSL1	SNRPB
7.43003e-12	0.279204	0.229	0.085	2.77838e-07	MSC_MARCKSL1	BCL2L12
8.82257e-12	0.261788	0.266	0.106	3.29911e-07	MSC_MARCKSL1	MBOAT7
9.70312e-12	0.323538	0.367	0.181	3.62838e-07	MSC_MARCKSL1	NELFCD
1.00276e-11	0.381664	0.394	0.208	3.74974e-07	MSC_MARCKSL1	CCDC167
1.19752e-11	0.369972	0.261	0.107	4.47802e-07	MSC_MARCKSL1	MCM7
1.36694e-11	0.734678	0.973	0.999	5.11152e-07	MSC_MARCKSL1	TMSB10
1.41443e-11	0.36628	0.33	0.155	5.28911e-07	MSC_MARCKSL1	DDX39A
1.59234e-11	0.290326	0.324	0.149	5.95439e-07	MSC_MARCKSL1	DRG1
1.65942e-11	0.366984	0.58	0.392	6.20522e-07	MSC_MARCKSL1	PPP4C
1.7533e-11	0.275336	0.255	0.102	6.55627e-07	MSC_MARCKSL1	GUCD1
2.13147e-11	0.265103	0.266	0.109	7.97042e-07	MSC_MARCKSL1	PHGDH
2.19514e-11	0.328789	0.346	0.169	8.2085e-07	MSC_MARCKSL1	PLEKHJ1
2.23144e-11	0.455981	0.426	0.249	8.34425e-07	MSC_MARCKSL1	POP7
2.23512e-11	0.579247	0.819	0.886	8.35799e-07	MSC_MARCKSL1	PSMA7
2.25898e-11	0.987453	0.622	0.588	8.44724e-07	MSC_MARCKSL1	H2AFJ
2.61831e-11	0.26479	0.309	0.138	9.79093e-07	MSC_MARCKSL1	SDHAF2
2.64769e-11	0.644527	0.968	0.995	9.90075e-07	MSC_MARCKSL1	FTL
2.98944e-11	0.446223	0.378	0.199	1.11787e-06	MSC_MARCKSL1	ATP1B1
3.07154e-11	0.708889	0.351	0.169	1.14857e-06	MSC_MARCKSL1	CFD
3.3207e-11	0.616702	0.351	0.184	1.24174e-06	MSC_MARCKSL1	PYCARD
3.76868e-11	0.308635	0.324	0.154	1.40926e-06	MSC_MARCKSL1	COASY
3.85091e-11	0.273284	0.255	0.104	1.44001e-06	MSC_MARCKSL1	ZNF664
3.85675e-11	0.297827	0.266	0.113	1.44219e-06	MSC_MARCKSL1	CDC34
4.11267e-11	0.255529	0.191	0.066	1.53789e-06	MSC_MARCKSL1	ACAT2
4.50448e-11	0.365496	0.91	0.938	1.68441e-06	MSC_MARCKSL1	RPS10
4.8488e-11	0.418708	0.399	0.217	1.81316e-06	MSC_MARCKSL1	RPA3
5.22382e-11	0.483914	0.351	0.184	1.95339e-06	MSC_MARCKSL1	ODC1
5.687e-11	0.317661	0.298	0.137	2.1266e-06	MSC_MARCKSL1	OSER1
6.00773e-11	0.489459	0.484	0.317	2.24653e-06	MSC_MARCKSL1	CHMP4B
6.03261e-11	0.4667	0.452	0.271	2.25583e-06	MSC_MARCKSL1	CD44
6.30766e-11	1.13209	0.362	0.205	2.35869e-06	MSC_MARCKSL1	HMGB2
6.43168e-11	0.389972	0.314	0.149	2.40506e-06	MSC_MARCKSL1	SLC2A1
6.6446e-11	0.27199	0.287	0.127	2.48468e-06	MSC_MARCKSL1	LYPLA2
6.69938e-11	0.313351	0.314	0.149	2.50517e-06	MSC_MARCKSL1	ARFIP2
8.8717e-11	0.388984	0.394	0.215	3.31749e-06	MSC_MARCKSL1	RUVBL2
8.90974e-11	0.318178	0.234	0.093	3.33171e-06	MSC_MARCKSL1	TSPAN1
9.8227e-11	0.414023	0.41	0.234	3.6731e-06	MSC_MARCKSL1	CYTH2
1.03617e-10	0.393294	0.676	0.576	3.87467e-06	MSC_MARCKSL1	RBM8A
1.04559e-10	0.393307	0.585	0.417	3.90988e-06	MSC_MARCKSL1	PPP1CA
1.04973e-10	0.676324	0.394	0.238	3.92537e-06	MSC_MARCKSL1	SLC25A39
1.09331e-10	0.346917	0.378	0.195	4.08834e-06	MSC_MARCKSL1	MRPS6
1.10337e-10	0.306887	0.34	0.167	4.12594e-06	MSC_MARCKSL1	TRABD
1.24985e-10	0.464615	0.367	0.199	4.67368e-06	MSC_MARCKSL1	TMEM106C
1.52613e-10	0.318924	0.335	0.165	5.7068e-06	MSC_MARCKSL1	TGIF1
1.62761e-10	0.257794	0.207	0.079	6.0863e-06	MSC_MARCKSL1	MCCC2
1.86913e-10	0.441059	0.271	0.123	6.98944e-06	MSC_MARCKSL1	SMS
2.32583e-10	0.283957	0.351	0.173	8.69719e-06	MSC_MARCKSL1	PTPRF
2.39698e-10	0.49203	0.766	0.833	8.96326e-06	MSC_MARCKSL1	BRK1
2.56503e-10	0.26106	0.271	0.12	9.59166e-06	MSC_MARCKSL1	RPUSD3
2.57879e-10	0.315321	0.255	0.112	9.64314e-06	MSC_MARCKSL1	PXMP2
2.65519e-10	0.423946	0.309	0.154	9.92883e-06	MSC_MARCKSL1	DUSP4
2.82549e-10	0.550834	0.537	0.391	1.05657e-05	MSC_MARCKSL1	SDF2L1
3.11477e-10	0.459907	0.59	0.461	1.16474e-05	MSC_MARCKSL1	C1orf43
3.19862e-10	0.421094	0.314	0.159	1.19609e-05	MSC_MARCKSL1	MRPL37
3.75663e-10	0.276999	0.319	0.155	1.40475e-05	MSC_MARCKSL1	MRPS18A
4.12791e-10	0.443938	0.399	0.231	1.54359e-05	MSC_MARCKSL1	TMEM134
4.27135e-10	0.306088	0.277	0.126	1.59723e-05	MSC_MARCKSL1	TMEM99
4.35144e-10	0.365239	0.277	0.13	1.62718e-05	MSC_MARCKSL1	MMAB
4.53356e-10	1.10781	0.867	0.941	1.69528e-05	MSC_MARCKSL1	HSPB1
4.68042e-10	0.358137	0.362	0.194	1.7502e-05	MSC_MARCKSL1	SNHG15
5.20022e-10	0.412161	0.489	0.333	1.94457e-05	MSC_MARCKSL1	TOMM22
5.29698e-10	0.509995	0.473	0.327	1.98075e-05	MSC_MARCKSL1	COA3
5.34668e-10	0.535588	0.67	0.669	1.99934e-05	MSC_MARCKSL1	AURKAIP1
5.96797e-10	0.272508	0.229	0.094	2.23166e-05	MSC_MARCKSL1	NIPSNAP1
6.63351e-10	0.304079	0.282	0.131	2.48054e-05	MSC_MARCKSL1	COIL
7.21355e-10	0.422129	0.271	0.125	2.69743e-05	MSC_MARCKSL1	EFNA1
7.25269e-10	0.439839	0.447	0.278	2.71207e-05	MSC_MARCKSL1	EBNA1BP2
7.51608e-10	0.290094	0.293	0.138	2.81056e-05	MSC_MARCKSL1	MRPL10
8.34889e-10	0.254132	0.255	0.112	3.12198e-05	MSC_MARCKSL1	C3orf14
1.05452e-09	0.46958	0.723	0.727	3.94328e-05	MSC_MARCKSL1	ZFAS1
1.12461e-09	0.284063	0.176	0.064	4.20535e-05	MSC_MARCKSL1	MFSD3
1.14477e-09	1.39866	0.436	0.318	4.28076e-05	MSC_MARCKSL1	CRABP2
1.21937e-09	0.305951	0.351	0.187	4.55972e-05	MSC_MARCKSL1	TIMM17B
1.22574e-09	0.408458	0.511	0.352	4.58353e-05	MSC_MARCKSL1	PRR13
1.39167e-09	0.400854	0.383	0.227	5.20401e-05	MSC_MARCKSL1	MTCH2
1.47456e-09	0.251021	0.245	0.107	5.51398e-05	MSC_MARCKSL1	MKKS
1.5586e-09	0.3658	0.441	0.275	5.82822e-05	MSC_MARCKSL1	MIEN1
1.80647e-09	0.93007	0.761	0.799	6.75513e-05	MSC_MARCKSL1	SUB1
1.82544e-09	0.440571	0.835	0.891	6.82604e-05	MSC_MARCKSL1	PFN1
1.95817e-09	0.547205	0.67	0.599	7.32236e-05	MSC_MARCKSL1	RANBP1
2.1939e-09	0.452136	0.59	0.486	8.20388e-05	MSC_MARCKSL1	ENSA
2.25788e-09	0.473989	0.34	0.192	8.44314e-05	MSC_MARCKSL1	PGP
2.39356e-09	0.464151	0.441	0.269	8.95049e-05	MSC_MARCKSL1	CDK2AP2
2.6056e-09	0.614262	0.41	0.252	9.74338e-05	MSC_MARCKSL1	BNIP3
2.67175e-09	0.42344	0.41	0.252	9.99074e-05	MSC_MARCKSL1	CARD19
2.73115e-09	0.267716	0.457	0.271	0.000102129	MSC_MARCKSL1	EIF4E
3.00694e-09	0.427349	0.473	0.325	0.000112442	MSC_MARCKSL1	MRPL55
3.11843e-09	0.480352	0.324	0.178	0.000116611	MSC_MARCKSL1	DTYMK
3.21673e-09	0.538961	0.936	0.961	0.000120286	MSC_MARCKSL1	RPS21
3.50875e-09	0.252384	0.245	0.109	0.000131206	MSC_MARCKSL1	SLC50A1
3.80282e-09	0.338784	0.324	0.17	0.000142203	MSC_MARCKSL1	C19orf48
4.01057e-09	0.341166	0.362	0.203	0.000149971	MSC_MARCKSL1	PSMG3
4.13117e-09	0.292597	0.473	0.289	0.000154481	MSC_MARCKSL1	YTHDF2
4.76701e-09	0.269928	0.335	0.176	0.000178257	MSC_MARCKSL1	HDAC1
5.51822e-09	0.276569	0.973	0.995	0.000206348	MSC_MARCKSL1	RPS23
6.64133e-09	0.337688	0.261	0.126	0.000248346	MSC_MARCKSL1	BOP1
9.06222e-09	0.361135	0.878	0.951	0.000338873	MSC_MARCKSL1	HNRNPA2B1
1.16022e-08	0.30087	0.255	0.12	0.000433852	MSC_MARCKSL1	SYNE2
1.33669e-08	0.574325	0.718	0.773	0.000499843	MSC_MARCKSL1	TMED2
1.40292e-08	0.595978	0.431	0.313	0.000524607	MSC_MARCKSL1	MRPS7
1.41632e-08	0.287506	0.415	0.247	0.000529618	MSC_MARCKSL1	SNRPA1
1.42868e-08	0.277332	0.431	0.26	0.00053424	MSC_MARCKSL1	PCBD1
1.43753e-08	0.587441	0.543	0.436	0.00053755	MSC_MARCKSL1	AGR2
1.52182e-08	0.277616	0.33	0.175	0.000569071	MSC_MARCKSL1	CMC2
1.62749e-08	0.445215	0.468	0.33	0.000608585	MSC_MARCKSL1	C7orf50
1.66174e-08	0.263514	0.255	0.121	0.00062139	MSC_MARCKSL1	NTHL1
1.8522e-08	0.521011	0.543	0.455	0.000692611	MSC_MARCKSL1	MRPS34
1.8569e-08	0.363621	0.574	0.444	0.000694371	MSC_MARCKSL1	RNPS1
1.89651e-08	0.35813	0.441	0.288	0.000709182	MSC_MARCKSL1	PSENEN
1.96478e-08	0.395264	0.415	0.258	0.00073471	MSC_MARCKSL1	PTP4A1
2.07961e-08	0.355974	0.441	0.283	0.000777649	MSC_MARCKSL1	WDR45B
2.25745e-08	0.263261	0.293	0.149	0.000844149	MSC_MARCKSL1	MAD2L2
2.27908e-08	0.51463	0.67	0.629	0.000852239	MSC_MARCKSL1	HSPD1
2.34765e-08	0.568403	0.846	0.934	0.000877881	MSC_MARCKSL1	PRDX1
2.45983e-08	0.25875	0.271	0.134	0.000919828	MSC_MARCKSL1	TFPT
2.55259e-08	0.274257	0.186	0.076	0.000954517	MSC_MARCKSL1	PHF19
2.60746e-08	0.2778	0.351	0.197	0.000975035	MSC_MARCKSL1	PPA2
3.05576e-08	0.325391	0.346	0.198	0.00114267	MSC_MARCKSL1	DCAF13
3.58473e-08	0.279229	0.404	0.247	0.00134047	MSC_MARCKSL1	MRPS12
3.59065e-08	0.28472	0.261	0.128	0.00134269	MSC_MARCKSL1	TRAP1
3.60654e-08	0.295123	0.441	0.284	0.00134863	MSC_MARCKSL1	ARPC5L
3.97911e-08	0.469344	0.383	0.248	0.00148795	MSC_MARCKSL1	MRPS23
4.49984e-08	0.332337	0.383	0.232	0.00168267	MSC_MARCKSL1	MLF1
4.51419e-08	0.416795	0.34	0.2	0.00168804	MSC_MARCKSL1	WDR34
4.83681e-08	0.255745	0.197	0.085	0.00180868	MSC_MARCKSL1	MXD1
5.08083e-08	0.268778	0.255	0.124	0.00189993	MSC_MARCKSL1	ACLY
5.2889e-08	0.766522	0.09	0.286	0.00197773	MSC_MARCKSL1	KRT17
6.35289e-08	0.389499	0.404	0.263	0.0023756	MSC_MARCKSL1	DNAJB9
6.855e-08	0.319366	0.34	0.2	0.00256336	MSC_MARCKSL1	NARF
6.89177e-08	0.279432	0.761	0.79	0.00257711	MSC_MARCKSL1	COX8A
6.95154e-08	0.382165	0.239	0.119	0.00259946	MSC_MARCKSL1	RAD51C
8.24258e-08	0.304495	0.734	0.743	0.00308223	MSC_MARCKSL1	UQCR10
8.3549e-08	0.293146	0.394	0.244	0.00312423	MSC_MARCKSL1	TSEN34
9.60622e-08	0.289298	0.266	0.137	0.00359215	MSC_MARCKSL1	ZFAND2A
9.69716e-08	0.501878	0.574	0.516	0.00362616	MSC_MARCKSL1	TIMM13
9.90689e-08	0.374239	0.378	0.242	0.00370458	MSC_MARCKSL1	SLC52A2
1.06446e-07	0.365846	0.34	0.196	0.00398043	MSC_MARCKSL1	FDFT1
1.06702e-07	0.48287	0.707	0.74	0.00399003	MSC_MARCKSL1	NDUFB10
1.09224e-07	0.376315	0.782	0.837	0.00408432	MSC_MARCKSL1	SOD1
1.16879e-07	0.324499	0.388	0.243	0.00437057	MSC_MARCKSL1	UQCC3
1.23878e-07	0.460913	0.452	0.325	0.00463229	MSC_MARCKSL1	MRPL13
1.44858e-07	0.251983	0.197	0.087	0.00541683	MSC_MARCKSL1	KDM6B
1.46747e-07	0.279309	0.34	0.199	0.00548747	MSC_MARCKSL1	DUSP23
1.50416e-07	0.29847	0.298	0.162	0.00562465	MSC_MARCKSL1	ZDHHC12
1.84229e-07	0.357006	0.543	0.445	0.00688908	MSC_MARCKSL1	MRPL14
1.93137e-07	0.35892	0.314	0.178	0.00722218	MSC_MARCKSL1	HILPDA
2.25197e-07	0.306244	0.362	0.223	0.00842103	MSC_MARCKSL1	ARL8B
2.37254e-07	0.61	0.399	0.281	0.00887187	MSC_MARCKSL1	CHPT1
2.41492e-07	0.30685	0.319	0.183	0.00903035	MSC_MARCKSL1	GAMT
2.54814e-07	0.353014	0.388	0.246	0.0095285	MSC_MARCKSL1	SLBP
2.67632e-07	0.410024	0.596	0.51	0.0100078	MSC_MARCKSL1	POLR2K
2.69522e-07	0.429816	0.41	0.282	0.0100785	MSC_MARCKSL1	MRPL11
2.8478e-07	0.325879	0.527	0.396	0.0106491	MSC_MARCKSL1	UQCRFS1
2.96949e-07	0.354674	0.372	0.231	0.0111041	MSC_MARCKSL1	MAFF
3.52503e-07	0.304317	0.303	0.17	0.0131815	MSC_MARCKSL1	NMRAL1
3.77355e-07	0.300987	0.314	0.178	0.0141108	MSC_MARCKSL1	MAST4
3.86785e-07	0.344363	0.739	0.741	0.0144635	MSC_MARCKSL1	SRSF3
4.14245e-07	0.269577	0.255	0.134	0.0154903	MSC_MARCKSL1	NPM3
4.48259e-07	0.32085	0.665	0.645	0.0167622	MSC_MARCKSL1	UBE2I
4.70535e-07	0.907266	0.351	0.234	0.0175952	MSC_MARCKSL1	S100P
4.84065e-07	0.368891	0.729	0.742	0.0181011	MSC_MARCKSL1	HSPE1
5.78548e-07	0.32826	0.527	0.401	0.0216342	MSC_MARCKSL1	PUF60
5.86803e-07	0.282079	0.394	0.249	0.0219429	MSC_MARCKSL1	EMD
6.0761e-07	0.350637	0.287	0.166	0.022721	MSC_MARCKSL1	MRPS25
6.13113e-07	0.251208	0.154	0.064	0.0229268	MSC_MARCKSL1	ATAD2
6.81894e-07	0.357315	0.314	0.188	0.0254987	MSC_MARCKSL1	EBP
7.29083e-07	0.256544	0.277	0.152	0.0272633	MSC_MARCKSL1	DPH3
7.36623e-07	0.39034	0.314	0.183	0.0275453	MSC_MARCKSL1	SDC4
8.08272e-07	0.27294	0.186	0.085	0.0302245	MSC_MARCKSL1	DHFR
8.524e-07	0.293945	0.654	0.57	0.0318746	MSC_MARCKSL1	H2AFY
8.85645e-07	0.269899	0.346	0.21	0.0331178	MSC_MARCKSL1	WBP2
1.00129e-06	0.259214	0.197	0.092	0.0374423	MSC_MARCKSL1	INSIG1
1.16371e-06	0.394714	0.638	0.608	0.0435159	MSC_MARCKSL1	BCAP31
1.16981e-06	0.376436	0.798	0.877	0.0437438	MSC_MARCKSL1	EEF1B2
1.17273e-06	0.263899	0.229	0.118	0.043853	MSC_MARCKSL1	MLST8
1.17656e-06	0.260114	0.207	0.103	0.0439961	MSC_MARCKSL1	ARMT1
1.19e-06	0.387234	0.25	0.138	0.044499	MSC_MARCKSL1	DUSP14
1.26048e-06	0.39781	0.516	0.421	0.0471344	MSC_MARCKSL1	ADRM1
1.32731e-06	0.25938	0.479	0.339	0.0496333	MSC_MARCKSL1	BUB3
1.47832e-06	0.397135	0.282	0.161	0.0552804	MSC_MARCKSL1	ISG20
1.53703e-06	0.519818	0.644	0.63	0.0574756	MSC_MARCKSL1	LSM3
1.5688e-06	0.260247	0.356	0.221	0.0586638	MSC_MARCKSL1	JAGN1
1.576e-06	0.319876	0.441	0.317	0.0589329	MSC_MARCKSL1	DGCR6L
1.58067e-06	0.298215	0.378	0.247	0.0591074	MSC_MARCKSL1	VBP1
1.76406e-06	0.338219	0.532	0.412	0.0659653	MSC_MARCKSL1	EMC3
1.78403e-06	0.339416	0.335	0.21	0.0667122	MSC_MARCKSL1	STIP1
1.99246e-06	0.405111	0.468	0.336	0.0745061	MSC_MARCKSL1	H1F0
1.99525e-06	0.662789	0.351	0.234	0.0746103	MSC_MARCKSL1	ZNF703
2.05703e-06	0.267986	0.261	0.145	0.0769206	MSC_MARCKSL1	RNFT1
2.59009e-06	0.317274	0.431	0.305	0.0968539	MSC_MARCKSL1	NANS
2.64442e-06	0.255002	0.314	0.187	0.0988854	MSC_MARCKSL1	C1orf35
2.66319e-06	0.313799	0.564	0.459	0.0995873	MSC_MARCKSL1	FAM162A
2.78776e-06	0.468642	0.574	0.531	0.104246	MSC_MARCKSL1	H2AFV
2.80268e-06	0.415033	0.718	0.777	0.104804	MSC_MARCKSL1	ARL6IP4
2.89384e-06	0.433394	0.319	0.202	0.108212	MSC_MARCKSL1	KCNK6
3.02242e-06	0.311298	0.277	0.163	0.11302	MSC_MARCKSL1	NRIP1
3.16062e-06	0.31692	0.378	0.256	0.118188	MSC_MARCKSL1	IMP4
3.29866e-06	0.325865	0.979	1	0.12335	MSC_MARCKSL1	MT-ATP6
3.32264e-06	0.269278	0.894	0.941	0.124247	MSC_MARCKSL1	RPL23
4.19476e-06	0.27559	0.941	0.977	0.156859	MSC_MARCKSL1	HSP90AB1
4.34197e-06	0.385893	0.606	0.59	0.162364	MSC_MARCKSL1	MDH2
4.41133e-06	0.459665	0.681	0.741	0.164957	MSC_MARCKSL1	PRDX2
5.54942e-06	0.294182	0.255	0.145	0.207515	MSC_MARCKSL1	AP1S2
5.61141e-06	0.6207	0.968	0.964	0.209833	MSC_MARCKSL1	RPL38
5.82325e-06	0.344024	0.378	0.263	0.217754	MSC_MARCKSL1	ECI1
5.96225e-06	0.282374	0.41	0.288	0.222952	MSC_MARCKSL1	SLC35B1
6.13599e-06	0.309084	0.314	0.196	0.229449	MSC_MARCKSL1	BLOC1S4
6.53692e-06	0.594202	0.936	0.961	0.244441	MSC_MARCKSL1	RPL27A
6.57482e-06	0.507258	0.654	0.716	0.245859	MSC_MARCKSL1	PRELID1
6.80732e-06	0.352951	0.367	0.248	0.254553	MSC_MARCKSL1	BLVRA
8.21696e-06	0.344081	0.596	0.517	0.307265	MSC_MARCKSL1	TECR
8.73315e-06	0.479723	0.681	0.77	0.326567	MSC_MARCKSL1	HMGN2
9.06339e-06	0.259053	0.282	0.167	0.338917	MSC_MARCKSL1	DKC1
9.46234e-06	0.327961	0.468	0.363	0.353835	MSC_MARCKSL1	SNRPC
9.79248e-06	0.334487	0.372	0.255	0.36618	MSC_MARCKSL1	ZNF593
1.08461e-05	1.00379	0.298	0.195	0.405578	MSC_MARCKSL1	SNHG25
1.09986e-05	0.260859	0.782	0.898	0.411283	MSC_MARCKSL1	GUK1
1.15347e-05	0.835536	0.548	0.502	0.431328	MSC_MARCKSL1	CCND1
1.3758e-05	0.286656	0.362	0.248	0.514467	MSC_MARCKSL1	NOC2L
1.42213e-05	0.364599	0.25	0.149	0.53179	MSC_MARCKSL1	C20orf27
1.59247e-05	0.267724	0.404	0.282	0.595488	MSC_MARCKSL1	MRPL21
1.72888e-05	0.291405	0.319	0.203	0.646497	MSC_MARCKSL1	IDI1
1.79413e-05	0.381738	0.548	0.473	0.670898	MSC_MARCKSL1	SNRPD1
1.83782e-05	0.27249	0.324	0.209	0.687233	MSC_MARCKSL1	LYPLA1
1.98922e-05	0.26807	0.388	0.271	0.743848	MSC_MARCKSL1	NUBP2
2.03944e-05	0.342398	0.394	0.295	0.762627	MSC_MARCKSL1	PMVK
2.05522e-05	0.293435	0.511	0.417	0.768529	MSC_MARCKSL1	RALY
2.08094e-05	0.362423	0.324	0.22	0.778147	MSC_MARCKSL1	PLK2
2.13919e-05	0.289537	0.383	0.268	0.79993	MSC_MARCKSL1	WBP11
2.18899e-05	0.347775	0.383	0.276	0.818552	MSC_MARCKSL1	SLC9A3R2
2.41181e-05	0.621048	0.638	0.714	0.901871	MSC_MARCKSL1	EIF3H
2.48139e-05	0.33554	0.261	0.157	0.92789	MSC_MARCKSL1	ANKRD37
2.48762e-05	0.258789	0.239	0.138	0.930219	MSC_MARCKSL1	RPS6KB1
2.74476e-05	0.526474	0.771	0.938	1	MSC_MARCKSL1	YBX1
3.12764e-05	0.28653	0.207	0.115	1	MSC_MARCKSL1	RGS10
3.22621e-05	0.29152	0.426	0.318	1	MSC_MARCKSL1	MRPL22
3.33194e-05	0.324102	0.649	0.649	1	MSC_MARCKSL1	TPM3
3.51912e-05	0.296727	0.426	0.322	1	MSC_MARCKSL1	EIF4A3
3.61442e-05	0.265682	0.277	0.173	1	MSC_MARCKSL1	MZT1
3.73274e-05	0.307388	0.484	0.394	1	MSC_MARCKSL1	HSD17B10
3.7553e-05	1.2815	0.25	0.162	1	MSC_MARCKSL1	INSR
3.78116e-05	0.28035	0.42	0.315	1	MSC_MARCKSL1	NOSIP
3.80223e-05	0.390353	0.473	0.399	1	MSC_MARCKSL1	MRPS15
3.94577e-05	0.253648	0.303	0.196	1	MSC_MARCKSL1	DDIT3
3.97828e-05	0.444906	0.771	0.915	1	MSC_MARCKSL1	ENO1
4.22271e-05	0.30836	0.457	0.358	1	MSC_MARCKSL1	MRPL42
4.57019e-05	0.259927	0.521	0.419	1	MSC_MARCKSL1	ACP1
4.91264e-05	0.727491	0.388	0.307	1	MSC_MARCKSL1	LAPTM4B
5.24933e-05	0.286763	0.606	0.556	1	MSC_MARCKSL1	COX7A2L
5.88733e-05	0.619798	0.473	0.433	1	MSC_MARCKSL1	NME4
6.01861e-05	0.275485	0.436	0.335	1	MSC_MARCKSL1	MRPS18B
6.29406e-05	0.506648	0.638	0.716	1	MSC_MARCKSL1	ANAPC11
7.09699e-05	0.357842	0.686	0.707	1	MSC_MARCKSL1	SRSF2
7.99161e-05	0.252659	0.287	0.183	1	MSC_MARCKSL1	AHCY
8.09535e-05	0.280811	0.394	0.301	1	MSC_MARCKSL1	GRB2
9.21323e-05	0.363836	0.707	0.791	1	MSC_MARCKSL1	MTDH
9.62379e-05	0.255762	0.516	0.447	1	MSC_MARCKSL1	STRAP
9.75058e-05	0.325203	0.388	0.295	1	MSC_MARCKSL1	PCNA
0.000108837	0.255715	0.277	0.181	1	MSC_MARCKSL1	RARA
0.000118603	0.272841	0.197	0.11	1	MSC_MARCKSL1	HMGCS1
0.000118641	0.389791	0.58	0.597	1	MSC_MARCKSL1	RHOB
0.000131098	0.279585	0.213	0.126	1	MSC_MARCKSL1	ADM
0.000150221	0.28273	0.489	0.426	1	MSC_MARCKSL1	APH1A
0.000158254	0.394829	0.564	0.536	1	MSC_MARCKSL1	CYB5A
0.000190921	0.31125	0.335	0.245	1	MSC_MARCKSL1	COA1
0.000206899	0.25917	0.447	0.359	1	MSC_MARCKSL1	MRPS26
0.000227716	0.355656	0.697	0.769	1	MSC_MARCKSL1	EIF3E
0.000240328	1.25025	0.415	0.365	1	MSC_MARCKSL1	SLC39A6
0.000253032	0.457955	0.729	0.91	1	MSC_MARCKSL1	RAC1
0.000258801	0.276547	0.239	0.152	1	MSC_MARCKSL1	ARHGDIB
0.00026124	0.284492	0.691	0.716	1	MSC_MARCKSL1	PTP4A2
0.000263138	0.402796	0.479	0.418	1	MSC_MARCKSL1	IRX3
0.000281433	0.272841	0.612	0.611	1	MSC_MARCKSL1	CBX3
0.000292519	0.352049	0.606	0.602	1	MSC_MARCKSL1	CALM3
0.000351184	0.315106	0.457	0.386	1	MSC_MARCKSL1	HAX1
0.000359123	0.259128	0.399	0.314	1	MSC_MARCKSL1	LSM10
0.000366054	0.318218	0.463	0.383	1	MSC_MARCKSL1	CXXC5
0.000394214	0.298413	0.234	0.151	1	MSC_MARCKSL1	LYAR
0.000397887	0.284047	0.793	0.874	1	MSC_MARCKSL1	PARK7
0.000405297	0.2746	0.516	0.452	1	MSC_MARCKSL1	RTN3
0.000413811	0.293923	0.484	0.431	1	MSC_MARCKSL1	YWHAH
0.000414045	0.254084	0.436	0.357	1	MSC_MARCKSL1	NELFE
0.000424933	0.337295	0.574	0.563	1	MSC_MARCKSL1	SUMO3
0.000443699	0.427622	0.713	0.802	1	MSC_MARCKSL1	TUBB
0.00047416	0.305615	0.314	0.233	1	MSC_MARCKSL1	DNPH1
0.000485671	0.25491	0.324	0.241	1	MSC_MARCKSL1	PFDN6
0.000487914	0.415906	0.42	0.367	1	MSC_MARCKSL1	LSM1
0.000488928	0.34158	0.649	0.706	1	MSC_MARCKSL1	SRSF9
0.000511597	0.27345	0.973	0.995	1	MSC_MARCKSL1	RPL34
0.000550399	0.76237	0.388	0.336	1	MSC_MARCKSL1	TM4SF1
0.000564198	0.2682	0.957	0.987	1	MSC_MARCKSL1	RPL26
0.000642818	0.250552	0.441	0.358	1	MSC_MARCKSL1	TRIM28
0.000652978	0.529695	0.431	0.368	1	MSC_MARCKSL1	PHLDA2
0.000691547	0.311242	0.452	0.375	1	MSC_MARCKSL1	CARHSP1
0.00073673	0.309757	0.947	0.99	1	MSC_MARCKSL1	RPLP2
0.000841871	0.251759	0.447	0.38	1	MSC_MARCKSL1	C19orf24
0.00090304	0.341849	0.489	0.433	1	MSC_MARCKSL1	ARF6
0.000920918	0.270889	0.532	0.478	1	MSC_MARCKSL1	TMEM14B
0.000936151	0.268114	0.431	0.348	1	MSC_MARCKSL1	DPY30
0.000962843	0.303202	0.388	0.322	1	MSC_MARCKSL1	VPS25
0.000975244	0.638777	0.484	0.497	1	MSC_MARCKSL1	PHB
0.001047	0.25256	0.681	0.738	1	MSC_MARCKSL1	BANF1
0.00112149	0.336658	0.511	0.479	1	MSC_MARCKSL1	POLR2E
0.00113049	0.349239	0.468	0.409	1	MSC_MARCKSL1	CACYBP
0.00115625	0.385103	0.601	0.653	1	MSC_MARCKSL1	PSMB5
0.00118773	0.268103	0.399	0.325	1	MSC_MARCKSL1	PSMD12
0.00120699	0.444399	0.399	0.343	1	MSC_MARCKSL1	PLPP5
0.00126559	0.419423	0.548	0.594	1	MSC_MARCKSL1	TUBB4B
0.00136469	0.270681	0.245	0.166	1	MSC_MARCKSL1	SOX9
0.00149332	0.342833	0.606	0.623	1	MSC_MARCKSL1	PSMA2
0.00158627	0.283362	0.489	0.442	1	MSC_MARCKSL1	GLUL
0.00164734	0.253476	0.665	0.739	1	MSC_MARCKSL1	NDUFS6
0.00169982	0.25938	0.41	0.342	1	MSC_MARCKSL1	CDK4
0.001917	0.320493	0.5	0.477	1	MSC_MARCKSL1	LSM5
0.0020011	0.280392	0.83	0.911	1	MSC_MARCKSL1	SSR4
0.00201153	0.260216	0.25	0.173	1	MSC_MARCKSL1	ANGPTL4
0.0021754	0.537814	0.314	0.27	1	MSC_MARCKSL1	C12orf75
0.00218968	0.333514	0.899	0.99	1	MSC_MARCKSL1	NEAT1
0.00228527	0.255872	0.415	0.354	1	MSC_MARCKSL1	ARPC1A
0.00252207	0.263229	0.293	0.226	1	MSC_MARCKSL1	CD320
0.00293013	0.288178	0.548	0.565	1	MSC_MARCKSL1	MLF2
0.00305173	0.256172	0.34	0.262	1	MSC_MARCKSL1	CDKN1A
0.0031515	0.935061	0.463	0.647	1	MSC_MARCKSL1	ISG15
0.00319796	1.00383	0.324	0.517	1	MSC_MARCKSL1	IFI27
0.0033829	0.358526	0.367	0.325	1	MSC_MARCKSL1	KRT7
0.00350169	0.258062	0.973	0.992	1	MSC_MARCKSL1	ACTG1
0.00387725	0.319205	0.34	0.273	1	MSC_MARCKSL1	FABP5
0.0044825	0.268507	0.601	0.61	1	MSC_MARCKSL1	PSMB2
0.00455453	0.253822	0.596	0.616	1	MSC_MARCKSL1	PSMC5
0.00500789	0.306272	0.277	0.212	1	MSC_MARCKSL1	MGST2
0.00531525	0.317536	0.532	0.553	1	MSC_MARCKSL1	ERGIC3
0.00550289	0.336426	0.521	0.511	1	MSC_MARCKSL1	PSMB7
0.00582591	1.49683	0.691	0.793	1	MSC_MARCKSL1	NDUFA11
0.00658406	0.254471	0.729	0.841	1	MSC_MARCKSL1	NEDD8
0.0069893	0.262923	0.282	0.218	1	MSC_MARCKSL1	ALCAM
0.00734683	0.372675	0.957	0.994	1	MSC_MARCKSL1	RPS12
0.00748019	0.252598	0.649	0.716	1	MSC_MARCKSL1	ENY2
0.00816894	0.271666	0.58	0.567	1	MSC_MARCKSL1	H1FX
0.00942636	0.331765	0.34	0.298	1	MSC_MARCKSL1	CISD3
7.83244e-98	0.61404	0.973	0.656	2.92886e-93	MSC_TAGLN	TAGLN
3.55197e-91	0.303252	0.998	0.936	1.32822e-86	MSC_TAGLN	COL3A1
6.06878e-85	0.614418	0.938	0.624	2.26936e-80	MSC_TAGLN	POSTN
3.16648e-80	0.489272	0.443	0.123	1.18407e-75	MSC_TAGLN	COL14A1
1.98159e-79	0.299379	1	0.945	7.40998e-75	MSC_TAGLN	COL1A1
5.52351e-78	0.572481	0.95	0.635	2.06546e-73	MSC_TAGLN	ASPN
3.96217e-75	0.488732	0.711	0.331	1.48162e-70	MSC_TAGLN	EDIL3
2.00068e-68	0.468118	0.796	0.44	7.48136e-64	MSC_TAGLN	LOXL1
2.16982e-66	0.44375	0.58	0.239	8.11384e-62	MSC_TAGLN	CILP2
8.53981e-64	0.433744	0.968	0.738	3.19338e-59	MSC_TAGLN	COL11A1
4.27279e-55	0.381821	0.853	0.557	1.59777e-50	MSC_TAGLN	ADAMTS2
2.81577e-54	0.334439	0.993	0.852	1.05293e-49	MSC_TAGLN	PRSS23
3.50718e-52	0.331137	0.972	0.797	1.31148e-47	MSC_TAGLN	FSTL1
7.8072e-50	0.359278	0.975	0.807	2.91942e-45	MSC_TAGLN	VCAN
1.75095e-49	0.273034	0.288	0.076	6.5475e-45	MSC_TAGLN	ABI3BP
2.62563e-49	0.351726	0.945	0.714	9.81826e-45	MSC_TAGLN	MXRA5
3.12063e-46	0.364074	0.358	0.124	1.16693e-41	MSC_TAGLN	HAPLN1
2.21191e-45	0.288029	0.973	0.85	8.27123e-41	MSC_TAGLN	COL8A1
1.54312e-44	0.313477	0.962	0.778	5.77033e-40	MSC_TAGLN	ITGBL1
8.33262e-44	0.370237	0.871	0.619	3.1159e-39	MSC_TAGLN	GAS6
1.45824e-43	0.385762	0.565	0.285	5.45296e-39	MSC_TAGLN	PDGFRL
1.74269e-42	0.298047	0.958	0.806	6.51663e-38	MSC_TAGLN	MYL9
3.39856e-42	0.504066	0.614	0.351	1.27086e-37	MSC_TAGLN	ACTA2
7.87464e-42	0.324351	0.774	0.487	2.94464e-37	MSC_TAGLN	PLXDC2
1.06847e-41	0.328834	0.938	0.743	3.99544e-37	MSC_TAGLN	THBS2
1.70175e-41	0.312111	0.972	0.846	6.36352e-37	MSC_TAGLN	COL12A1
2.28215e-39	0.323028	0.926	0.671	8.53386e-35	MSC_TAGLN	THY1
1.82757e-38	0.331261	0.891	0.678	6.83401e-34	MSC_TAGLN	CTHRC1
6.90196e-38	0.279065	0.261	0.079	2.58092e-33	MSC_TAGLN	C1QTNF3
3.13752e-37	0.259546	0.982	0.864	1.17324e-32	MSC_TAGLN	COL5A2
4.17644e-37	0.313771	0.493	0.237	1.56174e-32	MSC_TAGLN	PXDN
1.58295e-36	0.297209	0.503	0.246	5.91927e-32	MSC_TAGLN	NTM
1.10914e-34	0.266728	0.38	0.159	4.14751e-30	MSC_TAGLN	ADGRA2
1.44613e-34	0.311671	0.898	0.681	5.40765e-30	MSC_TAGLN	COL4A2
1.80855e-32	0.256893	0.968	0.829	6.76289e-28	MSC_TAGLN	COL5A1
7.15489e-32	0.269618	0.863	0.631	2.6755e-27	MSC_TAGLN	ECM2
4.27835e-31	0.267293	0.498	0.255	1.59985e-26	MSC_TAGLN	EDNRA
8.96267e-31	0.276579	0.318	0.13	3.3515e-26	MSC_TAGLN	SLC6A6
1.49257e-30	0.340415	0.565	0.333	5.58131e-26	MSC_TAGLN	PTN
2.12142e-30	0.465841	0.425	0.205	7.93283e-26	MSC_TAGLN	CST1
1.90719e-29	0.288001	0.669	0.427	7.13173e-25	MSC_TAGLN	FAM198B
3.10191e-29	0.263557	0.482	0.25	1.15993e-24	MSC_TAGLN	BASP1
3.90326e-29	0.296259	0.923	0.707	1.45958e-24	MSC_TAGLN	PRELP
6.04527e-29	0.257074	0.391	0.184	2.26057e-24	MSC_TAGLN	HMCN1
1.43815e-28	0.290142	0.804	0.565	5.3778e-24	MSC_TAGLN	FNDC1
4.70677e-28	0.304883	0.627	0.389	1.76005e-23	MSC_TAGLN	RARRES2
5.91494e-28	0.267202	0.905	0.694	2.21183e-23	MSC_TAGLN	LRRC15
9.18538e-28	0.28726	0.189	0.056	3.43478e-23	MSC_TAGLN	SFRP2
1.2368e-26	0.271904	0.495	0.277	4.6249e-22	MSC_TAGLN	CCDC3
2.37729e-25	0.270252	0.776	0.537	8.88966e-21	MSC_TAGLN	FMOD
2.65127e-24	0.27656	0.676	0.463	9.91417e-20	MSC_TAGLN	LAMP5
4.13887e-24	0.263664	0.637	0.418	1.54769e-19	MSC_TAGLN	CYGB
3.28982e-22	0.259612	0.856	0.678	1.23019e-17	MSC_TAGLN	COL4A1
3.18586e-21	0.254765	0.769	0.571	1.19132e-16	MSC_TAGLN	CXCL12
3.91943e-20	0.256186	0.798	0.58	1.46563e-15	MSC_TAGLN	MMP2
7.98392e-18	0.271744	0.492	0.319	2.98551e-13	MSC_TAGLN	PAPPA
1.62138e-69	0.671192	0.997	0.646	6.06299e-65	MSC_COL4A1	POSTN
9.58877e-47	0.528588	0.978	0.684	3.58562e-42	MSC_COL4A1	TAGLN
1.80468e-45	0.466202	0.941	0.685	6.74842e-41	MSC_COL4A1	COL4A1
2.00561e-40	0.413776	0.938	0.697	7.49978e-36	MSC_COL4A1	COL4A2
3.41065e-35	0.335313	0.997	0.864	1.27538e-30	MSC_COL4A1	PRSS23
2.65331e-34	0.395093	0.969	0.759	9.9218e-30	MSC_COL4A1	COL11A1
4.31638e-34	0.394002	0.584	0.267	1.61407e-29	MSC_COL4A1	COL26A1
4.45497e-32	0.282664	0.984	0.875	1.66589e-27	MSC_COL4A1	COL5A2
7.85006e-32	0.310263	0.978	0.841	2.93545e-27	MSC_COL4A1	COL5A1
2.57471e-30	0.349987	0.975	0.822	9.62788e-26	MSC_COL4A1	VCAN
2.43582e-29	0.387209	0.766	0.475	9.10852e-25	MSC_COL4A1	LOXL1
1.2687e-26	0.32414	0.956	0.792	4.74418e-22	MSC_COL4A1	COL18A1
3.55348e-26	0.337428	0.956	0.692	1.32879e-21	MSC_COL4A1	THY1
8.75614e-26	0.282657	0.972	0.816	3.27427e-21	MSC_COL4A1	SERPINH1
1.3581e-23	0.358006	0.597	0.324	5.07848e-19	MSC_COL4A1	PAPPA
4.45124e-23	0.335172	0.753	0.474	1.6645e-18	MSC_COL4A1	LAMP5
6.68213e-23	0.494849	0.466	0.221	2.49872e-18	MSC_COL4A1	CST1
9.65986e-23	0.326026	0.922	0.727	3.61221e-18	MSC_COL4A1	PRELP
2.90389e-22	0.355602	0.662	0.398	1.08588e-17	MSC_COL4A1	PPP1R14A
4.15301e-22	0.256852	0.984	0.884	1.55297e-17	MSC_COL4A1	TPM1
5.47055e-22	0.332814	0.794	0.557	2.04566e-17	MSC_COL4A1	FMOD
5.78395e-22	0.271254	0.966	0.794	2.16285e-17	MSC_COL4A1	ITGBL1
1.17604e-21	0.269768	0.963	0.82	4.39768e-17	MSC_COL4A1	MYL9
1.25639e-21	0.318438	0.838	0.604	4.69815e-17	MSC_COL4A1	AQP1
1.92469e-21	0.312767	0.766	0.511	7.1972e-17	MSC_COL4A1	ITGA1
2.36689e-21	0.286499	0.928	0.737	8.85074e-17	MSC_COL4A1	MXRA5
4.50373e-21	0.286517	0.897	0.657	1.68413e-16	MSC_COL4A1	SDC1
5.36467e-21	0.26864	0.416	0.192	2.00606e-16	MSC_COL4A1	MICAL2
8.75523e-21	0.250267	0.963	0.813	3.27393e-16	MSC_COL4A1	FLNA
1.11594e-19	0.28305	0.819	0.587	4.17294e-15	MSC_COL4A1	ADAMTS2
1.46885e-19	0.251632	0.947	0.782	5.49263e-15	MSC_COL4A1	MYH9
2.88726e-19	0.2627	0.934	0.761	1.07966e-14	MSC_COL4A1	ENPP2
7.18919e-19	0.41586	0.594	0.377	2.68832e-14	MSC_COL4A1	ACTA2
3.69719e-18	0.281804	0.681	0.433	1.38253e-13	MSC_COL4A1	ANO1
1.02856e-17	0.259712	0.969	0.797	3.84618e-13	MSC_COL4A1	INHBA
1.38185e-17	0.252986	0.897	0.704	5.16727e-13	MSC_COL4A1	FAP
2.32189e-17	0.271979	0.637	0.389	8.68246e-13	MSC_COL4A1	COL5A3
7.03371e-17	0.278194	0.903	0.696	2.63018e-12	MSC_COL4A1	CTHRC1
1.28105e-16	0.290383	0.691	0.445	4.79035e-12	MSC_COL4A1	MMP11
7.16571e-15	0.260199	0.534	0.31	2.67955e-10	MSC_COL4A1	CRLF1
1.08939e-13	0.29601	0.759	0.567	4.07367e-09	MSC_COL4A1	IGFBP3
1.08792e-255	1.32907	0.996	0.481	4.06818e-251	MSC_SPP1	SPP1
1.07426e-109	0.706044	0.622	0.195	4.01709e-105	MSC_SPP1	WIF1
2.92249e-61	0.497871	0.883	0.657	1.09284e-56	MSC_SPP1	ENPP1
1.80013e-55	0.393804	0.917	0.706	6.73141e-51	MSC_SPP1	SLC29A1
5.93644e-54	0.499055	0.941	0.725	2.21987e-49	MSC_SPP1	IBSP
5.3121e-50	0.334016	0.955	0.824	1.98641e-45	MSC_SPP1	ANKH
4.66886e-45	0.422199	0.633	0.336	1.74587e-40	MSC_SPP1	TP53I11
4.89744e-40	0.256984	0.243	0.064	1.83135e-35	MSC_SPP1	BMP3
2.11503e-38	0.280409	0.957	0.853	7.90894e-34	MSC_SPP1	CLEC11A
6.09637e-38	0.321087	0.583	0.3	2.27968e-33	MSC_SPP1	BMP8B
8.2165e-38	0.326084	0.513	0.249	3.07248e-33	MSC_SPP1	CDH15
3.86511e-32	0.271355	0.415	0.187	1.44532e-27	MSC_SPP1	GPRC5C
1.65368e-30	0.321221	0.61	0.368	6.18376e-26	MSC_SPP1	KLK4
7.62565e-30	0.28033	0.872	0.701	2.85153e-25	MSC_SPP1	TGFB1
2.33002e-28	0.354263	0.529	0.313	8.71288e-24	MSC_SPP1	PTH1R
2.45413e-28	0.282341	0.761	0.541	9.17697e-24	MSC_SPP1	ITGA10
4.60611e-26	0.300891	0.741	0.55	1.72241e-21	MSC_SPP1	MEF2C
8.93975e-26	0.300874	0.844	0.66	3.34293e-21	MSC_SPP1	TNC
5.82573e-25	0.283331	0.651	0.412	2.17847e-20	MSC_SPP1	PGF
2.58374e-24	0.262795	0.5	0.288	9.66165e-20	MSC_SPP1	KCNN4
8.18706e-24	0.280521	0.444	0.244	3.06147e-19	MSC_SPP1	MMP16
9.7371e-22	0.257126	0.54	0.329	3.64109e-17	MSC_SPP1	CSPG4
3.62028e-21	0.275316	0.915	0.867	1.35377e-16	MSC_SPP1	COL10A1
7.28681e-20	0.262017	0.574	0.374	2.72483e-15	MSC_SPP1	SYT12
3.28978e-16	0.263879	0.721	0.535	1.23018e-11	MSC_SPP1	CPE
8.84245e-14	0.351017	0.448	0.303	3.30655e-09	MSC_SPP1	CXCL14
1.19704e-130	0.698731	0.994	0.615	4.4762e-126	MSC_IBSP	ASPN
9.31773e-95	0.567565	0.967	0.748	3.48427e-90	MSC_IBSP	SFRP4
1.34843e-91	0.566614	0.997	0.701	5.04232e-87	MSC_IBSP	IBSP
8.08257e-83	0.52577	0.925	0.656	3.0224e-78	MSC_IBSP	FBLN1
5.8347e-74	0.379667	0.963	0.771	2.18183e-69	MSC_IBSP	CTSK
1.21958e-69	0.484575	0.865	0.557	4.5605e-65	MSC_IBSP	MMP2
9.86244e-66	0.291344	0.996	0.891	3.68796e-61	MSC_IBSP	SERPINF1
8.62797e-60	0.383648	0.976	0.738	3.22634e-55	MSC_IBSP	OMD
9.24306e-48	0.334207	0.88	0.623	3.45635e-43	MSC_IBSP	COLEC12
1.1918e-47	0.324124	0.898	0.651	4.45662e-43	MSC_IBSP	PLEKHA5
7.57522e-46	0.352063	0.789	0.503	2.83268e-41	MSC_IBSP	SRPX
2.05388e-44	0.321824	0.613	0.322	7.68027e-40	MSC_IBSP	ITGB2
2.45761e-44	0.276176	0.979	0.84	9.19e-40	MSC_IBSP	C1R
9.21019e-44	0.319504	0.868	0.637	3.44406e-39	MSC_IBSP	RUNX2
4.715e-43	0.338581	0.561	0.279	1.76313e-38	MSC_IBSP	PDGFRL
1.17688e-42	0.268935	0.973	0.832	4.40083e-38	MSC_IBSP	C1S
1.57758e-41	0.32534	0.9	0.673	5.89922e-37	MSC_IBSP	OLFML2B
6.5696e-41	0.411416	0.529	0.271	2.45664e-36	MSC_IBSP	WISP2
1.50359e-40	0.332183	0.874	0.643	5.62251e-36	MSC_IBSP	SELENOP
5.09817e-40	0.266337	0.985	0.843	1.90641e-35	MSC_IBSP	CFH
1.06581e-39	0.339226	0.665	0.386	3.98549e-35	MSC_IBSP	VCAM1
2.15549e-37	0.286607	0.765	0.516	8.06023e-33	MSC_IBSP	DPYSL3
4.60316e-37	0.314785	0.873	0.645	1.72131e-32	MSC_IBSP	TNC
1.06221e-36	0.304057	0.656	0.384	3.97203e-32	MSC_IBSP	PDGFD
5.10481e-36	0.275204	0.834	0.64	1.90889e-31	MSC_IBSP	SCPEP1
8.55625e-35	0.317992	0.792	0.56	3.19952e-30	MSC_IBSP	CXCL12
1.90369e-33	0.275132	0.915	0.686	7.11866e-29	MSC_IBSP	LRRC15
5.98329e-33	0.273536	0.466	0.236	2.23739e-28	MSC_IBSP	TSPAN11
9.86223e-33	0.350277	0.716	0.474	3.68788e-28	MSC_IBSP	HLA-DRA
1.71458e-32	0.297804	0.862	0.647	6.4115e-28	MSC_IBSP	CYP1B1
1.01397e-31	0.33093	0.692	0.46	3.79165e-27	MSC_IBSP	HLA-DRB1
4.60093e-31	0.255561	0.865	0.652	1.72047e-26	MSC_IBSP	NRP2
1.26134e-30	0.25205	0.851	0.628	4.71666e-26	MSC_IBSP	ECM2
1.65093e-30	0.271921	0.623	0.383	6.17348e-26	MSC_IBSP	RARRES3
2.29395e-30	0.308682	0.619	0.385	8.57798e-26	MSC_IBSP	RARRES2
4.89014e-30	0.273316	0.487	0.263	1.82862e-25	MSC_IBSP	FAM20A
1.17381e-29	0.304367	0.879	0.659	4.38936e-25	MSC_IBSP	CD74
2.04121e-29	0.252722	0.768	0.533	7.6329e-25	MSC_IBSP	ADARB1
4.46701e-29	0.269412	0.429	0.222	1.67039e-24	MSC_IBSP	CD14
4.9617e-29	0.293441	0.65	0.397	1.85538e-24	MSC_IBSP	DPT
6.00177e-29	0.254095	0.652	0.41	2.2443e-24	MSC_IBSP	PTPRD
1.03704e-27	0.278331	0.843	0.617	3.87791e-23	MSC_IBSP	FGF7
3.04915e-27	0.269699	0.592	0.37	1.1402e-22	MSC_IBSP	HLA-DPB1
2.68559e-25	0.251794	0.632	0.413	1.00425e-20	MSC_IBSP	SLC40A1
5.34599e-25	0.277672	0.694	0.488	1.99908e-20	MSC_IBSP	RGS3
5.26672e-23	0.271741	0.242	0.098	1.96944e-18	MSC_IBSP	MMP13
1.18133e-22	0.259256	0.643	0.446	4.41746e-18	MSC_IBSP	HLA-DPA1
3.40362e-20	0.283488	0.468	0.288	1.27275e-15	MSC_IBSP	OGN
1.1051e-19	0.254034	0.717	0.55	4.13239e-15	MSC_IBSP	SOCS3
1.66222e-52	1.26275	1	0.998	6.2157e-48	MSC_KRT18	MT-ATP6
3.97051e-52	1.26934	1	0.998	1.48473e-47	MSC_KRT18	MT-ND1
7.10775e-52	1.14114	1	0.994	2.65787e-47	MSC_KRT18	MT-ND3
2.66341e-51	1.23598	1	0.999	9.95956e-47	MSC_KRT18	MT-CYB
2.73052e-50	1.23854	1	0.999	1.02105e-45	MSC_KRT18	MT-ND2
3.87874e-50	1.20896	1	1	1.45042e-45	MSC_KRT18	MT-ND4
1.37827e-49	1.58221	0.974	0.955	5.15389e-45	MSC_KRT18	MUCL1
4.89082e-49	1.24419	1	0.999	1.82887e-44	MSC_KRT18	MT-CO3
7.29298e-49	1.18175	1	0.999	2.72714e-44	MSC_KRT18	MT-CO2
2.84822e-48	1.07828	1	1	1.06506e-43	MSC_KRT18	MT-CO1
9.95513e-46	0.980021	1	0.993	3.72262e-41	MSC_KRT18	MT-ND5
4.69369e-45	1.05201	1	0.999	1.75516e-40	MSC_KRT18	EEF1A1
1.33993e-37	0.402524	1	1	5.01053e-33	MSC_KRT18	MALAT1
2.79535e-34	0.953216	1	0.983	1.04529e-29	MSC_KRT18	TMSB4X
2.12756e-33	0.772288	1	0.986	7.95581e-29	MSC_KRT18	B2M
3.17919e-33	0.911094	0.855	0.24	1.18882e-28	MSC_KRT18	KRT18
7.13659e-33	0.78871	0.961	0.873	2.66866e-28	MSC_KRT18	COL10A1
6.75127e-31	1.27185	0.789	0.254	2.52457e-26	MSC_KRT18	KRT8
1.33469e-28	1.2865	0.987	0.441	4.99095e-24	MSC_KRT18	KRT19
6.85905e-27	0.9016	1	0.992	2.56487e-22	MSC_KRT18	ACTB
2.52699e-26	0.934499	1	0.957	9.44944e-22	MSC_KRT18	MGP
2.88061e-26	0.863519	1	0.999	1.07718e-21	MSC_KRT18	FTH1
7.80016e-25	0.849877	1	0.999	2.91679e-20	MSC_KRT18	RPL10
1.3257e-23	0.443469	0.934	0.962	4.95733e-19	MSC_KRT18	COL1A2
2.22912e-23	0.287311	0.868	0.968	8.33557e-19	MSC_KRT18	VIM
2.3463e-22	0.815691	1	0.994	8.77374e-18	MSC_KRT18	TPT1
1.47539e-21	0.472369	0.908	0.963	5.51706e-17	MSC_KRT18	FN1
4.33733e-21	0.812194	1	0.999	1.6219e-16	MSC_KRT18	RPS18
2.68986e-19	0.317788	0.868	0.961	1.00585e-14	MSC_KRT18	LUM
3.66574e-19	0.893062	1	0.989	1.37077e-14	MSC_KRT18	RPL12
4.01494e-19	0.724052	1	0.998	1.50135e-14	MSC_KRT18	TMSB10
7.29213e-19	0.447634	0.882	0.949	2.72682e-14	MSC_KRT18	COL3A1
2.72621e-17	0.728918	1	0.992	1.01944e-12	MSC_KRT18	RPS12
6.58328e-17	0.765146	1	0.998	2.46175e-12	MSC_KRT18	RPLP1
1.84297e-16	0.609015	1	0.981	6.8916e-12	MSC_KRT18	S100A6
4.81779e-16	0.719256	1	0.999	1.80156e-11	MSC_KRT18	RPL41
6.63658e-16	0.774635	1	0.995	2.48168e-11	MSC_KRT18	RPS4X
2.26787e-14	1.05005	0.934	0.645	8.48046e-10	MSC_KRT18	XBP1
3.18842e-14	0.744014	1	0.997	1.19228e-09	MSC_KRT18	RPL32
3.31612e-14	0.684034	1	0.999	1.24003e-09	MSC_KRT18	RPL13
1.3021e-13	0.763556	1	0.99	4.86907e-09	MSC_KRT18	RPL7A
5.25562e-13	0.747453	1	0.998	1.96529e-08	MSC_KRT18	RPL3
6.13849e-12	0.783132	1	0.996	2.29543e-07	MSC_KRT18	RPS14
9.50767e-12	0.731959	1	0.996	3.5553e-07	MSC_KRT18	RPS2
1.3767e-11	0.703546	1	0.996	5.14802e-07	MSC_KRT18	RPL11
4.8792e-11	0.281114	0.763	0.952	1.82453e-06	MSC_KRT18	SPARC
6.3229e-10	0.767013	1	0.99	2.36439e-05	MSC_KRT18	RPS3A
1.65061e-09	0.289292	0.829	0.958	6.17231e-05	MSC_KRT18	COL1A1
2.90612e-09	0.633988	0.987	0.973	0.000108671	MSC_KRT18	S100A11
8.64783e-09	0.648655	1	0.993	0.000323377	MSC_KRT18	GAPDH
1.07104e-08	0.601242	1	0.994	0.000400506	MSC_KRT18	RPL34
6.23705e-08	0.633697	1	0.993	0.00233228	MSC_KRT18	RPL15
7.52956e-08	0.643277	0.987	0.984	0.0028156	MSC_KRT18	NEAT1
8.32331e-08	0.633969	1	0.997	0.00311242	MSC_KRT18	SERF2
1.49565e-07	0.717275	1	0.991	0.00559284	MSC_KRT18	RPL6
1.99458e-07	0.416416	0.842	0.97	0.00745853	MSC_KRT18	HLA-B
2.36619e-07	1.26785	0.526	0.44	0.00884814	MSC_KRT18	AGR2
4.02627e-07	1.17502	0.461	0.325	0.0150558	MSC_KRT18	KRT7
9.73808e-07	0.58312	1	0.991	0.0364146	MSC_KRT18	ACTG1
1.08765e-06	0.842787	0.908	0.888	0.0406714	MSC_KRT18	TXN
1.41751e-06	0.512731	0.105	0.022	0.0530065	MSC_KRT18	KRT6A
1.55086e-06	0.604605	1	0.994	0.057993	MSC_KRT18	RPS24
2.1274e-06	0.652432	1	0.989	0.0795521	MSC_KRT18	MYL6
3.59397e-06	0.885856	0.395	0.215	0.134393	MSC_KRT18	CLDN4
4.80973e-06	0.951666	0.553	0.55	0.179855	MSC_KRT18	SCGB2A2
6.94007e-06	0.262256	0.237	0.648	0.259517	MSC_KRT18	H2AFZ
1.02888e-05	0.266444	0.697	0.962	0.384739	MSC_KRT18	TIMP1
1.1676e-05	0.259219	0.329	0.862	0.436613	MSC_KRT18	COX5B
1.63787e-05	0.650565	1	0.991	0.612465	MSC_KRT18	RPS8
1.89944e-05	0.362616	0.645	0.953	0.710275	MSC_KRT18	RACK1
2.28693e-05	0.534469	1	0.992	0.855173	MSC_KRT18	RPS27
2.80977e-05	0.28177	0.276	0.725	1	MSC_KRT18	HMGN1
2.94042e-05	0.674358	1	0.992	1	MSC_KRT18	UBC
4.79797e-05	0.363594	0.632	0.945	1	MSC_KRT18	MT-ND4L
6.56522e-05	0.536113	1	0.993	1	MSC_KRT18	RPL19
6.82698e-05	0.617106	1	0.984	1	MSC_KRT18	RPL29
7.60192e-05	0.549262	1	0.998	1	MSC_KRT18	PTMA
8.5264e-05	0.573626	1	0.996	1	MSC_KRT18	RPS15
0.000162686	0.69473	0.211	0.098	1	MSC_KRT18	S100A9
0.000183355	0.281656	0.263	0.659	1	MSC_KRT18	HNRNPH1
0.000197008	0.675353	1	0.99	1	MSC_KRT18	RPL18A
0.000203931	0.283307	0.474	0.895	1	MSC_KRT18	ARPC3
0.000239627	0.639398	0.211	0.1	1	MSC_KRT18	PEG10
0.000271607	0.849268	0.342	0.238	1	MSC_KRT18	CALML5
0.000350851	0.602023	1	0.991	1	MSC_KRT18	RPL35A
0.00040731	0.254385	0.961	0.959	1	MSC_KRT18	RPL27A
0.000427856	0.474213	1	0.993	1	MSC_KRT18	FTL
0.000455935	0.988953	0.355	0.263	1	MSC_KRT18	CD24
0.000475231	0.286464	0.342	0.838	1	MSC_KRT18	SET
0.000550617	0.736725	1	0.975	1	MSC_KRT18	RPL7
0.00079323	0.882426	0.592	0.79	1	MSC_KRT18	SAT1
0.000874836	0.490902	1	0.994	1	MSC_KRT18	RPS23
0.000965377	0.654972	1	0.992	1	MSC_KRT18	RPL18
0.00108945	0.554844	0.961	0.983	1	MSC_KRT18	RPL37
0.00133691	0.632018	1	0.98	1	MSC_KRT18	RPS13
0.00134229	0.250477	0.474	0.812	1	MSC_KRT18	PABPC1
0.00174452	0.282978	0.961	0.96	1	MSC_KRT18	CALM2
0.00179746	0.257317	0.184	0.448	1	MSC_KRT18	MXD4
0.00227009	0.564758	1	0.992	1	MSC_KRT18	RPS3
0.00263338	0.51098	0.158	0.076	1	MSC_KRT18	C2CD4B
0.00277039	0.617387	1	0.994	1	MSC_KRT18	RPL13A
0.00325884	0.390643	0.342	0.778	1	MSC_KRT18	SERP1
0.00343079	0.552523	0.197	0.109	1	MSC_KRT18	MMP9
0.00355894	0.537677	1	0.989	1	MSC_KRT18	RPL30
0.00395204	0.88033	0.263	0.177	1	MSC_KRT18	ELF3
0.00415755	0.649107	1	0.985	1	MSC_KRT18	RPL9
0.00428316	0.525766	1	0.991	1	MSC_KRT18	RPS27A
0.00625546	0.323565	0.921	0.976	1	MSC_KRT18	CST3
0.00702297	0.266732	0.934	0.936	1	MSC_KRT18	RPS10
0.00714306	0.59148	0.974	0.975	1	MSC_KRT18	HSP90AB1
0.00720879	0.544075	1	0.994	1	MSC_KRT18	RPL8
0.00737896	0.520842	1	0.99	1	MSC_KRT18	RPS6
0.0084343	0.822127	0.289	0.224	1	MSC_KRT18	PLK2
0.00855158	0.444492	1	0.979	1	MSC_KRT18	RPL39
0.0088544	0.300797	0.961	0.978	1	MSC_KRT18	LGALS1
0.00922784	0.358683	0.974	0.984	1	MSC_KRT18	CD63
0.00983581	0.27398	0.737	0.923	1	MSC_KRT18	SKP1
8.6711e-77	0.573938	0.987	0.848	3.24247e-72	MSC_ASPN	COMP
4.53264e-54	0.504875	0.97	0.865	1.69493e-49	MSC_ASPN	COL10A1
2.25168e-33	0.375886	0.923	0.803	8.41995e-29	MSC_ASPN	INHBA
6.57507e-32	0.268794	0.97	0.935	2.45868e-27	MSC_ASPN	MT-ND4L
3.04177e-30	0.416581	0.863	0.734	1.13744e-25	MSC_ASPN	PRELP
2.33557e-24	0.563968	0.565	0.304	8.73365e-20	MSC_ASPN	CXCL14
2.34245e-20	0.284361	0.946	0.861	8.75937e-16	MSC_ASPN	COL12A1
2.32104e-18	0.351088	0.799	0.606	8.6793e-14	MSC_ASPN	CRTAC1
3.54134e-17	0.256424	0.89	0.839	1.32425e-12	MSC_ASPN	NBL1
6.45035e-17	0.336921	0.666	0.461	2.41204e-12	MSC_ASPN	PTGES
2.58924e-15	0.323112	0.729	0.559	9.6822e-11	MSC_ASPN	SUGCT
2.97573e-14	0.32229	0.716	0.534	1.11275e-09	MSC_ASPN	SCGB2A2
8.3284e-14	0.303778	0.508	0.314	3.11432e-09	MSC_ASPN	CRLF1
2.09468e-13	0.299077	0.756	0.547	7.83286e-09	MSC_ASPN	CPE
3.00741e-12	0.29396	0.716	0.566	1.12459e-07	MSC_ASPN	FMOD
3.84548e-12	0.292366	0.89	0.671	1.43798e-07	MSC_ASPN	ASPN
4.17329e-12	0.266539	0.756	0.652	1.56056e-07	MSC_ASPN	CKB
4.21849e-74	0.784283	0.849	0.53	1.57746e-69	MSC_COL10A1	CPE
1.18331e-65	0.604636	0.452	0.123	4.42487e-61	MSC_COL10A1	EGLN3
7.74412e-58	0.40347	0.394	0.099	2.89584e-53	MSC_COL10A1	MIR210HG
2.9649e-57	0.675349	0.669	0.31	1.10869e-52	MSC_COL10A1	VEGFA
8.87857e-51	0.528263	0.757	0.444	3.32005e-46	MSC_COL10A1	PTGES
1.97995e-42	0.354998	0.95	0.901	7.40381e-38	MSC_COL10A1	ENO1
1.96254e-38	0.375201	0.418	0.152	7.33873e-34	MSC_COL10A1	ENO2
9.12134e-38	0.430212	0.828	0.713	3.41083e-33	MSC_COL10A1	PGK1
1.62837e-32	0.521824	0.484	0.223	6.08913e-28	MSC_COL10A1	NDUFA4L2
3.48359e-32	0.368536	0.804	0.618	1.30265e-27	MSC_COL10A1	MIF
9.17597e-32	0.42952	0.5	0.249	3.43126e-27	MSC_COL10A1	CAV1
8.89984e-30	0.347769	0.873	0.789	3.32801e-25	MSC_COL10A1	BTG1
1.52963e-29	0.294786	0.921	0.846	5.71989e-25	MSC_COL10A1	CD9
8.06485e-29	0.408242	0.307	0.108	3.01577e-24	MSC_COL10A1	ADM
1.69008e-28	0.33065	0.918	0.822	6.31989e-24	MSC_COL10A1	TGFBI
5.45483e-28	0.292757	0.317	0.114	2.03978e-23	MSC_COL10A1	NTRK3
9.67822e-27	0.348134	0.786	0.639	3.61907e-22	MSC_COL10A1	NDRG1
3.41728e-26	0.315807	0.968	0.863	1.27786e-21	MSC_COL10A1	COL10A1
3.61627e-26	0.279822	0.937	0.893	1.35227e-21	MSC_COL10A1	SERPINE2
4.43031e-25	0.372738	0.659	0.44	1.65667e-20	MSC_COL10A1	FAM162A
2.92301e-24	0.29025	0.331	0.134	1.09303e-19	MSC_COL10A1	GBE1
9.03535e-24	0.351957	0.751	0.614	3.37868e-19	MSC_COL10A1	C9orf3
9.25764e-24	0.366564	0.725	0.559	3.4618e-19	MSC_COL10A1	P4HA1
4.95604e-23	0.267141	0.315	0.127	1.85326e-18	MSC_COL10A1	ALDOC
2.35611e-20	0.255297	0.32	0.138	8.81045e-16	MSC_COL10A1	SLC2A1
3.90281e-19	0.297927	0.746	0.631	1.45942e-14	MSC_COL10A1	BHLHE40
5.18975e-19	0.341398	0.413	0.225	1.94066e-14	MSC_COL10A1	ARRDC3
6.05281e-19	0.307629	0.524	0.323	2.26339e-14	MSC_COL10A1	NOL3
5.73875e-18	0.286707	0.804	0.725	2.14595e-13	MSC_COL10A1	WSB1
2.16238e-17	0.29035	0.802	0.709	8.086e-13	MSC_COL10A1	CRYAB
2.51283e-16	0.289023	0.481	0.296	9.39647e-12	MSC_COL10A1	NKD2
8.96892e-16	0.304881	0.413	0.242	3.35384e-11	MSC_COL10A1	BNIP3
1.21178e-15	0.363903	0.616	0.468	4.53134e-11	MSC_COL10A1	DDIT4
3.66939e-15	0.255091	0.804	0.703	1.37213e-10	MSC_COL10A1	PLOD2
3.91819e-15	0.292684	0.608	0.432	1.46517e-10	MSC_COL10A1	PGF
2.30673e-14	0.318632	0.317	0.169	8.62579e-10	MSC_COL10A1	HILPDA
2.31091e-14	0.261201	0.5	0.322	8.64142e-10	MSC_COL10A1	FGF1
2.48223e-14	0.254082	0.709	0.6	9.28205e-10	MSC_COL10A1	BNIP3L
2.79402e-14	0.281225	0.672	0.548	1.0448e-09	MSC_COL10A1	MEF2A
4.8303e-14	0.315158	0.632	0.492	1.80624e-09	MSC_COL10A1	ID1
1.60958e-12	0.257789	0.553	0.389	6.01886e-08	MSC_COL10A1	SYT12
9.3146e-11	0.279067	0.479	0.335	3.4831e-06	MSC_COL10A1	SERPINE1
1.13579e-10	0.252211	0.23	0.118	4.24717e-06	MSC_COL10A1	SLC5A3
1.44028e-09	0.268511	0.635	0.539	5.38578e-05	MSC_COL10A1	SCGB2A2
8.54319e-45	0.439869	0.504	0.148	3.19464e-40	MSC_POSTN	CCDC102B
6.91732e-37	0.510772	0.748	0.387	2.58666e-32	MSC_POSTN	COL5A3
7.77205e-36	0.481478	0.38	0.109	2.90628e-31	MSC_POSTN	MCAM
5.89514e-34	0.500067	0.906	0.703	2.20443e-29	MSC_POSTN	THY1
5.94553e-31	0.318063	0.222	0.044	2.22327e-26	MSC_POSTN	ABCC9
1.49843e-30	0.399333	0.974	0.796	5.60323e-26	MSC_POSTN	COL18A1
3.04576e-29	0.447808	0.607	0.273	1.13893e-24	MSC_POSTN	S1PR3
3.57334e-27	0.480721	0.949	0.66	1.33622e-22	MSC_POSTN	POSTN
1.01607e-24	0.364726	0.906	0.641	3.79948e-20	MSC_POSTN	GGT5
8.13223e-22	0.358904	0.94	0.703	3.04097e-17	MSC_POSTN	COL4A2
1.56592e-21	0.375245	0.906	0.695	5.85558e-17	MSC_POSTN	COL4A1
3.8669e-21	0.267639	0.359	0.131	1.44599e-16	MSC_POSTN	NRP1
7.86837e-21	0.3328	0.338	0.123	2.9423e-16	MSC_POSTN	GRP
8.57794e-21	0.404869	0.752	0.482	3.20763e-16	MSC_POSTN	C11orf96
1.52022e-20	0.280249	0.359	0.135	5.68471e-16	MSC_POSTN	GUCY1B1
1.70702e-20	0.374033	0.543	0.28	6.38322e-16	MSC_POSTN	EDNRA
2.57803e-20	0.281532	0.265	0.083	9.64027e-16	MSC_POSTN	AGT
3.68623e-20	0.392235	0.688	0.44	1.37843e-15	MSC_POSTN	CYGB
2.12555e-19	0.322785	0.726	0.442	7.94829e-15	MSC_POSTN	LAMC1
2.67561e-19	0.256931	0.342	0.128	1.00052e-14	MSC_POSTN	SFTA1P
5.60985e-19	0.290899	0.513	0.248	2.09775e-14	MSC_POSTN	MARCKSL1
6.93311e-19	0.326677	0.491	0.24	2.59257e-14	MSC_POSTN	RNF152
1.14721e-18	0.275875	0.359	0.142	4.28986e-14	MSC_POSTN	ARHGDIB
1.24442e-18	0.308578	0.936	0.829	4.65339e-14	MSC_POSTN	UACA
1.97352e-16	0.288218	0.547	0.292	7.37977e-12	MSC_POSTN	ENPEP
4.13184e-16	0.305717	0.889	0.706	1.54506e-11	MSC_POSTN	OLFML2B
4.94588e-16	0.269419	0.466	0.23	1.84946e-11	MSC_POSTN	PLXND1
5.52242e-16	0.269675	0.444	0.214	2.06505e-11	MSC_POSTN	GPM6B
9.14528e-16	0.296758	0.573	0.323	3.41979e-11	MSC_POSTN	SNAI2
9.33913e-16	0.267928	0.897	0.725	3.49227e-11	MSC_POSTN	LAMA4
1.64858e-15	0.274809	0.923	0.765	6.16472e-11	MSC_POSTN	PDGFRB
1.85368e-15	0.333925	0.692	0.434	6.93167e-11	MSC_POSTN	PGF
1.85988e-15	0.323357	0.415	0.207	6.95482e-11	MSC_POSTN	PLXDC1
2.58733e-15	0.272802	0.457	0.23	9.67507e-11	MSC_POSTN	ETS1
4.75518e-15	0.265705	0.5	0.263	1.77815e-10	MSC_POSTN	PRKG1
5.60874e-15	0.277114	0.714	0.457	2.09733e-10	MSC_POSTN	EPAS1
5.91385e-15	0.266905	0.368	0.166	2.21142e-10	MSC_POSTN	CD248
8.99163e-15	0.29559	0.744	0.517	3.36233e-10	MSC_POSTN	TNFAIP6
1.08764e-14	0.259344	0.897	0.711	4.06712e-10	MSC_POSTN	TFPI
1.43228e-14	0.267877	0.56	0.314	5.35585e-10	MSC_POSTN	ENTPD1
1.5079e-14	0.305124	0.551	0.312	5.63862e-10	MSC_POSTN	SMOC1
4.17541e-14	0.263975	0.363	0.167	1.56135e-09	MSC_POSTN	KCNK17
1.02604e-13	0.273224	0.355	0.165	3.83676e-09	MSC_POSTN	CARMN
3.18287e-13	0.305928	0.718	0.521	1.1902e-08	MSC_POSTN	ITGA1
3.6948e-13	0.386898	0.436	0.239	1.38164e-08	MSC_POSTN	NDUFA4L2
6.40536e-13	0.302379	0.521	0.311	2.39522e-08	MSC_POSTN	OLFML2A
7.76721e-13	0.387953	0.748	0.551	2.90447e-08	MSC_POSTN	APOE
1.02864e-12	0.255214	0.756	0.525	3.8465e-08	MSC_POSTN	MDK
7.43616e-12	0.250468	0.654	0.442	2.78068e-07	MSC_POSTN	MYO1B
1.85024e-11	0.25218	0.679	0.47	6.91879e-07	MSC_POSTN	JAG1
2.01177e-11	0.25132	0.402	0.217	7.5228e-07	MSC_POSTN	NR2F2
3.93202e-11	0.275405	0.402	0.222	1.47034e-06	MSC_POSTN	APCDD1
1.58367e-10	0.268061	0.526	0.338	5.92199e-06	MSC_POSTN	TGFB3
4.75105e-09	0.25344	0.906	0.749	0.000177661	MSC_POSTN	IBSP
8.40374e-05	0.26345	0.205	0.121	1	MSC_POSTN	MMP13
0	1.64371	0.78	0.004	0	MSC_MGST1	TNXB
0	1.64026	0.78	0.007	0	MSC_MGST1	C3
0	1.40542	0.634	0.002	0	MSC_MGST1	PI16
0	1.11427	0.634	0.003	0	MSC_MGST1	CILP
0	1.06654	0.488	0.001	0	MSC_MGST1	PRG4
0	0.851467	0.463	0	0	MSC_MGST1	ADH1B
0	0.771731	0.512	0	0	MSC_MGST1	F10
0	0.729476	0.585	0	0	MSC_MGST1	HMCN2
0	0.705063	0.537	0.001	0	MSC_MGST1	CHRDL1
6.97464e-284	0.72687	0.488	0.002	2.6081e-279	MSC_MGST1	PCSK6
2.01161e-280	0.881705	0.659	0.006	7.52221e-276	MSC_MGST1	LRRN4CL
8.33815e-279	0.61452	0.512	0.002	3.11797e-274	MSC_MGST1	ALDH1A1
1.2857e-276	0.682934	0.537	0.003	4.80776e-272	MSC_MGST1	PKDCC
1.46972e-264	1.91678	0.756	0.01	5.49587e-260	MSC_MGST1	PLA2G2A
1.74158e-256	0.523353	0.415	0.001	6.51247e-252	MSC_MGST1	VEGFD
6.18859e-245	1.60913	0.805	0.014	2.31416e-240	MSC_MGST1	MFAP4
6.49661e-237	0.986516	0.756	0.012	2.42934e-232	MSC_MGST1	CD34
7.05486e-214	0.397335	0.293	0	2.63809e-209	MSC_MGST1	XPNPEP2
3.60109e-196	0.475338	0.268	0	1.34659e-191	MSC_MGST1	CPB1
2.59751e-186	0.760039	0.561	0.008	9.71314e-182	MSC_MGST1	LAMA2
4.21788e-181	0.472298	0.366	0.002	1.57724e-176	MSC_MGST1	LVRN
1.79797e-178	0.314873	0.244	0	6.72332e-174	MSC_MGST1	FREM1
7.3659e-177	1.00534	0.732	0.017	2.75441e-172	MSC_MGST1	NOVA1
2.71911e-167	1.19134	0.756	0.021	1.01678e-162	MSC_MGST1	ITM2A
1.14241e-165	0.342018	0.268	0.001	4.27191e-161	MSC_MGST1	PXDNL
1.32177e-165	0.396032	0.268	0.001	4.94263e-161	MSC_MGST1	SH2D1A
2.38088e-163	0.609762	0.488	0.007	8.90306e-159	MSC_MGST1	ABCA9
8.27941e-160	0.36863	0.293	0.001	3.096e-155	MSC_MGST1	ARHGAP20
1.58798e-159	1.07619	0.707	0.019	5.93808e-155	MSC_MGST1	MEG3
1.02276e-155	0.608036	0.488	0.008	3.82452e-151	MSC_MGST1	FILIP1
1.98651e-148	0.314004	0.244	0.001	7.42835e-144	MSC_MGST1	IL33
1.97797e-145	0.992914	0.634	0.017	7.39641e-141	MSC_MGST1	CLEC3B
1.38569e-144	0.369934	0.22	0	5.18166e-140	MSC_MGST1	CYP4B1
3.58235e-141	1.09273	0.756	0.027	1.33958e-136	MSC_MGST1	ABCA8
1.03852e-139	1.18944	0.537	0.012	3.88345e-135	MSC_MGST1	THBS4
6.25001e-133	0.488737	0.415	0.006	2.33713e-128	MSC_MGST1	EPB41L3
4.52047e-127	0.256723	0.195	0	1.69039e-122	MSC_MGST1	FAM180B
4.21074e-119	0.732273	0.61	0.02	1.57456e-114	MSC_MGST1	RAMP2
6.11422e-115	0.515125	0.39	0.007	2.28635e-110	MSC_MGST1	ADAMTSL3
1.18673e-110	0.282396	0.22	0.001	4.43764e-106	MSC_MGST1	NPR1
1.41133e-104	0.679695	0.561	0.019	5.27753e-100	MSC_MGST1	EBF2
1.49854e-102	1.59348	0.805	0.049	5.60365e-98	MSC_MGST1	EFEMP1
2.58566e-102	0.41557	0.317	0.005	9.66882e-98	MSC_MGST1	GRK5
9.38232e-99	0.464077	0.317	0.005	3.50843e-94	MSC_MGST1	CLEC14A
1.8227e-95	0.389098	0.317	0.005	6.81582e-91	MSC_MGST1	DPP4
4.61462e-93	0.310965	0.244	0.003	1.72559e-88	MSC_MGST1	ADAM33
1.12664e-87	0.463214	0.341	0.008	4.21296e-83	MSC_MGST1	LINC01133
1.54898e-84	0.366894	0.22	0.002	5.79227e-80	MSC_MGST1	DEFB1
2.77166e-84	0.387801	0.317	0.007	1.03643e-79	MSC_MGST1	CNTN4
9.596e-84	1.0676	0.707	0.045	3.58833e-79	MSC_MGST1	TGFBR3
1.04628e-83	1.30035	0.707	0.045	3.91244e-79	MSC_MGST1	PCOLCE2
3.78198e-82	0.60426	0.537	0.024	1.41423e-77	MSC_MGST1	CELF2
2.6737e-80	0.869061	0.659	0.039	9.99802e-76	MSC_MGST1	SVEP1
1.41894e-79	0.386938	0.317	0.007	5.30598e-75	MSC_MGST1	AGTR1
1.56943e-79	0.25542	0.171	0.001	5.86873e-75	MSC_MGST1	PLP1
1.50679e-77	1.73247	0.78	0.064	5.63451e-73	MSC_MGST1	MFAP5
3.64445e-76	0.632233	0.61	0.034	1.36281e-71	MSC_MGST1	ABLIM1
2.29221e-75	0.551179	0.415	0.015	8.57147e-71	MSC_MGST1	FGF18
3.27544e-74	0.688762	0.537	0.027	1.22482e-69	MSC_MGST1	OSR2
1.2768e-70	0.362131	0.268	0.006	4.77447e-66	MSC_MGST1	FNDC5
3.06486e-70	0.754419	0.61	0.038	1.14607e-65	MSC_MGST1	CREB5
5.62627e-69	0.502228	0.366	0.012	2.10389e-64	MSC_MGST1	CP
3.12151e-68	0.361266	0.268	0.006	1.16726e-63	MSC_MGST1	HSD11B1
4.41224e-68	0.521776	0.439	0.019	1.64991e-63	MSC_MGST1	MAN1C1
1.58055e-66	0.48443	0.341	0.011	5.91031e-62	MSC_MGST1	AOX1
1.79424e-64	0.340281	0.146	0.001	6.70937e-60	MSC_MGST1	CHI3L1
5.40346e-63	0.961667	0.707	0.06	2.02057e-58	MSC_MGST1	PLPP3
5.41682e-63	0.562697	0.463	0.024	2.02557e-58	MSC_MGST1	ADAMTSL4
2.8583e-62	0.253684	0.171	0.002	1.06883e-57	MSC_MGST1	FLNC
1.36987e-61	1.05633	0.805	0.083	5.12249e-57	MSC_MGST1	SCARA5
3.09195e-61	0.431656	0.341	0.012	1.1562e-56	MSC_MGST1	RGMA
5.47638e-60	1.04186	0.854	0.093	2.04784e-55	MSC_MGST1	MGST1
1.3441e-59	0.49412	0.415	0.02	5.02612e-55	MSC_MGST1	MBP
3.38555e-58	0.305771	0.244	0.006	1.26599e-53	MSC_MGST1	PDE1A
6.88662e-58	0.473293	0.39	0.018	2.57518e-53	MSC_MGST1	ANGPTL1
8.0484e-58	0.577734	0.488	0.029	3.00962e-53	MSC_MGST1	SSC5D
5.34113e-57	0.363428	0.22	0.005	1.99726e-52	MSC_MGST1	ITIH5
2.24477e-52	0.302319	0.22	0.005	8.3941e-48	MSC_MGST1	PTGS1
3.36793e-52	0.427796	0.341	0.015	1.2594e-47	MSC_MGST1	GALNT16
5.62467e-50	0.6793	0.585	0.05	2.10329e-45	MSC_MGST1	EMILIN2
7.04342e-50	0.383488	0.268	0.009	2.63382e-45	MSC_MGST1	ADGRD1
2.63361e-48	1.04008	0.756	0.096	9.84812e-44	MSC_MGST1	FBLN5
1.77254e-47	0.380907	0.268	0.01	6.62823e-43	MSC_MGST1	SIRPA
1.06386e-46	0.298015	0.244	0.008	3.97822e-42	MSC_MGST1	C16orf89
2.3983e-46	0.666531	0.61	0.058	8.9682e-42	MSC_MGST1	GFPT2
3.04748e-46	0.374473	0.317	0.015	1.13957e-41	MSC_MGST1	ANOS1
1.32945e-45	1.9106	0.902	0.17	4.97134e-41	MSC_MGST1	CFD
1.50538e-45	0.27677	0.22	0.007	5.62921e-41	MSC_MGST1	ABCA10
3.4895e-45	0.461394	0.415	0.027	1.30486e-40	MSC_MGST1	HSPB6
2.88785e-44	0.35351	0.244	0.009	1.07988e-39	MSC_MGST1	GPC3
1.5665e-43	0.766061	0.634	0.069	5.85777e-39	MSC_MGST1	SPON2
7.90964e-41	0.461818	0.39	0.027	2.95773e-36	MSC_MGST1	CDC42EP2
2.42583e-37	0.326889	0.244	0.011	9.07115e-33	MSC_MGST1	LMO3
1.39484e-36	0.721016	0.61	0.075	5.21586e-32	MSC_MGST1	ALDH1A3
4.79352e-36	0.80037	0.683	0.098	1.79249e-31	MSC_MGST1	TSHZ2
1.36326e-34	0.310098	0.122	0.002	5.09779e-30	MSC_MGST1	C7
5.58984e-34	0.881755	0.78	0.14	2.09026e-29	MSC_MGST1	NFIB
8.14702e-34	0.617957	0.537	0.062	3.0465e-29	MSC_MGST1	ANK2
1.52875e-33	0.419257	0.317	0.021	5.71659e-29	MSC_MGST1	MRGPRF
3.36797e-33	0.444565	0.415	0.037	1.25942e-28	MSC_MGST1	AC245595.1
6.15282e-33	1.04749	0.756	0.151	2.30078e-28	MSC_MGST1	PROCR
7.42765e-33	0.614634	0.585	0.075	2.77749e-28	MSC_MGST1	C1orf21
1.40748e-32	0.369346	0.293	0.019	5.26315e-28	MSC_MGST1	TRIL
2.29568e-32	0.667284	0.732	0.118	8.58446e-28	MSC_MGST1	DCLK1
2.93939e-32	0.423663	0.39	0.034	1.09916e-27	MSC_MGST1	OGFRL1
6.86105e-31	0.76909	0.561	0.076	2.56562e-26	MSC_MGST1	SEMA3C
1.27094e-30	0.531191	0.439	0.046	4.75256e-26	MSC_MGST1	OAF
1.34388e-29	0.680732	0.61	0.092	5.02531e-25	MSC_MGST1	EGFR
5.76444e-29	0.881352	0.756	0.154	2.15555e-24	MSC_MGST1	TMEM176A
6.3123e-29	1.12699	0.78	0.178	2.36042e-24	MSC_MGST1	CLU
3.91993e-27	0.44224	0.293	0.023	1.46582e-22	MSC_MGST1	ANGPT1
4.88422e-27	0.289018	0.244	0.016	1.8264e-22	MSC_MGST1	SCRN1
1.52804e-26	0.711555	0.585	0.096	5.71396e-22	MSC_MGST1	HTRA3
2.34288e-26	1.00535	0.805	0.208	8.76097e-22	MSC_MGST1	ACKR3
2.83181e-26	0.457147	0.415	0.047	1.05893e-21	MSC_MGST1	BIN1
4.06903e-26	1.03406	0.805	0.218	1.52157e-21	MSC_MGST1	AKAP12
1.01168e-25	0.35281	0.317	0.028	3.78308e-21	MSC_MGST1	MGLL
2.45165e-25	0.289872	0.244	0.017	9.16768e-21	MSC_MGST1	INMT
5.473e-25	0.462029	0.439	0.055	2.04657e-20	MSC_MGST1	ARHGAP29
6.00011e-25	0.879471	0.756	0.173	2.24368e-20	MSC_MGST1	COL14A1
7.01265e-25	0.264298	0.22	0.014	2.62231e-20	MSC_MGST1	LIMS2
3.18164e-24	0.358724	0.293	0.026	1.18974e-19	MSC_MGST1	DENND2A
4.2976e-24	0.497109	0.463	0.063	1.60704e-19	MSC_MGST1	STEAP4
2.89791e-23	0.69625	0.585	0.108	1.08364e-18	MSC_MGST1	ABI3BP
3.72984e-23	0.49532	0.415	0.053	1.39474e-18	MSC_MGST1	PRICKLE1
3.84957e-23	0.785574	1	0.914	1.43951e-18	MSC_MGST1	GSN
6.40243e-23	0.560662	0.634	0.12	2.39413e-18	MSC_MGST1	TRIP10
9.06875e-23	0.478908	0.39	0.049	3.39117e-18	MSC_MGST1	ACVRL1
1.48641e-22	0.490796	0.415	0.055	5.55829e-18	MSC_MGST1	MTUS1
2.82438e-22	0.263014	0.22	0.016	1.05615e-17	MSC_MGST1	FGF2
4.80854e-22	0.862123	0.78	0.224	1.7981e-17	MSC_MGST1	TMEM176B
1.4558e-21	0.34566	0.317	0.033	5.44382e-17	MSC_MGST1	BMP5
2.48824e-21	0.372552	0.317	0.034	9.30453e-17	MSC_MGST1	STEAP2
3.5287e-21	0.542162	0.512	0.086	1.31952e-16	MSC_MGST1	GFRA1
4.26066e-21	0.283902	0.244	0.02	1.59323e-16	MSC_MGST1	ZNF385D
4.66146e-21	0.657503	0.561	0.109	1.74311e-16	MSC_MGST1	PODN
5.76978e-21	0.635796	0.61	0.124	2.15755e-16	MSC_MGST1	NEGR1
6.62306e-21	0.549655	0.537	0.096	2.47663e-16	MSC_MGST1	ALDH3A2
1.2397e-20	0.454274	0.439	0.066	4.63574e-16	MSC_MGST1	STEAP1
1.51928e-20	0.288591	0.22	0.017	5.68121e-16	MSC_MGST1	PAMR1
3.70813e-20	0.619857	0.561	0.109	1.38662e-15	MSC_MGST1	TPPP3
3.39938e-19	0.323315	0.293	0.032	1.27116e-14	MSC_MGST1	GSC
3.67205e-19	0.628391	0.659	0.156	1.37313e-14	MSC_MGST1	VIT
5.3044e-19	0.311579	0.293	0.032	1.98353e-14	MSC_MGST1	RERG
1.72569e-18	0.531191	0.585	0.123	6.45306e-14	MSC_MGST1	CAMK2N1
3.43219e-18	0.365018	0.317	0.04	1.28343e-13	MSC_MGST1	TCEAL7
4.50168e-18	0.521078	0.537	0.107	1.68336e-13	MSC_MGST1	ADAMTS1
6.0262e-18	0.825361	0.732	0.228	2.25344e-13	MSC_MGST1	GPX3
7.19295e-18	0.373174	0.366	0.053	2.68973e-13	MSC_MGST1	KREMEN1
8.84071e-18	0.281351	0.22	0.02	3.30589e-13	MSC_MGST1	CERS4
1.3513e-17	0.417058	0.439	0.075	5.05305e-13	MSC_MGST1	OSBPL1A
1.87003e-17	0.866677	0.805	0.329	6.99278e-13	MSC_MGST1	PDGFRL
4.66379e-17	0.498277	0.537	0.112	1.74398e-12	MSC_MGST1	PHGDH
5.36524e-17	0.254057	0.22	0.021	2.00628e-12	MSC_MGST1	PPL
7.34462e-17	0.873495	0.756	0.297	2.74645e-12	MSC_MGST1	PLTP
8.53089e-17	0.565253	0.756	0.216	3.19004e-12	MSC_MGST1	TRIOBP
1.1292e-16	0.885914	0.829	0.442	4.22253e-12	MSC_MGST1	FBLN2
1.43827e-16	0.254907	0.22	0.021	5.37826e-12	MSC_MGST1	ELMO1
1.69071e-16	0.666121	0.902	0.348	6.32223e-12	MSC_MGST1	FXYD1
2.32498e-16	0.53334	0.61	0.149	8.69401e-12	MSC_MGST1	MYC
2.38452e-16	0.548107	0.683	0.181	8.91669e-12	MSC_MGST1	TNFAIP2
3.56509e-16	0.259595	0.195	0.017	1.33313e-11	MSC_MGST1	ISM1
4.30437e-16	0.706508	0.537	0.131	1.60958e-11	MSC_MGST1	ADAMTS5
4.69741e-16	0.4531	0.439	0.082	1.75655e-11	MSC_MGST1	FAM129A
1.43723e-15	0.280926	0.22	0.023	5.37437e-11	MSC_MGST1	CLDN11
2.04742e-15	0.387678	0.293	0.04	7.65612e-11	MSC_MGST1	RDH10
2.68261e-15	0.56193	0.634	0.17	1.00313e-10	MSC_MGST1	MEDAG
2.82932e-15	0.443728	0.488	0.102	1.05799e-10	MSC_MGST1	NOX4
2.94881e-15	0.729468	0.902	0.531	1.10268e-10	MSC_MGST1	LTBP4
3.06637e-15	0.286031	0.195	0.019	1.14664e-10	MSC_MGST1	C1QTNF4
5.0037e-15	0.367413	0.341	0.054	1.87108e-10	MSC_MGST1	CMYA5
7.86863e-15	0.571833	0.537	0.125	2.94239e-10	MSC_MGST1	ADM
8.988e-15	0.675946	0.61	0.175	3.36097e-10	MSC_MGST1	CD248
9.63366e-15	0.343983	0.268	0.036	3.60241e-10	MSC_MGST1	GALNT15
1.10241e-14	0.49541	0.463	0.098	4.12235e-10	MSC_MGST1	DHRS3
1.82597e-14	0.437485	0.488	0.107	6.82803e-10	MSC_MGST1	APBB1IP
1.86497e-14	0.30866	0.293	0.042	6.97385e-10	MSC_MGST1	NHSL1
2.00264e-14	0.509818	0.537	0.129	7.48867e-10	MSC_MGST1	FILIP1L
6.27108e-14	0.567516	0.78	0.271	2.34501e-09	MSC_MGST1	UAP1
7.04581e-14	0.610925	0.902	0.404	2.63471e-09	MSC_MGST1	EPHX1
9.88139e-14	0.621359	0.756	0.275	3.69505e-09	MSC_MGST1	CD44
1.86636e-13	0.64921	0.927	0.823	6.97906e-09	MSC_MGST1	CCDC80
3.00892e-13	0.48239	1	0.858	1.12515e-08	MSC_MGST1	C1S
3.59655e-13	0.33568	0.341	0.061	1.34489e-08	MSC_MGST1	44623
4.07917e-13	0.498189	0.683	0.214	1.52536e-08	MSC_MGST1	JDP2
4.12014e-13	0.420837	0.488	0.115	1.54069e-08	MSC_MGST1	PDPN
4.78384e-13	0.588615	0.756	0.283	1.78887e-08	MSC_MGST1	STOM
4.89338e-13	0.364484	0.39	0.078	1.82983e-08	MSC_MGST1	PDE5A
5.46971e-13	0.386718	0.415	0.087	2.04534e-08	MSC_MGST1	C17orf58
5.69252e-13	0.36004	0.341	0.062	2.12866e-08	MSC_MGST1	SPRY2
8.45178e-13	0.595764	0.756	0.286	3.16046e-08	MSC_MGST1	BASP1
1.58511e-12	0.297042	0.293	0.048	5.92736e-08	MSC_MGST1	IL17D
2.1665e-12	0.413834	0.366	0.074	8.1014e-08	MSC_MGST1	VGLL3
2.54466e-12	0.283264	0.268	0.042	9.51549e-08	MSC_MGST1	LGR4
2.54612e-12	0.485179	0.902	0.715	9.52098e-08	MSC_MGST1	APP
2.6222e-12	0.34905	0.341	0.064	9.80545e-08	MSC_MGST1	PDK4
2.7614e-12	0.574011	0.439	0.108	1.0326e-07	MSC_MGST1	C1QTNF3
6.33302e-12	0.475168	0.634	0.201	2.36817e-07	MSC_MGST1	ANTXR2
7.07568e-12	0.276604	0.268	0.043	2.64588e-07	MSC_MGST1	CD70
8.96597e-12	0.548579	0.756	0.3	3.35273e-07	MSC_MGST1	SGCE
8.98331e-12	0.514183	0.951	0.787	3.35922e-07	MSC_MGST1	PLAC9
9.44837e-12	0.637788	0.732	0.314	3.53312e-07	MSC_MGST1	GAS1
1.11887e-11	0.337317	0.317	0.059	4.1839e-07	MSC_MGST1	ABCA6
1.36464e-11	0.769137	0.902	0.648	5.10292e-07	MSC_MGST1	IGFBP6
1.51896e-11	0.705221	0.756	0.317	5.67998e-07	MSC_MGST1	WISP2
1.52296e-11	0.302839	0.268	0.044	5.69494e-07	MSC_MGST1	RETREG1
2.14972e-11	0.285351	0.244	0.038	8.03868e-07	MSC_MGST1	PID1
2.32677e-11	0.291268	0.293	0.052	8.70072e-07	MSC_MGST1	NDFIP2
2.36021e-11	0.395833	0.39	0.089	8.82579e-07	MSC_MGST1	PTGER4
2.47174e-11	0.421174	0.537	0.152	9.24282e-07	MSC_MGST1	CCND2
2.97393e-11	0.401619	0.463	0.12	1.11207e-06	MSC_MGST1	LY96
3.94455e-11	0.441835	0.488	0.134	1.47502e-06	MSC_MGST1	CITED2
4.38193e-11	0.413247	0.439	0.111	1.63858e-06	MSC_MGST1	BMP4
4.89711e-11	0.87746	0.585	0.234	1.83123e-06	MSC_MGST1	APOD
6.59599e-11	0.623662	0.707	0.316	2.46651e-06	MSC_MGST1	ANGPTL2
6.61753e-11	0.280606	0.293	0.053	2.47456e-06	MSC_MGST1	ABCC9
8.31701e-11	0.590062	0.805	0.382	3.11006e-06	MSC_MGST1	ISLR
9.65988e-11	0.630533	0.854	0.454	3.61221e-06	MSC_MGST1	LHFPL6
9.83849e-11	0.414922	0.39	0.094	3.679e-06	MSC_MGST1	PTGFR
9.99076e-11	0.416469	0.512	0.149	3.73595e-06	MSC_MGST1	MAN1A1
1.02161e-10	0.739552	0.488	0.156	3.8202e-06	MSC_MGST1	IGF1
1.15494e-10	0.256502	0.244	0.04	4.31879e-06	MSC_MGST1	KLF11
1.34398e-10	0.431656	0.512	0.151	5.02567e-06	MSC_MGST1	RUNX1T1
1.53369e-10	0.410966	0.39	0.095	5.73508e-06	MSC_MGST1	KHDRBS3
1.5341e-10	0.324924	0.366	0.082	5.73661e-06	MSC_MGST1	ST3GAL5
1.77335e-10	0.390924	0.951	0.867	6.63127e-06	MSC_MGST1	C1R
2.23874e-10	0.500319	0.61	0.218	8.37153e-06	MSC_MGST1	PLPP1
2.31576e-10	0.608949	0.951	0.707	8.65953e-06	MSC_MGST1	FBLN1
2.83385e-10	0.518367	0.415	0.114	1.05969e-05	MSC_MGST1	PCSK5
2.90447e-10	0.512607	0.634	0.238	1.0861e-05	MSC_MGST1	RAB32
3.11022e-10	0.375307	0.415	0.106	1.16304e-05	MSC_MGST1	RECK
4.06153e-10	0.416847	0.488	0.143	1.51877e-05	MSC_MGST1	NRP1
6.16249e-10	0.422843	0.634	0.222	2.3044e-05	MSC_MGST1	FOXN3
9.61593e-10	0.346731	0.415	0.109	3.59578e-05	MSC_MGST1	CYP27A1
1.34882e-09	0.254415	0.22	0.036	5.04379e-05	MSC_MGST1	HAS1
1.41173e-09	0.475532	0.683	0.273	5.27904e-05	MSC_MGST1	HEXIM1
1.41275e-09	0.689669	0.78	0.444	5.28282e-05	MSC_MGST1	DPT
1.51496e-09	0.345559	0.39	0.1	5.66504e-05	MSC_MGST1	AR
1.86208e-09	0.536608	0.707	0.326	6.96305e-05	MSC_MGST1	NFIA
1.9543e-09	0.491843	0.902	0.521	7.30793e-05	MSC_MGST1	SSPN
2.64795e-09	0.302922	0.341	0.081	9.90173e-05	MSC_MGST1	FOXO1
3.8254e-09	0.35457	0.39	0.105	0.000143047	MSC_MGST1	LXN
4.06466e-09	0.449903	1	0.773	0.000151994	MSC_MGST1	TXNIP
4.14859e-09	0.456252	0.61	0.232	0.000155132	MSC_MGST1	NID1
4.2514e-09	0.508069	0.78	0.395	0.000158977	MSC_MGST1	EBF1
4.41266e-09	0.485324	0.878	0.495	0.000165007	MSC_MGST1	TGFBR2
4.6074e-09	0.445324	0.756	0.329	0.000172289	MSC_MGST1	SH3BP5
7.13444e-09	0.50218	0.732	0.335	0.000266785	MSC_MGST1	INTS6
7.17488e-09	0.32673	0.39	0.106	0.000268298	MSC_MGST1	ADCY3
7.83475e-09	0.403158	0.561	0.197	0.000292973	MSC_MGST1	DDIT3
8.20487e-09	0.390544	0.537	0.184	0.000306813	MSC_MGST1	SVBP
9.37245e-09	0.415886	0.951	0.827	0.000350473	MSC_MGST1	FSTL1
1.02134e-08	0.438367	0.805	0.366	0.00038192	MSC_MGST1	SOD3
1.09043e-08	0.29011	0.317	0.075	0.000407754	MSC_MGST1	CDO1
1.15626e-08	0.376229	0.415	0.122	0.000432371	MSC_MGST1	HSD3B7
1.51933e-08	0.408526	0.561	0.205	0.00056814	MSC_MGST1	GAS7
1.56821e-08	0.390449	0.561	0.202	0.000586416	MSC_MGST1	NCOA1
1.87348e-08	0.404606	0.317	0.08	0.000700568	MSC_MGST1	RARRES1
2.08278e-08	0.579847	0.683	0.319	0.000778834	MSC_MGST1	OGN
2.25572e-08	0.385514	0.902	0.45	0.000843504	MSC_MGST1	RTN3
2.33507e-08	0.389901	0.488	0.164	0.000873176	MSC_MGST1	METTL7A
2.40316e-08	0.329248	0.415	0.122	0.000898636	MSC_MGST1	VSIR
2.40323e-08	0.303158	0.317	0.077	0.000898665	MSC_MGST1	GPRC5A
2.8819e-08	0.251083	0.22	0.042	0.00107766	MSC_MGST1	EBF3
2.93084e-08	0.531191	0.902	0.615	0.00109596	MSC_MGST1	MMP2
3.18457e-08	0.495148	0.854	0.489	0.00119084	MSC_MGST1	DNAJB1
3.98288e-08	0.356549	0.537	0.19	0.00148936	MSC_MGST1	SNTB2
4.15983e-08	0.442148	0.561	0.218	0.00155553	MSC_MGST1	PLXDC1
4.47267e-08	0.447212	0.976	0.686	0.00167251	MSC_MGST1	SELENOP
4.8341e-08	0.375849	0.976	0.856	0.00180766	MSC_MGST1	JUND
5.28885e-08	0.395403	0.805	0.423	0.00197771	MSC_MGST1	IGFBP5
5.83869e-08	0.363114	0.488	0.168	0.00218332	MSC_MGST1	CCDC50
5.91575e-08	0.32022	0.293	0.072	0.00221213	MSC_MGST1	ARL4D
5.9978e-08	0.413822	0.537	0.199	0.00224282	MSC_MGST1	ELN
6.50663e-08	0.342246	0.488	0.165	0.00243309	MSC_MGST1	ARAP1
6.62746e-08	0.267496	0.244	0.052	0.00247827	MSC_MGST1	KITLG
7.75369e-08	0.371165	0.561	0.212	0.00289941	MSC_MGST1	SH3D19
7.89023e-08	0.465138	0.805	0.457	0.00295047	MSC_MGST1	LAMC1
8.8708e-08	0.421114	0.732	0.35	0.00331715	MSC_MGST1	NDN
1.01083e-07	0.453151	0.585	0.241	0.00377989	MSC_MGST1	AKR1C1
1.14191e-07	0.265567	0.293	0.072	0.00427006	MSC_MGST1	CHRD
1.17382e-07	0.450439	0.488	0.184	0.00438939	MSC_MGST1	BOC
1.19587e-07	0.40996	0.878	0.559	0.00447183	MSC_MGST1	SDCBP
1.21616e-07	0.33736	0.341	0.096	0.00454771	MSC_MGST1	MEOX2
1.21844e-07	0.406781	0.61	0.255	0.00455623	MSC_MGST1	PCYOX1
1.32816e-07	0.276118	0.268	0.063	0.00496652	MSC_MGST1	NFIL3
1.46055e-07	0.355069	0.366	0.108	0.00546158	MSC_MGST1	G0S2
1.57565e-07	0.329557	0.463	0.157	0.00589199	MSC_MGST1	ZNF704
1.63575e-07	0.356186	0.512	0.187	0.00611674	MSC_MGST1	CBR3
1.83836e-07	0.353998	0.61	0.247	0.00687438	MSC_MGST1	VAT1
1.87765e-07	0.372377	0.39	0.124	0.00702127	MSC_MGST1	CCDC71L
1.89859e-07	0.475428	0.78	0.409	0.00709957	MSC_MGST1	SOD2
2.07519e-07	0.262739	0.293	0.074	0.00775997	MSC_MGST1	CHAMP1
2.30478e-07	0.323468	0.39	0.121	0.00861849	MSC_MGST1	OTUD1
2.30531e-07	0.459204	0.805	0.512	0.00862046	MSC_MGST1	ADD3
2.32945e-07	0.414109	0.78	0.416	0.00871074	MSC_MGST1	PAM
2.34504e-07	0.286079	0.293	0.075	0.00876904	MSC_MGST1	ROBO1
2.38491e-07	0.400117	0.902	0.599	0.00891813	MSC_MGST1	CYBRD1
2.59058e-07	0.35293	0.512	0.19	0.00968721	MSC_MGST1	PHLDB2
2.6451e-07	0.35805	0.537	0.207	0.00989107	MSC_MGST1	PBXIP1
2.88781e-07	0.341931	0.439	0.15	0.0107987	MSC_MGST1	RAB3IL1
3.01964e-07	0.355707	0.976	0.778	0.0112917	MSC_MGST1	HLA-E
3.10152e-07	0.453576	0.756	0.453	0.0115978	MSC_MGST1	DAB2
3.12944e-07	0.337807	0.463	0.162	0.0117022	MSC_MGST1	CLEC2B
3.26814e-07	0.261529	0.293	0.076	0.0122209	MSC_MGST1	HRH1
3.32593e-07	0.257502	0.293	0.076	0.012437	MSC_MGST1	AHNAK2
3.64879e-07	0.457413	0.732	0.386	0.0136443	MSC_MGST1	PTGIS
3.82416e-07	0.445895	0.902	0.661	0.0143001	MSC_MGST1	EGR1
3.835e-07	0.270863	0.317	0.087	0.0143406	MSC_MGST1	TLNRD1
3.91195e-07	0.418661	0.561	0.233	0.0146283	MSC_MGST1	PLAU
4.04929e-07	0.358089	0.732	0.341	0.0151419	MSC_MGST1	PPP1R10
4.22458e-07	0.359016	0.439	0.154	0.0157974	MSC_MGST1	HIC1
4.59964e-07	0.306643	0.415	0.137	0.0171999	MSC_MGST1	TMEM159
4.95016e-07	0.385126	0.366	0.117	0.0185106	MSC_MGST1	RNASE4
5.73736e-07	0.284469	0.293	0.079	0.0214543	MSC_MGST1	TASP1
5.78102e-07	0.434433	0.707	0.382	0.0216175	MSC_MGST1	GYPC
6.73528e-07	0.42505	0.512	0.206	0.0251859	MSC_MGST1	RASD1
6.96262e-07	0.349337	0.561	0.229	0.026036	MSC_MGST1	SELENBP1
7.01495e-07	0.278342	0.341	0.102	0.0262317	MSC_MGST1	DRAM1
7.51819e-07	0.384735	0.927	0.772	0.0281135	MSC_MGST1	ZFP36L2
9.00756e-07	0.41011	0.585	0.247	0.0336829	MSC_MGST1	ATF3
9.58662e-07	0.456387	0.854	0.574	0.0358482	MSC_MGST1	SMOC2
9.68437e-07	0.379657	0.927	0.683	0.0362137	MSC_MGST1	IL6ST
1.06814e-06	0.298682	0.415	0.142	0.0399419	MSC_MGST1	SRGAP1
1.07009e-06	0.442453	0.659	0.351	0.0400148	MSC_MGST1	GLIPR2
1.19183e-06	0.453548	0.732	0.445	0.0445671	MSC_MGST1	FHL1
1.30099e-06	0.397562	0.829	0.596	0.0486492	MSC_MGST1	LIMA1
1.32728e-06	0.315451	0.488	0.186	0.0496322	MSC_MGST1	DCAF7
1.36597e-06	0.291853	0.39	0.13	0.051079	MSC_MGST1	ASAP2
1.44716e-06	0.361869	0.78	0.404	0.0541152	MSC_MGST1	PSIP1
1.55329e-06	0.33962	0.512	0.206	0.0580837	MSC_MGST1	PROS1
1.95576e-06	0.274808	0.317	0.094	0.0731337	MSC_MGST1	GEM
2.14849e-06	0.369038	0.512	0.215	0.0803406	MSC_MGST1	SESTD1
2.25438e-06	0.337044	0.415	0.151	0.0843001	MSC_MGST1	ABL1
2.32034e-06	0.358806	0.902	0.588	0.0867666	MSC_MGST1	TUBB4B
2.32389e-06	0.282541	0.976	0.872	0.0868996	MSC_MGST1	RTN4
2.41742e-06	0.311594	0.39	0.136	0.090397	MSC_MGST1	SOS1
2.80239e-06	0.308919	0.488	0.192	0.104793	MSC_MGST1	PTGFRN
3.38181e-06	0.401562	0.537	0.246	0.126459	MSC_MGST1	DBN1
3.53077e-06	0.353087	0.585	0.268	0.13203	MSC_MGST1	CREG1
3.71176e-06	0.304563	0.415	0.15	0.138798	MSC_MGST1	PCDH9
3.89476e-06	0.391014	0.829	0.593	0.145641	MSC_MGST1	RHOB
3.91003e-06	0.367125	0.854	0.649	0.146212	MSC_MGST1	MYADM
3.9387e-06	0.347948	0.854	0.626	0.147284	MSC_MGST1	MTCH1
4.06016e-06	0.333703	0.707	0.364	0.151826	MSC_MGST1	NFKBIA
4.06905e-06	0.261126	0.268	0.075	0.152158	MSC_MGST1	CEP152
4.92866e-06	0.369319	0.732	0.393	0.184302	MSC_MGST1	IFRD1
5.52108e-06	0.332071	0.585	0.268	0.206455	MSC_MGST1	MCUB
5.70162e-06	0.275536	0.366	0.126	0.213206	MSC_MGST1	SOBP
5.90302e-06	0.364594	0.415	0.161	0.220737	MSC_MGST1	PIM1
6.20386e-06	0.307178	0.415	0.156	0.231987	MSC_MGST1	GYG1
6.82383e-06	0.340025	0.415	0.16	0.25517	MSC_MGST1	PLIN2
8.23235e-06	0.266802	0.39	0.141	0.307841	MSC_MGST1	DUSP14
8.74281e-06	0.34491	0.659	0.333	0.326928	MSC_MGST1	ZC3HAV1
8.91524e-06	0.375472	0.756	0.476	0.333376	MSC_MGST1	UGP2
9.91221e-06	0.322792	0.756	0.405	0.370657	MSC_MGST1	NFIX
1.03783e-05	0.327496	0.488	0.208	0.388087	MSC_MGST1	APOL6
1.12909e-05	0.328778	0.634	0.316	0.422213	MSC_MGST1	RBBP7
1.15097e-05	0.285656	0.439	0.174	0.430395	MSC_MGST1	AC100810.1
1.18095e-05	0.308411	0.341	0.118	0.441604	MSC_MGST1	SERTAD3
1.2547e-05	0.331491	0.927	0.736	0.469181	MSC_MGST1	IFI16
1.26591e-05	0.393861	0.927	0.767	0.473373	MSC_MGST1	GADD45B
1.33897e-05	0.310986	0.537	0.239	0.500693	MSC_MGST1	SAMHD1
1.36163e-05	0.367747	0.805	0.475	0.509166	MSC_MGST1	KLF4
1.50602e-05	0.296583	0.732	0.375	0.563162	MSC_MGST1	CARHSP1
1.51165e-05	0.309365	0.561	0.256	0.565266	MSC_MGST1	CDKN1C
1.68807e-05	0.258044	0.341	0.119	0.631236	MSC_MGST1	CUTC
1.69309e-05	0.317999	0.439	0.18	0.633114	MSC_MGST1	ABHD5
1.7474e-05	0.262112	0.366	0.133	0.653424	MSC_MGST1	YARS
1.76174e-05	0.325273	0.683	0.363	0.658784	MSC_MGST1	CBR1
1.77477e-05	0.363382	0.39	0.148	0.663656	MSC_MGST1	CCL2
1.80878e-05	0.306075	0.854	0.53	0.676373	MSC_MGST1	HIGD2A
1.83339e-05	0.272457	0.415	0.162	0.685578	MSC_MGST1	PLPBP
1.8781e-05	0.315852	0.634	0.319	0.702299	MSC_MGST1	STX8
1.99665e-05	0.250698	0.341	0.12	0.746627	MSC_MGST1	FAM45A
2.17505e-05	0.396262	0.854	0.58	0.813337	MSC_MGST1	SOCS3
2.36836e-05	0.251499	0.171	0.04	0.885623	MSC_MGST1	SFRP1
2.40543e-05	0.438182	0.756	0.507	0.899488	MSC_MGST1	CYR61
2.65031e-05	0.335413	0.976	0.728	0.991057	MSC_MGST1	DUSP1
2.69341e-05	0.319446	0.61	0.306	1	MSC_MGST1	DLC1
2.71738e-05	0.251469	0.341	0.122	1	MSC_MGST1	DUSP22
2.83396e-05	0.324033	0.61	0.304	1	MSC_MGST1	ADAM9
2.84129e-05	0.319721	0.634	0.327	1	MSC_MGST1	LARP6
3.27992e-05	0.327476	0.659	0.355	1	MSC_MGST1	CPNE3
3.62285e-05	0.346889	0.78	0.498	1	MSC_MGST1	IER5L
3.72969e-05	0.297709	0.854	0.545	1	MSC_MGST1	GINM1
3.99029e-05	0.305373	0.878	0.639	1	MSC_MGST1	BEX3
4.05596e-05	0.282102	0.317	0.114	1	MSC_MGST1	RCAN1
4.20336e-05	0.261543	0.39	0.154	1	MSC_MGST1	HDAC7
4.45913e-05	0.319927	0.829	0.555	1	MSC_MGST1	RBMS1
4.593e-05	0.278782	0.39	0.156	1	MSC_MGST1	SYNE3
4.74586e-05	0.275711	0.22	0.064	1	MSC_MGST1	BMPER
4.89991e-05	0.287337	0.561	0.272	1	MSC_MGST1	CTSO
4.99505e-05	0.334326	0.488	0.225	1	MSC_MGST1	BTBD7
5.06494e-05	0.309648	0.756	0.441	1	MSC_MGST1	GLUL
5.65517e-05	0.307005	0.976	0.872	1	MSC_MGST1	JUN
5.80072e-05	0.262167	0.951	0.778	1	MSC_MGST1	NFIC
5.98e-05	0.330785	0.829	0.534	1	MSC_MGST1	PLXDC2
6.02758e-05	0.290458	0.561	0.273	1	MSC_MGST1	NEU1
6.08202e-05	0.327962	0.829	0.593	1	MSC_MGST1	DDAH2
6.09436e-05	0.258741	0.927	0.763	1	MSC_MGST1	EIF3E
6.10592e-05	0.310965	0.61	0.313	1	MSC_MGST1	SLC2A4RG
6.13554e-05	0.293174	0.61	0.313	1	MSC_MGST1	GLRX
6.41598e-05	0.30656	0.878	0.686	1	MSC_MGST1	CPQ
6.44812e-05	0.394668	0.732	0.462	1	MSC_MGST1	KLF2
6.72575e-05	0.462797	0.244	0.078	1	MSC_MGST1	SFRP2
6.9506e-05	0.301806	0.488	0.226	1	MSC_MGST1	REV3L
7.34055e-05	0.287174	0.78	0.467	1	MSC_MGST1	RRAGA
7.45204e-05	0.271304	0.317	0.118	1	MSC_MGST1	RGS10
7.49361e-05	0.318345	0.78	0.531	1	MSC_MGST1	SMIM14
7.55913e-05	0.331282	0.488	0.233	1	MSC_MGST1	CES1
8.24423e-05	0.254064	0.39	0.16	1	MSC_MGST1	RBMX2
8.29827e-05	0.252512	0.927	0.8	1	MSC_MGST1	YBX3
8.32297e-05	0.260994	0.415	0.176	1	MSC_MGST1	OLFML1
8.4541e-05	0.25548	0.415	0.175	1	MSC_MGST1	CDKN2C
8.47255e-05	0.265935	0.341	0.133	1	MSC_MGST1	44622
8.4967e-05	0.29863	0.902	0.599	1	MSC_MGST1	PDGFRA
9.31459e-05	0.275825	0.561	0.279	1	MSC_MGST1	GNG12
9.72563e-05	0.328778	0.902	0.677	1	MSC_MGST1	IER3
0.000100221	0.250339	0.39	0.161	1	MSC_MGST1	CCNG1
0.000103724	0.297595	0.878	0.619	1	MSC_MGST1	SPTBN1
0.000107715	0.302373	0.512	0.253	1	MSC_MGST1	CLN5
0.000109617	0.266159	0.39	0.164	1	MSC_MGST1	BEX4
0.000112695	0.29439	0.902	0.68	1	MSC_MGST1	FCGRT
0.00011524	0.275785	0.976	0.885	1	MSC_MGST1	FBN1
0.000120961	0.283412	0.732	0.431	1	MSC_MGST1	MGAT1
0.000125504	0.258884	0.463	0.211	1	MSC_MGST1	HERC4
0.000126236	0.277784	0.854	0.566	1	MSC_MGST1	MAP1LC3B
0.000127414	0.278254	0.61	0.319	1	MSC_MGST1	SAV1
0.00013697	0.27387	0.463	0.215	1	MSC_MGST1	TSC22D2
0.000147613	0.266749	0.561	0.284	1	MSC_MGST1	AGTRAP
0.000155412	0.26417	0.366	0.153	1	MSC_MGST1	CFL2
0.000156418	0.270638	0.707	0.406	1	MSC_MGST1	CTDSP2
0.000161207	0.314568	0.927	0.763	1	MSC_MGST1	IER2
0.000172909	0.263635	0.756	0.449	1	MSC_MGST1	SAT2
0.000185562	0.285939	0.634	0.354	1	MSC_MGST1	GABARAPL1
0.00018605	0.278108	0.854	0.619	1	MSC_MGST1	TNFRSF1A
0.000187982	0.30266	0.537	0.274	1	MSC_MGST1	CAV1
0.000194255	0.296269	0.463	0.226	1	MSC_MGST1	UBTD2
0.000194337	0.290513	0.683	0.396	1	MSC_MGST1	RBMS3
0.000194952	0.255637	0.341	0.139	1	MSC_MGST1	HCG11
0.000196331	0.250637	0.927	0.738	1	MSC_MGST1	SRSF3
0.000200911	0.260419	0.366	0.155	1	MSC_MGST1	GPSM2
0.000204525	0.293875	0.707	0.421	1	MSC_MGST1	ID2
0.000206083	0.314792	0.463	0.227	1	MSC_MGST1	NR2F2
0.000208592	0.307127	0.537	0.284	1	MSC_MGST1	PCDH18
0.000218939	0.331329	0.756	0.49	1	MSC_MGST1	CD55
0.000232329	0.273024	0.78	0.497	1	MSC_MGST1	CTSL
0.000233191	0.274814	0.537	0.278	1	MSC_MGST1	AKR1B1
0.000258585	0.252145	0.463	0.221	1	MSC_MGST1	GLTP
0.000264936	0.293333	0.78	0.531	1	MSC_MGST1	DPYSL2
0.000283829	0.320557	0.463	0.231	1	MSC_MGST1	NTRK2
0.000286506	0.315917	0.78	0.583	1	MSC_MGST1	EEA1
0.000289599	0.265562	0.829	0.58	1	MSC_MGST1	CAPN2
0.000293214	0.256304	0.366	0.159	1	MSC_MGST1	SNX21
0.000303801	0.261549	0.415	0.192	1	MSC_MGST1	OGFR
0.000316993	0.262637	0.415	0.192	1	MSC_MGST1	COX11
0.000328801	0.342206	0.61	0.36	1	MSC_MGST1	SPRY1
0.000340017	0.273467	0.512	0.263	1	MSC_MGST1	AHR
0.000375838	0.328336	0.488	0.264	1	MSC_MGST1	PLAGL1
0.000411132	0.307327	0.488	0.259	1	MSC_MGST1	TUBB2A
0.000483653	0.262195	0.634	0.36	1	MSC_MGST1	PLSCR1
0.000580851	0.267269	0.366	0.168	1	MSC_MGST1	WLS
0.000602765	0.268606	0.585	0.333	1	MSC_MGST1	ZEB1
0.000619734	0.284722	0.561	0.323	1	MSC_MGST1	PLBD1
0.000791855	0.257158	0.659	0.399	1	MSC_MGST1	TRIM8
0.000809947	0.279565	0.756	0.549	1	MSC_MGST1	BRD2
0.000811912	0.253138	0.488	0.258	1	MSC_MGST1	VPS4B
0.000854782	0.266237	0.732	0.485	1	MSC_MGST1	RHOBTB3
0.000974076	0.27954	0.488	0.268	1	MSC_MGST1	VASN
0.00108996	0.27214	0.585	0.354	1	MSC_MGST1	CCDC25
0.00111695	0.255229	0.805	0.592	1	MSC_MGST1	TSPAN4
0.00121139	0.259319	0.463	0.249	1	MSC_MGST1	EPS15
0.00122072	0.271145	0.78	0.589	1	MSC_MGST1	ANXA4
0.00122631	0.252027	0.854	0.66	1	MSC_MGST1	LSP1
0.00127589	0.255841	0.585	0.35	1	MSC_MGST1	IMP3
0.00164556	0.28537	0.488	0.278	1	MSC_MGST1	BTG2
0.00166303	0.262674	0.585	0.362	1	MSC_MGST1	BDH2
0.00184927	0.278342	0.927	0.714	1	MSC_MGST1	HSPA1B
0.00185362	0.253206	0.634	0.405	1	MSC_MGST1	MYCBP2
0.00240863	0.266828	0.805	0.604	1	MSC_MGST1	AXL
0.00244495	0.270558	0.854	0.66	1	MSC_MGST1	ZFP36
0.00244572	0.295076	0.561	0.372	1	MSC_MGST1	RBBP6
0.00275762	0.268157	0.512	0.305	1	MSC_MGST1	POLR2C
0.00309949	0.260205	0.463	0.272	1	MSC_MGST1	IL13RA1
0.00397381	0.282327	0.634	0.45	1	MSC_MGST1	KCNQ1OT1
